# Supplementary material
Source: PubMed Central journal article supplement (PMC6531323)

Supplementary Table 1: disease definitions from UK-Biobank

| Phenotype               | Data field | Field name                                      | Data code | Data code definition               | Inclusion |
|-------------------------|------------|-------------------------------------------------|-----------|------------------------------------|-----------|
| Coronary Artery Disease | 20002      | Non-cancer illness code, self-reported          | 1074      | angina                             | 1         |
| Coronary Artery Disease | 20002      | Non-cancer illness code, self-reported          | 1075      | heart attack/myocardial infarction | 1         |
| Coronary Artery Disease | 20004      | Operation code, self-reported                   | 1070      | coronary angioplasty               | 1         |
| Coronary Artery Disease | 20004      | Operation code, self-reported                   | 1095      | coronary artery bypass graft       | 1         |
| Coronary Artery Disease | 20004      | Operation code, self-reported                   | 1523      | triple heart bypass                | 1         |
| Coronary Artery Disease | 6150       | Vascular/heart problems diagnosed by doctor     | 1         | Heart attack                       | 1         |
| Coronary Artery Disease | 6150       | Vascular/heart problems diagnosed by doctor     | 2         | Angina                             | 1         |
| Coronary Artery Disease | 41202      | Diagnoses - main ICD10                          | I20       | Angina pectoris                    | 1         |
| Coronary Artery Disease | 41204      | Diagnoses - secondary ICD10                     | I20       | Angina pectoris                    | 1         |
| Coronary Artery Disease | 40001      | Underlying (primary) cause of death: ICD10      | I20       | Angina pectoris                    | 1         |
| Coronary Artery Disease | 40002      | Contributory (secondary) causes of death: ICD10 | I20       | Angina pectoris                    | 1         |
| Coronary Artery Disease | 41202      | Diagnoses - main ICD10                          | I20.0     | Unstable angina                    | 1         |
| Coronary Artery Disease | 41204      | Diagnoses - secondary ICD10                     | I20.0     | Unstable angina                    | 1         |
| Coronary Artery Disease | 40001      | Underlying (primary) cause of death: ICD10      | I20.0     | Unstable angina                    | 1         |
| Coronary Artery Disease | 40002      | Contributory (secondary) causes of death: ICD10 | I20.0     | Unstable angina                    | 1         |
| Coronary Artery Disease | 41202      | Diagnoses - main ICD10                          | I20.1     | Angina pectoris                    | 1         |
| Coronary Artery Disease | 41204      | Diagnoses - secondary ICD10                     | I20.1     | Angina pectoris                    | 1         |
| Coronary Artery Disease | 40001      | Underlying (primary) cause of death: ICD10      | I20.1     | Angina pectoris                    | 1         |

|                         |       |                                                 |       |                  |   |
|-------------------------|-------|-------------------------------------------------|-------|------------------|---|
| Coronary Artery Disease | 40002 | Contributory (secondary) causes of death: ICD10 | I20.1 | Angina pectoris  | 1 |
| Coronary Artery Disease | 41202 | Diagnoses - main ICD10                          | I20.8 | Other forms of a | 1 |
| Coronary Artery Disease | 41204 | Diagnoses - secondary ICD10                     | I20.8 | Other forms of a | 1 |
| Coronary Artery Disease | 40001 | Underlying (primary) cause of death: ICD10      | I20.8 | Other forms of a | 1 |
| Coronary Artery Disease | 40002 | Contributory (secondary) causes of death: ICD10 | I20.8 | Other forms of a | 1 |
| Coronary Artery Disease | 41202 | Diagnoses - main ICD10                          | I20.9 | Angina pectoris, | 1 |
| Coronary Artery Disease | 41204 | Diagnoses - secondary ICD10                     | I20.9 | Angina pectoris, | 1 |
| Coronary Artery Disease | 40001 | Underlying (primary) cause of death: ICD10      | I20.9 | Angina pectoris, | 1 |
| Coronary Artery Disease | 40002 | Contributory (secondary) causes of death: ICD10 | I20.9 | Angina pectoris, | 1 |
| Coronary Artery Disease | 41202 | Diagnoses - main ICD10                          | I21   | Acute myocardia  | 1 |
| Coronary Artery Disease | 41204 | Diagnoses - secondary ICD10                     | I21   | Acute myocardia  | 1 |
| Coronary Artery Disease | 40001 | Underlying (primary) cause of death: ICD10      | I21   | Acute myocardia  | 1 |
| Coronary Artery Disease | 40002 | Contributory (secondary) causes of death: ICD10 | I21   | Acute myocardia  | 1 |
| Coronary Artery Disease | 41202 | Diagnoses - main ICD10                          | I21.0 | Acute transmura  | 1 |
| Coronary Artery Disease | 41204 | Diagnoses - secondary ICD10                     | I21.0 | Acute transmura  | 1 |
| Coronary Artery Disease | 40001 | Underlying (primary) cause of death: ICD10      | I21.0 | Acute transmura  | 1 |
| Coronary Artery Disease | 40002 | Contributory (secondary) causes of death: ICD10 | I21.0 | Acute transmura  | 1 |
| Coronary Artery Disease | 41202 | Diagnoses - main ICD10                          | I21.1 | Acute transmura  | 1 |
| Coronary Artery Disease | 41204 | Diagnoses - secondary ICD10                     | I21.1 | Acute transmura  | 1 |
| Coronary Artery Disease | 40001 | Underlying (primary) cause of death: ICD10      | I21.1 | Acute transmura  | 1 |

|                         |       |                                                 |       |                 |   |
|-------------------------|-------|-------------------------------------------------|-------|-----------------|---|
| Coronary Artery Disease | 40002 | Contributory (secondary) causes of death: ICD10 | I21.1 | Acute transmura | 1 |
| Coronary Artery Disease | 41202 | Diagnoses - main ICD10                          | I21.2 | Acute transmura | 1 |
| Coronary Artery Disease | 41204 | Diagnoses - secondary ICD10                     | I21.2 | Acute transmura | 1 |
| Coronary Artery Disease | 40001 | Underlying (primary) cause of death: ICD10      | I21.2 | Acute transmura | 1 |
| Coronary Artery Disease | 40002 | Contributory (secondary) causes of death: ICD10 | I21.2 | Acute transmura | 1 |
| Coronary Artery Disease | 41202 | Diagnoses - main ICD10                          | I21.3 | Acute transmura | 1 |
| Coronary Artery Disease | 41204 | Diagnoses - secondary ICD10                     | I21.3 | Acute transmura | 1 |
| Coronary Artery Disease | 40001 | Underlying (primary) cause of death: ICD10      | I21.3 | Acute transmura | 1 |
| Coronary Artery Disease | 40002 | Contributory (secondary) causes of death: ICD10 | I21.3 | Acute transmura | 1 |
| Coronary Artery Disease | 41202 | Diagnoses - main ICD10                          | I21.4 | Acute subendoc  | 1 |
| Coronary Artery Disease | 41204 | Diagnoses - secondary ICD10                     | I21.4 | Acute subendoc  | 1 |
| Coronary Artery Disease | 40001 | Underlying (primary) cause of death: ICD10      | I21.4 | Acute subendoc  | 1 |
| Coronary Artery Disease | 40002 | Contributory (secondary) causes of death: ICD10 | I21.4 | Acute subendoc  | 1 |
| Coronary Artery Disease | 41202 | Diagnoses - main ICD10                          | I21.9 | Acute myocardia | 1 |
| Coronary Artery Disease | 41204 | Diagnoses - secondary ICD10                     | I21.9 | Acute myocardia | 1 |
| Coronary Artery Disease | 40001 | Underlying (primary) cause of death: ICD10      | I21.9 | Acute myocardia | 1 |
| Coronary Artery Disease | 40002 | Contributory (secondary) causes of death: ICD10 | I21.9 | Acute myocardia | 1 |
| Coronary Artery Disease | 41202 | Diagnoses - main ICD10                          | I22   | Subsequent myc  | 1 |
| Coronary Artery Disease | 41204 | Diagnoses - secondary ICD10                     | I22   | Subsequent myc  | 1 |
| Coronary Artery Disease | 40001 | Underlying (primary) cause of death: ICD10      | I22   | Subsequent myc  | 1 |

|                         |       |                                                 |       |                   |   |
|-------------------------|-------|-------------------------------------------------|-------|-------------------|---|
| Coronary Artery Disease | 40002 | Contributory (secondary) causes of death: ICD10 | I22   | Subsequent myc    | 1 |
| Coronary Artery Disease | 41202 | Diagnoses - main ICD10                          | I22.0 | Subsequent myc    | 1 |
| Coronary Artery Disease | 41204 | Diagnoses - secondary ICD10                     | I22.0 | Subsequent myc    | 1 |
| Coronary Artery Disease | 40001 | Underlying (primary) cause of death: ICD10      | I22.0 | Subsequent myc    | 1 |
| Coronary Artery Disease | 40002 | Contributory (secondary) causes of death: ICD10 | I22.0 | Subsequent myc    | 1 |
| Coronary Artery Disease | 41202 | Diagnoses - main ICD10                          | I22.1 | Subsequent myc    | 1 |
| Coronary Artery Disease | 41204 | Diagnoses - secondary ICD10                     | I22.1 | Subsequent myc    | 1 |
| Coronary Artery Disease | 40001 | Underlying (primary) cause of death: ICD10      | I22.1 | Subsequent myc    | 1 |
| Coronary Artery Disease | 40002 | Contributory (secondary) causes of death: ICD10 | I22.1 | Subsequent myc    | 1 |
| Coronary Artery Disease | 41202 | Diagnoses - main ICD10                          | I22.8 | Subsequent myc    | 1 |
| Coronary Artery Disease | 41204 | Diagnoses - secondary ICD10                     | I22.8 | Subsequent myc    | 1 |
| Coronary Artery Disease | 40001 | Underlying (primary) cause of death: ICD10      | I22.8 | Subsequent myc    | 1 |
| Coronary Artery Disease | 40002 | Contributory (secondary) causes of death: ICD10 | I22.8 | Subsequent myc    | 1 |
| Coronary Artery Disease | 41202 | Diagnoses - main ICD10                          | I22.9 | Subsequent myc    | 1 |
| Coronary Artery Disease | 41204 | Diagnoses - secondary ICD10                     | I22.9 | Subsequent myc    | 1 |
| Coronary Artery Disease | 40001 | Underlying (primary) cause of death: ICD10      | I22.9 | Subsequent myc    | 1 |
| Coronary Artery Disease | 40002 | Contributory (secondary) causes of death: ICD10 | I22.9 | Subsequent myc    | 1 |
| Coronary Artery Disease | 41202 | Diagnoses - main ICD10                          | I23   | Certain current c | 1 |
| Coronary Artery Disease | 41204 | Diagnoses - secondary ICD10                     | I23   | Certain current c | 1 |
| Coronary Artery Disease | 40001 | Underlying (primary) cause of death: ICD10      | I23   | Certain current c | 1 |

|                         |       |                                                 |       |                    |   |
|-------------------------|-------|-------------------------------------------------|-------|--------------------|---|
| Coronary Artery Disease | 40002 | Contributory (secondary) causes of death: ICD10 | I23   | Certain current c  | 1 |
| Coronary Artery Disease | 41202 | Diagnoses - main ICD10                          | I23.0 | Haemopericardiu    | 1 |
| Coronary Artery Disease | 41204 | Diagnoses - secondary ICD10                     | I23.0 | Haemopericardiu    | 1 |
| Coronary Artery Disease | 40001 | Underlying (primary) cause of death: ICD10      | I23.0 | Haemopericardiu    | 1 |
| Coronary Artery Disease | 40002 | Contributory (secondary) causes of death: ICD10 | I23.0 | Haemopericardiu    | 1 |
| Coronary Artery Disease | 41202 | Diagnoses - main ICD10                          | I23.1 | Atrial septal defe | 1 |
| Coronary Artery Disease | 41204 | Diagnoses - secondary ICD10                     | I23.1 | Atrial septal defe | 1 |
| Coronary Artery Disease | 40001 | Underlying (primary) cause of death: ICD10      | I23.1 | Atrial septal defe | 1 |
| Coronary Artery Disease | 40002 | Contributory (secondary) causes of death: ICD10 | I23.1 | Atrial septal defe | 1 |
| Coronary Artery Disease | 41202 | Diagnoses - main ICD10                          | I23.2 | Ventricular septa  | 1 |
| Coronary Artery Disease | 41204 | Diagnoses - secondary ICD10                     | I23.2 | Ventricular septa  | 1 |
| Coronary Artery Disease | 40001 | Underlying (primary) cause of death: ICD10      | I23.2 | Ventricular septa  | 1 |
| Coronary Artery Disease | 40002 | Contributory (secondary) causes of death: ICD10 | I23.2 | Ventricular septa  | 1 |
| Coronary Artery Disease | 41202 | Diagnoses - main ICD10                          | I23.3 | Rupture of cardia  | 1 |
| Coronary Artery Disease | 41204 | Diagnoses - secondary ICD10                     | I23.3 | Rupture of cardia  | 1 |
| Coronary Artery Disease | 40001 | Underlying (primary) cause of death: ICD10      | I23.3 | Rupture of cardia  | 1 |
| Coronary Artery Disease | 40002 | Contributory (secondary) causes of death: ICD10 | I23.3 | Rupture of cardia  | 1 |
| Coronary Artery Disease | 41202 | Diagnoses - main ICD10                          | I23.4 | Rupture of chord   | 1 |
| Coronary Artery Disease | 41204 | Diagnoses - secondary ICD10                     | I23.4 | Rupture of chord   | 1 |
| Coronary Artery Disease | 40001 | Underlying (primary) cause of death: ICD10      | I23.4 | Rupture of chord   | 1 |

|                         |       |                                                 |       |                   |   |
|-------------------------|-------|-------------------------------------------------|-------|-------------------|---|
| Coronary Artery Disease | 40002 | Contributory (secondary) causes of death: ICD10 | I23.4 | Rupture of chord  | 1 |
| Coronary Artery Disease | 41202 | Diagnoses - main ICD10                          | I23.5 | Rupture of papill | 1 |
| Coronary Artery Disease | 41204 | Diagnoses - secondary ICD10                     | I23.5 | Rupture of papill | 1 |
| Coronary Artery Disease | 40001 | Underlying (primary) cause of death: ICD10      | I23.5 | Rupture of papill | 1 |
| Coronary Artery Disease | 40002 | Contributory (secondary) causes of death: ICD10 | I23.5 | Rupture of papill | 1 |
| Coronary Artery Disease | 41202 | Diagnoses - main ICD10                          | I23.6 | Thrombosis of at  | 1 |
| Coronary Artery Disease | 41204 | Diagnoses - secondary ICD10                     | I23.6 | Thrombosis of at  | 1 |
| Coronary Artery Disease | 40001 | Underlying (primary) cause of death: ICD10      | I23.6 | Thrombosis of at  | 1 |
| Coronary Artery Disease | 40002 | Contributory (secondary) causes of death: ICD10 | I23.6 | Thrombosis of at  | 1 |
| Coronary Artery Disease | 41202 | Diagnoses - main ICD10                          | I23.8 | Other current col | 1 |
| Coronary Artery Disease | 41204 | Diagnoses - secondary ICD10                     | I23.8 | Other current col | 1 |
| Coronary Artery Disease | 40001 | Underlying (primary) cause of death: ICD10      | I23.8 | Other current col | 1 |
| Coronary Artery Disease | 40002 | Contributory (secondary) causes of death: ICD10 | I23.8 | Other current col | 1 |
| Coronary Artery Disease | 41202 | Diagnoses - main ICD10                          | I24   | Other acute isch  | 1 |
| Coronary Artery Disease | 41204 | Diagnoses - secondary ICD10                     | I24   | Other acute isch  | 1 |
| Coronary Artery Disease | 40001 | Underlying (primary) cause of death: ICD10      | I24   | Other acute isch  | 1 |
| Coronary Artery Disease | 40002 | Contributory (secondary) causes of death: ICD10 | I24   | Other acute isch  | 1 |
| Coronary Artery Disease | 41202 | Diagnoses - main ICD10                          | I24.0 | Coronary thromb   | 1 |
| Coronary Artery Disease | 41204 | Diagnoses - secondary ICD10                     | I24.0 | Coronary thromb   | 1 |
| Coronary Artery Disease | 40001 | Underlying (primary) cause of death: ICD10      | I24.0 | Coronary thromb   | 1 |

|                         |       |                                                 |       |                   |   |
|-------------------------|-------|-------------------------------------------------|-------|-------------------|---|
| Coronary Artery Disease | 40002 | Contributory (secondary) causes of death: ICD10 | I24.0 | Coronary thromb   | 1 |
| Coronary Artery Disease | 41202 | Diagnoses - main ICD10                          | I24.1 | Dressler's syndro | 1 |
| Coronary Artery Disease | 41204 | Diagnoses - secondary ICD10                     | I24.1 | Dressler's syndro | 1 |
| Coronary Artery Disease | 40001 | Underlying (primary) cause of death: ICD10      | I24.1 | Dressler's syndro | 1 |
| Coronary Artery Disease | 40002 | Contributory (secondary) causes of death: ICD10 | I24.1 | Dressler's syndro | 1 |
| Coronary Artery Disease | 41202 | Diagnoses - main ICD10                          | I24.8 | Other forms of a  | 1 |
| Coronary Artery Disease | 41204 | Diagnoses - secondary ICD10                     | I24.8 | Other forms of a  | 1 |
| Coronary Artery Disease | 40001 | Underlying (primary) cause of death: ICD10      | I24.8 | Other forms of a  | 1 |
| Coronary Artery Disease | 40002 | Contributory (secondary) causes of death: ICD10 | I24.8 | Other forms of a  | 1 |
| Coronary Artery Disease | 41202 | Diagnoses - main ICD10                          | I24.9 | Acute ischaemic   | 1 |
| Coronary Artery Disease | 41204 | Diagnoses - secondary ICD10                     | I24.9 | Acute ischaemic   | 1 |
| Coronary Artery Disease | 40001 | Underlying (primary) cause of death: ICD10      | I24.9 | Acute ischaemic   | 1 |
| Coronary Artery Disease | 40002 | Contributory (secondary) causes of death: ICD10 | I24.9 | Acute ischaemic   | 1 |
| Coronary Artery Disease | 41202 | Diagnoses - main ICD10                          | I25.1 | Atherosclerotic h | 1 |
| Coronary Artery Disease | 41204 | Diagnoses - secondary ICD10                     | I25.1 | Atherosclerotic h | 1 |
| Coronary Artery Disease | 40001 | Underlying (primary) cause of death: ICD10      | I25.1 | Atherosclerotic h | 1 |
| Coronary Artery Disease | 40002 | Contributory (secondary) causes of death: ICD10 | I25.1 | Atherosclerotic h | 1 |
| Coronary Artery Disease | 41202 | Diagnoses - main ICD10                          | I25.2 | Old myocardial in | 1 |
| Coronary Artery Disease | 41204 | Diagnoses - secondary ICD10                     | I25.2 | Old myocardial in | 1 |
| Coronary Artery Disease | 40001 | Underlying (primary) cause of death: ICD10      | I25.2 | Old myocardial in | 1 |

|                         |       |                                                 |       |                                 |   |
|-------------------------|-------|-------------------------------------------------|-------|---------------------------------|---|
| Coronary Artery Disease | 40002 | Contributory (secondary) causes of death: ICD10 | I25.2 | Old myocardial infarction       | 1 |
| Coronary Artery Disease | 41202 | Diagnoses - main ICD10                          | I25.5 | Ischaemic cardiomyopathy        | 1 |
| Coronary Artery Disease | 41204 | Diagnoses - secondary ICD10                     | I25.5 | Ischaemic cardiomyopathy        | 1 |
| Coronary Artery Disease | 40001 | Underlying (primary) cause of death: ICD10      | I25.5 | Ischaemic cardiomyopathy        | 1 |
| Coronary Artery Disease | 40002 | Contributory (secondary) causes of death: ICD10 | I25.5 | Ischaemic cardiomyopathy        | 1 |
| Coronary Artery Disease | 41202 | Diagnoses - main ICD10                          | I25.6 | Silent myocardial infarction    | 1 |
| Coronary Artery Disease | 41204 | Diagnoses - secondary ICD10                     | I25.6 | Silent myocardial infarction    | 1 |
| Coronary Artery Disease | 40001 | Underlying (primary) cause of death: ICD10      | I25.6 | Silent myocardial infarction    | 1 |
| Coronary Artery Disease | 40002 | Contributory (secondary) causes of death: ICD10 | I25.6 | Silent myocardial infarction    | 1 |
| Coronary Artery Disease | 41202 | Diagnoses - main ICD10                          | I25.8 | Other forms of cardiomyopathy   | 1 |
| Coronary Artery Disease | 41204 | Diagnoses - secondary ICD10                     | I25.8 | Other forms of cardiomyopathy   | 1 |
| Coronary Artery Disease | 40001 | Underlying (primary) cause of death: ICD10      | I25.8 | Other forms of cardiomyopathy   | 1 |
| Coronary Artery Disease | 40002 | Contributory (secondary) causes of death: ICD10 | I25.8 | Other forms of cardiomyopathy   | 1 |
| Coronary Artery Disease | 41202 | Diagnoses - main ICD10                          | I25.9 | Chronic ischaemic heart disease | 1 |
| Coronary Artery Disease | 41204 | Diagnoses - secondary ICD10                     | I25.9 | Chronic ischaemic heart disease | 1 |
| Coronary Artery Disease | 40001 | Underlying (primary) cause of death: ICD10      | I25.9 | Chronic ischaemic heart disease | 1 |
| Coronary Artery Disease | 40002 | Contributory (secondary) causes of death: ICD10 | I25.9 | Chronic ischaemic heart disease | 1 |
| Coronary Artery Disease | 41200 | Operative procedures - main OPCS                | K40   | Saphenous vein bypass grafting  | 1 |
| Coronary Artery Disease | 41210 | Operative procedures - secondary OPCS           | K40   | Saphenous vein bypass grafting  | 1 |
| Coronary Artery Disease | 41200 | Operative procedures - main OPCS                | K40.1 | Saphenous vein bypass grafting  | 1 |
| Coronary Artery Disease | 41210 | Operative procedures - secondary OPCS           | K40.1 | Saphenous vein bypass grafting  | 1 |



|                         |       |                                        |       |                   |   |
|-------------------------|-------|----------------------------------------|-------|-------------------|---|
| Coronary Artery Disease | 41200 | Operative procedures<br>main OPCS      | K40.2 | Saphenous vein    | 1 |
| Coronary Artery Disease | 41210 | Operative procedures<br>secondary OPCS | K40.2 | Saphenous vein    | 1 |
| Coronary Artery Disease | 41200 | Operative procedures<br>main OPCS      | K40.3 | Saphenous vein    | 1 |
| Coronary Artery Disease | 41210 | Operative procedures<br>secondary OPCS | K40.3 | Saphenous vein    | 1 |
| Coronary Artery Disease | 41200 | Operative procedures<br>main OPCS      | K40.4 | Saphenous vein    | 1 |
| Coronary Artery Disease | 41210 | Operative procedures<br>secondary OPCS | K40.4 | Saphenous vein    | 1 |
| Coronary Artery Disease | 41200 | Operative procedures<br>main OPCS      | K40.8 | Other specified s | 1 |
| Coronary Artery Disease | 41210 | Operative procedures<br>secondary OPCS | K40.8 | Other specified s | 1 |
| Coronary Artery Disease | 41200 | Operative procedures<br>main OPCS      | K40.9 | Unspecified saph  | 1 |
| Coronary Artery Disease | 41210 | Operative procedures<br>secondary OPCS | K40.9 | Unspecified saph  | 1 |
| Coronary Artery Disease | 41200 | Operative procedures<br>main OPCS      | K41   | Other autograft r | 1 |
| Coronary Artery Disease | 41210 | Operative procedures<br>secondary OPCS | K41   | Other autograft r | 1 |
| Coronary Artery Disease | 41200 | Operative procedures<br>main OPCS      | K41.1 | Autograft replace | 1 |
| Coronary Artery Disease | 41210 | Operative procedures<br>secondary OPCS | K41.1 | Autograft replace | 1 |
| Coronary Artery Disease | 41200 | Operative procedures<br>main OPCS      | K41.2 | Autograft replace | 1 |
| Coronary Artery Disease | 41210 | Operative procedures<br>secondary OPCS | K41.2 | Autograft replace | 1 |
| Coronary Artery Disease | 41200 | Operative procedures<br>main OPCS      | K41.3 | Autograft replace | 1 |
| Coronary Artery Disease | 41210 | Operative procedures<br>secondary OPCS | K41.3 | Autograft replace | 1 |
| Coronary Artery Disease | 41200 | Operative procedures<br>main OPCS      | K41.4 | Autograft replace | 1 |
| Coronary Artery Disease | 41210 | Operative procedures<br>secondary OPCS | K41.4 | Autograft replace | 1 |
| Coronary Artery Disease | 41200 | Operative procedures<br>main OPCS      | K41.8 | Other specified c | 1 |
| Coronary Artery Disease | 41210 | Operative procedures<br>secondary OPCS | K41.8 | Other specified c | 1 |
| Coronary Artery Disease | 41200 | Operative procedures<br>main OPCS      | K41.9 | Unspecified othe  | 1 |
| Coronary Artery Disease | 41210 | Operative procedures<br>secondary OPCS | K41.9 | Unspecified othe  | 1 |
| Coronary Artery Disease | 41200 | Operative procedures<br>main OPCS      | K42   | Allograft replace | 1 |
| Coronary Artery Disease | 41210 | Operative procedures<br>secondary OPCS | K42   | Allograft replace | 1 |

|                         |       |                                       |       |                   |   |
|-------------------------|-------|---------------------------------------|-------|-------------------|---|
| Coronary Artery Disease | 41200 | Operative procedures - main OPCS      | K42.1 | Allograft replace | 1 |
| Coronary Artery Disease | 41210 | Operative procedures - secondary OPCS | K42.1 | Allograft replace | 1 |
| Coronary Artery Disease | 41200 | Operative procedures - main OPCS      | K42.2 | Allograft replace | 1 |
| Coronary Artery Disease | 41210 | Operative procedures - secondary OPCS | K42.2 | Allograft replace | 1 |
| Coronary Artery Disease | 41200 | Operative procedures - main OPCS      | K42.3 | Allograft replace | 1 |
| Coronary Artery Disease | 41210 | Operative procedures - secondary OPCS | K42.3 | Allograft replace | 1 |
| Coronary Artery Disease | 41200 | Operative procedures - main OPCS      | K42.4 | Allograft replace | 1 |
| Coronary Artery Disease | 41210 | Operative procedures - secondary OPCS | K42.4 | Allograft replace | 1 |
| Coronary Artery Disease | 41200 | Operative procedures - main OPCS      | K42.8 | Other specified a | 1 |
| Coronary Artery Disease | 41210 | Operative procedures - secondary OPCS | K42.8 | Other specified a | 1 |
| Coronary Artery Disease | 41200 | Operative procedures - main OPCS      | K42.9 | Unspecified allog | 1 |
| Coronary Artery Disease | 41210 | Operative procedures - secondary OPCS | K42.9 | Unspecified allog | 1 |
| Coronary Artery Disease | 41200 | Operative procedures - main OPCS      | K43   | Prosthetic replac | 1 |
| Coronary Artery Disease | 41210 | Operative procedures - secondary OPCS | K43   | Prosthetic replac | 1 |
| Coronary Artery Disease | 41200 | Operative procedures - main OPCS      | K43.1 | Prosthetic replac | 1 |
| Coronary Artery Disease | 41210 | Operative procedures - secondary OPCS | K43.1 | Prosthetic replac | 1 |
| Coronary Artery Disease | 41200 | Operative procedures - main OPCS      | K43.2 | Prosthetic replac | 1 |
| Coronary Artery Disease | 41210 | Operative procedures - secondary OPCS | K43.2 | Prosthetic replac | 1 |
| Coronary Artery Disease | 41200 | Operative procedures - main OPCS      | K43.3 | Prosthetic replac | 1 |
| Coronary Artery Disease | 41210 | Operative procedures - secondary OPCS | K43.3 | Prosthetic replac | 1 |
| Coronary Artery Disease | 41200 | Operative procedures - main OPCS      | K43.4 | Prosthetic replac | 1 |
| Coronary Artery Disease | 41210 | Operative procedures - secondary OPCS | K43.4 | Prosthetic replac | 1 |
| Coronary Artery Disease | 41200 | Operative procedures - main OPCS      | K43.8 | Other specified p | 1 |
| Coronary Artery Disease | 41210 | Operative procedures - secondary OPCS | K43.8 | Other specified p | 1 |
| Coronary Artery Disease | 41200 | Operative procedures - main OPCS      | K43.9 | Unspecified pros  | 1 |
| Coronary Artery Disease | 41210 | Operative procedures - secondary OPCS | K43.9 | Unspecified pros  | 1 |

|                         |       |                                       |       |                   |   |
|-------------------------|-------|---------------------------------------|-------|-------------------|---|
| Coronary Artery Disease | 41200 | Operative procedures - main OPCS      | K44   | Other replacement | 1 |
| Coronary Artery Disease | 41210 | Operative procedures - secondary OPCS | K44   | Other replacement | 1 |
| Coronary Artery Disease | 41200 | Operative procedures - main OPCS      | K44.1 | Replacement of    | 1 |
| Coronary Artery Disease | 41210 | Operative procedures - secondary OPCS | K44.1 | Replacement of    | 1 |
| Coronary Artery Disease | 41200 | Operative procedures - main OPCS      | K44.2 | Revision of repla | 1 |
| Coronary Artery Disease | 41210 | Operative procedures - secondary OPCS | K44.2 | Revision of repla | 1 |
| Coronary Artery Disease | 41200 | Operative procedures - main OPCS      | K44.8 | Other specified c | 1 |
| Coronary Artery Disease | 41210 | Operative procedures - secondary OPCS | K44.8 | Other specified c | 1 |
| Coronary Artery Disease | 41200 | Operative procedures - main OPCS      | K44.9 | Unspecified othe  | 1 |
| Coronary Artery Disease | 41210 | Operative procedures - secondary OPCS | K44.9 | Unspecified othe  | 1 |
| Coronary Artery Disease | 41200 | Operative procedures - main OPCS      | K45.1 | Double anastom    | 1 |
| Coronary Artery Disease | 41210 | Operative procedures - secondary OPCS | K45.1 | Double anastom    | 1 |
| Coronary Artery Disease | 41200 | Operative procedures - main OPCS      | K45.2 | Double anastom    | 1 |
| Coronary Artery Disease | 41210 | Operative procedures - secondary OPCS | K45.2 | Double anastom    | 1 |
| Coronary Artery Disease | 41200 | Operative procedures - main OPCS      | K45.3 | Anastomosis of r  | 1 |
| Coronary Artery Disease | 41210 | Operative procedures - secondary OPCS | K45.3 | Anastomosis of r  | 1 |
| Coronary Artery Disease | 41200 | Operative procedures - main OPCS      | K45.4 | Anastomosis of r  | 1 |
| Coronary Artery Disease | 41210 | Operative procedures - secondary OPCS | K45.4 | Anastomosis of r  | 1 |
| Coronary Artery Disease | 41200 | Operative procedures - main OPCS      | K45.5 | Anastomosis of t  | 1 |
| Coronary Artery Disease | 41210 | Operative procedures - secondary OPCS | K45.5 | Anastomosis of t  | 1 |
| Coronary Artery Disease | 41200 | Operative procedures - main OPCS      | K45.6 | Revision of conn  | 1 |
| Coronary Artery Disease | 41210 | Operative procedures - secondary OPCS | K45.6 | Revision of conn  | 1 |
| Coronary Artery Disease | 41200 | Operative procedures - main OPCS      | K45.8 | Other specified c | 1 |
| Coronary Artery Disease | 41210 | Operative procedures - secondary OPCS | K45.8 | Other specified c | 1 |
| Coronary Artery Disease | 41200 | Operative procedures - main OPCS      | K45.9 | Unspecified con   | 1 |
| Coronary Artery Disease | 41210 | Operative procedures - secondary OPCS | K45.9 | Unspecified con   | 1 |

|                         |       |                                       |       |                   |   |
|-------------------------|-------|---------------------------------------|-------|-------------------|---|
| Coronary Artery Disease | 41200 | Operative procedures - main OPCS      | K46   | Other bypass of   | 1 |
| Coronary Artery Disease | 41210 | Operative procedures - secondary OPCS | K46   | Other bypass of   | 1 |
| Coronary Artery Disease | 41200 | Operative procedures - main OPCS      | K46.1 | Double implanta   | 1 |
| Coronary Artery Disease | 41210 | Operative procedures - secondary OPCS | K46.1 | Double implanta   | 1 |
| Coronary Artery Disease | 41200 | Operative procedures - main OPCS      | K46.2 | Double implanta   | 1 |
| Coronary Artery Disease | 41210 | Operative procedures - secondary OPCS | K46.2 | Double implanta   | 1 |
| Coronary Artery Disease | 41200 | Operative procedures - main OPCS      | K46.3 | Implantation of n | 1 |
| Coronary Artery Disease | 41210 | Operative procedures - secondary OPCS | K46.3 | Implantation of n | 1 |
| Coronary Artery Disease | 41200 | Operative procedures - main OPCS      | K46.4 | Implantation of t | 1 |
| Coronary Artery Disease | 41210 | Operative procedures - secondary OPCS | K46.4 | Implantation of t | 1 |
| Coronary Artery Disease | 41200 | Operative procedures - main OPCS      | K46.5 | Revision of impla | 1 |
| Coronary Artery Disease | 41210 | Operative procedures - secondary OPCS | K46.5 | Revision of impla | 1 |
| Coronary Artery Disease | 41200 | Operative procedures - main OPCS      | K46.8 | Other specified c | 1 |
| Coronary Artery Disease | 41210 | Operative procedures - secondary OPCS | K46.8 | Other specified c | 1 |
| Coronary Artery Disease | 41200 | Operative procedures - main OPCS      | K46.9 | Unspecified othe  | 1 |
| Coronary Artery Disease | 41210 | Operative procedures - secondary OPCS | K46.9 | Unspecified othe  | 1 |
| Coronary Artery Disease | 41200 | Operative procedures - main OPCS      | K49.1 | Percutaneous tra  | 1 |
| Coronary Artery Disease | 41210 | Operative procedures - secondary OPCS | K49.1 | Percutaneous tra  | 1 |
| Coronary Artery Disease | 41200 | Operative procedures - main OPCS      | K49.2 | Percutaneous tra  | 1 |
| Coronary Artery Disease | 41210 | Operative procedures - secondary OPCS | K49.2 | Percutaneous tra  | 1 |
| Coronary Artery Disease | 41200 | Operative procedures - main OPCS      | K49.3 | Percutaneous tra  | 1 |
| Coronary Artery Disease | 41210 | Operative procedures - secondary OPCS | K49.3 | Percutaneous tra  | 1 |
| Coronary Artery Disease | 41200 | Operative procedures - main OPCS      | K49.4 | Percutaneous tra  | 1 |
| Coronary Artery Disease | 41210 | Operative procedures - secondary OPCS | K49.4 | Percutaneous tra  | 1 |
| Coronary Artery Disease | 41200 | Operative procedures - main OPCS      | K49.8 | Other specified t | 1 |
| Coronary Artery Disease | 41210 | Operative procedures - secondary OPCS | K49.8 | Other specified t | 1 |

|                         |       |                                       |       |                   |   |
|-------------------------|-------|---------------------------------------|-------|-------------------|---|
| Coronary Artery Disease | 41200 | Operative procedures - main OPCS      | K49.9 | Unspecified trans | 1 |
| Coronary Artery Disease | 41210 | Operative procedures - secondary OPCS | K49.9 | Unspecified trans | 1 |
| Coronary Artery Disease | 41200 | Operative procedures - main OPCS      | K50.1 | Percutaneous tra  | 1 |
| Coronary Artery Disease | 41210 | Operative procedures - secondary OPCS | K50.1 | Percutaneous tra  | 1 |
| Coronary Artery Disease | 41200 | Operative procedures - main OPCS      | K50.2 | Percutaneous tra  | 1 |
| Coronary Artery Disease | 41210 | Operative procedures - secondary OPCS | K50.2 | Percutaneous tra  | 1 |
| Coronary Artery Disease | 41200 | Operative procedures - main OPCS      | K50.4 | Percutaneous tra  | 1 |
| Coronary Artery Disease | 41210 | Operative procedures - secondary OPCS | K50.4 | Percutaneous tra  | 1 |
| Coronary Artery Disease | 41200 | Operative procedures - main OPCS      | K75.1 | Percutaneous tra  | 1 |
| Coronary Artery Disease | 41210 | Operative procedures - secondary OPCS | K75.1 | Percutaneous tra  | 1 |
| Coronary Artery Disease | 41200 | Operative procedures - main OPCS      | K75.2 | Percutaneous tra  | 1 |
| Coronary Artery Disease | 41210 | Operative procedures - secondary OPCS | K75.2 | Percutaneous tra  | 1 |
| Coronary Artery Disease | 41200 | Operative procedures - main OPCS      | K75.3 | Percutaneous tra  | 1 |
| Coronary Artery Disease | 41210 | Operative procedures - secondary OPCS | K75.3 | Percutaneous tra  | 1 |
| Coronary Artery Disease | 41200 | Operative procedures - main OPCS      | K75.4 | Percutaneous tra  | 1 |
| Coronary Artery Disease | 41210 | Operative procedures - secondary OPCS | K75.4 | Percutaneous tra  | 1 |
| Coronary Artery Disease | 41200 | Operative procedures - main OPCS      | K75.8 | Other specified p | 1 |
| Coronary Artery Disease | 41210 | Operative procedures - secondary OPCS | K75.8 | Other specified p | 1 |
| Coronary Artery Disease | 41200 | Operative procedures - main OPCS      | K75.9 | Unspecified perc  | 1 |
| Coronary Artery Disease | 41210 | Operative procedures - secondary OPCS | K75.9 | Unspecified perc  | 1 |
| Coronary Artery Disease | 41203 | Diagnoses - main ICD9                 | 410   | Acute myocardia   | 1 |
| Coronary Artery Disease | 41205 | Diagnoses - secondary ICD9            | 410   | Acute myocardia   | 1 |
| Coronary Artery Disease | 41203 | Diagnoses - main ICD9                 | 4109  | Acute myocardia   | 1 |
| Coronary Artery Disease | 41205 | Diagnoses - secondary ICD9            | 4109  | Acute myocardia   | 1 |
| Coronary Artery Disease | 41203 | Diagnoses - main ICD9                 | 411   | Other acute and   | 1 |
| Coronary Artery Disease | 41205 | Diagnoses - secondary ICD9            | 411   | Other acute and   | 1 |

|                         |       |                                     |       |                    |   |
|-------------------------|-------|-------------------------------------|-------|--------------------|---|
| Coronary Artery Disease | 41203 | Diagnoses - main ICD9               | 4119  | Other acute and    | 1 |
| Coronary Artery Disease | 41205 | Diagnoses - secondary ICD9          | 4119  | Other acute and    | 1 |
| Coronary Artery Disease | 41203 | Diagnoses - main ICD9               | 412   | Old myocardial inf | 1 |
| Coronary Artery Disease | 41205 | Diagnoses - secondary ICD9          | 412   | Old myocardial inf | 1 |
| Coronary Artery Disease | 41203 | Diagnoses - main ICD9               | 4129  | Old myocardial inf | 1 |
| Coronary Artery Disease | 41205 | Diagnoses - secondary ICD9          | 4129  | Old myocardial inf | 1 |
| Coronary Artery Disease | 41203 | Diagnoses - main ICD9               | 413   | Angina pectoris    | 1 |
| Coronary Artery Disease | 41205 | Diagnoses - secondary ICD9          | 413   | Angina pectoris    | 1 |
| Coronary Artery Disease | 41203 | Diagnoses - main ICD9               | 4139  | Angina pectoris    | 1 |
| Coronary Artery Disease | 41205 | Diagnoses - secondary ICD9          | 4139  | Angina pectoris    | 1 |
| Coronary Artery Disease | 41203 | Diagnoses - main ICD9               | 4140  | Coronary atheros   | 1 |
| Coronary Artery Disease | 41205 | Diagnoses - secondary ICD9          | 4140  | Coronary atheros   | 1 |
| Coronary Artery Disease | 41203 | Diagnoses - main ICD9               | 4148  | Other specified f  | 1 |
| Coronary Artery Disease | 41205 | Diagnoses - secondary ICD9          | 4148  | Other specified f  | 1 |
| Coronary Artery Disease | 41203 | Diagnoses - main ICD9               | 4149  | Chronic ischaem    | 1 |
| Coronary Artery Disease | 41205 | Diagnoses - secondary ICD9          | 4149  | Chronic ischaem    | 1 |
| Coronary Artery Disease | 41200 | Operative procedures main OPCS      | K40.1 | Saphenous vein     | 1 |
| Coronary Artery Disease | 41210 | Operative procedures secondary OPCS | K40.1 | Saphenous vein     | 1 |
| Coronary Artery Disease | 41200 | Operative procedures main OPCS      | K40.2 | Saphenous vein     | 1 |
| Coronary Artery Disease | 41210 | Operative procedures secondary OPCS | K40.2 | Saphenous vein     | 1 |
| Coronary Artery Disease | 41200 | Operative procedures main OPCS      | K40.3 | Saphenous vein     | 1 |
| Coronary Artery Disease | 41210 | Operative procedures secondary OPCS | K40.3 | Saphenous vein     | 1 |
| Coronary Artery Disease | 41200 | Operative procedures main OPCS      | K40.4 | Saphenous vein     | 1 |
| Coronary Artery Disease | 41210 | Operative procedures secondary OPCS | K40.4 | Saphenous vein     | 1 |
| Coronary Artery Disease | 41200 | Operative procedures main OPCS      | K41.1 | Autograft replac   | 1 |

|                         |       |                                     |       |                              |   |
|-------------------------|-------|-------------------------------------|-------|------------------------------|---|
| Coronary Artery Disease | 41210 | Operative procedures secondary OPCS | K41.1 | Autograft replacement        | 1 |
| Coronary Artery Disease | 41200 | Operative procedures main OPCS      | K41.2 | Autograft replacement        | 1 |
| Coronary Artery Disease | 41210 | Operative procedures secondary OPCS | K41.2 | Autograft replacement        | 1 |
| Coronary Artery Disease | 41200 | Operative procedures main OPCS      | K41.3 | Autograft replacement        | 1 |
| Coronary Artery Disease | 41210 | Operative procedures secondary OPCS | K41.3 | Autograft replacement        | 1 |
| Coronary Artery Disease | 41200 | Operative procedures main OPCS      | K41.4 | Autograft replacement        | 1 |
| Coronary Artery Disease | 41210 | Operative procedures secondary OPCS | K41.4 | Autograft replacement        | 1 |
| Coronary Artery Disease | 41200 | Operative procedures main OPCS      | K45.1 | Double anastomosis           | 1 |
| Coronary Artery Disease | 41210 | Operative procedures secondary OPCS | K45.1 | Double anastomosis           | 1 |
| Coronary Artery Disease | 41200 | Operative procedures main OPCS      | K45.2 | Double anastomosis           | 1 |
| Coronary Artery Disease | 41210 | Operative procedures secondary OPCS | K45.2 | Double anastomosis           | 1 |
| Coronary Artery Disease | 41200 | Operative procedures main OPCS      | K45.3 | Anastomosis of               | 1 |
| Coronary Artery Disease | 41210 | Operative procedures secondary OPCS | K45.3 | Anastomosis of               | 1 |
| Coronary Artery Disease | 41200 | Operative procedures main OPCS      | K45.4 | Anastomosis of               | 1 |
| Coronary Artery Disease | 41210 | Operative procedures secondary OPCS | K45.4 | Anastomosis of               | 1 |
| Coronary Artery Disease | 41200 | Operative procedures main OPCS      | K45.5 | Anastomosis of               | 1 |
| Coronary Artery Disease | 41210 | Operative procedures secondary OPCS | K45.5 | Anastomosis of               | 1 |
| Coronary Artery Disease | 41200 | Operative procedures main OPCS      | K49.1 | Percutaneous transluminal    | 1 |
| Coronary Artery Disease | 41210 | Operative procedures secondary OPCS | K49.1 | Percutaneous transluminal    | 1 |
| Coronary Artery Disease | 41200 | Operative procedures main OPCS      | K49.2 | Percutaneous transluminal    | 1 |
| Coronary Artery Disease | 41210 | Operative procedures secondary OPCS | K49.2 | Percutaneous transluminal    | 1 |
| Coronary Artery Disease | 41200 | Operative procedures main OPCS      | K49.8 | Other specified transluminal | 1 |
| Coronary Artery Disease | 41210 | Operative procedures secondary OPCS | K49.8 | Other specified transluminal | 1 |
| Coronary Artery Disease | 41200 | Operative procedures main OPCS      | K49.9 | Unspecified transluminal     | 1 |
| Coronary Artery Disease | 41210 | Operative procedures secondary OPCS | K49.9 | Unspecified transluminal     | 1 |
| Coronary Artery Disease | 41200 | Operative procedures main OPCS      | K50.2 | Percutaneous transluminal    | 1 |

|                         |       |                                                 |       |                    |   |
|-------------------------|-------|-------------------------------------------------|-------|--------------------|---|
| Coronary Artery Disease | 41210 | Operative procedures - secondary OPCS           | K50.2 | Percutaneous tra   | 1 |
| Coronary Artery Disease | 41200 | Operative procedures - main OPCS                | K75.1 | Percutaneous tra   | 1 |
| Coronary Artery Disease | 41210 | Operative procedures - secondary OPCS           | K75.1 | Percutaneous tra   | 1 |
| Coronary Artery Disease | 41200 | Operative procedures - main OPCS                | K75.2 | Percutaneous tra   | 1 |
| Coronary Artery Disease | 41210 | Operative procedures - secondary OPCS           | K75.2 | Percutaneous tra   | 1 |
| Coronary Artery Disease | 41200 | Operative procedures - main OPCS                | K75.3 | Percutaneous tra   | 1 |
| Coronary Artery Disease | 41210 | Operative procedures - secondary OPCS           | K75.3 | Percutaneous tra   | 1 |
| Coronary Artery Disease | 41200 | Operative procedures - main OPCS                | K75.4 | Percutaneous tra   | 1 |
| Coronary Artery Disease | 41210 | Operative procedures - secondary OPCS           | K75.4 | Percutaneous tra   | 1 |
| Coronary Artery Disease | 41200 | Operative procedures - main OPCS                | K75.8 | Other specified p  | 1 |
| Coronary Artery Disease | 41210 | Operative procedures - secondary OPCS           | K75.8 | Other specified p  | 1 |
| Coronary Artery Disease | 41200 | Operative procedures - main OPCS                | K75.9 | Unspecified perc   | 1 |
| Coronary Artery Disease | 41210 | Operative procedures - secondary OPCS           | K75.9 | Unspecified perc   | 1 |
| Coronary Artery Disease | 42001 | Source of first MI                              | 0     | Self-report only   | 1 |
| Coronary Artery Disease | 42001 | Source of first MI                              | 1     | Hospital admissi   | 1 |
| Coronary Artery Disease | 42001 | Source of first MI                              | 2     | Death only         | 1 |
| Heart Failure           | 20002 | Non-cancer illness code, self-reported          | 1076  | Heart failure/pulm | 1 |
| Heart Failure           | 20002 | Non-cancer illness code, self-reported          | 1079  | Cardiomyopathy     | 1 |
| Heart Failure           | 20002 | Non-cancer illness code, self-reported          | 1588  | Hypertrophic car   | 0 |
| Heart Failure           | 41202 | Diagnoses - main ICD10                          | I11.0 | Hypertensive he    | 1 |
| Heart Failure           | 41204 | Diagnoses - secondary ICD10                     | I11.0 | Hypertensive he    | 1 |
| Heart Failure           | 40001 | Underlying (primary) cause of death: ICD10      | I11.0 | Hypertensive he    | 1 |
| Heart Failure           | 40002 | Contributory (secondary) causes of death: ICD10 | I11.0 | Hypertensive he    | 1 |
| Heart Failure           | 41202 | Diagnoses - main ICD10                          | I13.0 | Hypertensive he    | 1 |
| Heart Failure           | 41204 | Diagnoses - secondary ICD10                     | I13.0 | Hypertensive he    | 1 |



|               |       |                                                 |       |                  |   |
|---------------|-------|-------------------------------------------------|-------|------------------|---|
| Heart Failure | 40001 | Underlying (primary) cause of death: ICD10      | I13.0 | Hypertensive he  | 1 |
| Heart Failure | 40002 | Contributory (secondary) causes of death: ICD10 | I13.0 | Hypertensive he  | 1 |
| Heart Failure | 41202 | Diagnoses - main ICD10                          | I13.2 | Hypertensive he  | 1 |
| Heart Failure | 41204 | Diagnoses - secondary ICD10                     | I13.2 | Hypertensive he  | 1 |
| Heart Failure | 40001 | Underlying (primary) cause of death: ICD10      | I13.2 | Hypertensive he  | 1 |
| Heart Failure | 40002 | Contributory (secondary) causes of death: ICD10 | I13.2 | Hypertensive he  | 1 |
| Heart Failure | 41202 | Diagnoses - main ICD10                          | I25.5 | Ischaemic cardio | 1 |
| Heart Failure | 41204 | Diagnoses - secondary ICD10                     | I25.5 | Ischaemic cardio | 1 |
| Heart Failure | 40001 | Underlying (primary) cause of death: ICD10      | I25.5 | Ischaemic cardio | 1 |
| Heart Failure | 40002 | Contributory (secondary) causes of death: ICD10 | I25.5 | Ischaemic cardio | 1 |
| Heart Failure | 41202 | Diagnoses - main ICD10                          | I42.0 | Dilated cardiomy | 1 |
| Heart Failure | 41204 | Diagnoses - secondary ICD10                     | I42.0 | Dilated cardiomy | 1 |
| Heart Failure | 40001 | Underlying (primary) cause of death: ICD10      | I42.0 | Dilated cardiomy | 1 |
| Heart Failure | 40002 | Contributory (secondary) causes of death: ICD10 | I42.0 | Dilated cardiomy | 1 |
| Heart Failure | 41202 | Diagnoses - main ICD10                          | I42.1 | Obstructive hype | 0 |
| Heart Failure | 41204 | Diagnoses - secondary ICD10                     | I42.1 | Obstructive hype | 0 |
| Heart Failure | 40001 | Underlying (primary) cause of death: ICD10      | I42.1 | Obstructive hype | 0 |
| Heart Failure | 40002 | Contributory (secondary) causes of death: ICD10 | I42.1 | Obstructive hype | 0 |
| Heart Failure | 41202 | Diagnoses - main ICD10                          | I42.2 | Other hypertroph | 0 |
| Heart Failure | 41204 | Diagnoses - secondary ICD10                     | I42.2 | Other hypertroph | 0 |

|               |       |                                                 |       |                   |   |
|---------------|-------|-------------------------------------------------|-------|-------------------|---|
| Heart Failure | 40001 | Underlying (primary) cause of death: ICD10      | I42.2 | Other hypertroph  | 0 |
| Heart Failure | 40002 | Contributory (secondary) causes of death: ICD10 | I42.2 | Other hypertroph  | 0 |
| Heart Failure | 41202 | Diagnoses - main ICD10                          | I42.5 | Other restrictive | 1 |
| Heart Failure | 41204 | Diagnoses - secondary ICD10                     | I42.5 | Other restrictive | 1 |
| Heart Failure | 40001 | Underlying (primary) cause of death: ICD10      | I42.5 | Other restrictive | 1 |
| Heart Failure | 40002 | Contributory (secondary) causes of death: ICD10 | I42.5 | Other restrictive | 1 |
| Heart Failure | 41202 | Diagnoses - main ICD10                          | I42.8 | Other cardiomyo   | 1 |
| Heart Failure | 41204 | Diagnoses - secondary ICD10                     | I42.8 | Other cardiomyo   | 1 |
| Heart Failure | 40001 | Underlying (primary) cause of death: ICD10      | I42.8 | Other cardiomyo   | 1 |
| Heart Failure | 40002 | Contributory (secondary) causes of death: ICD10 | I42.8 | Other cardiomyo   | 1 |
| Heart Failure | 41202 | Diagnoses - main ICD10                          | I42.9 | Cardiomyopathy    | 1 |
| Heart Failure | 41204 | Diagnoses - secondary ICD10                     | I42.9 | Cardiomyopathy    | 1 |
| Heart Failure | 40001 | Underlying (primary) cause of death: ICD10      | I42.9 | Cardiomyopathy    | 1 |
| Heart Failure | 40002 | Contributory (secondary) causes of death: ICD10 | I42.9 | Cardiomyopathy    | 1 |
| Heart Failure | 41202 | Diagnoses - main ICD10                          | I50   | Heart failure     | 1 |
| Heart Failure | 41204 | Diagnoses - secondary ICD10                     | I50   | Heart failure     | 1 |
| Heart Failure | 40001 | Underlying (primary) cause of death: ICD10      | I50   | Heart failure     | 1 |
| Heart Failure | 40002 | Contributory (secondary) causes of death: ICD10 | I50   | Heart failure     | 1 |
| Heart Failure | 41202 | Diagnoses - main ICD10                          | I50.0 | Congestive hear   | 1 |
| Heart Failure | 41204 | Diagnoses - secondary ICD10                     | I50.0 | Congestive hear   | 1 |

|                             |       |                                                 |       |                                 |   |
|-----------------------------|-------|-------------------------------------------------|-------|---------------------------------|---|
| Heart Failure               | 40001 | Underlying (primary) cause of death: ICD10      | I50.0 | Congestive heart failure        | 1 |
| Heart Failure               | 40002 | Contributory (secondary) causes of death: ICD10 | I50.0 | Congestive heart failure        | 1 |
| Heart Failure               | 41202 | Diagnoses - main ICD10                          | I50.1 | Left ventricular failure        | 1 |
| Heart Failure               | 41204 | Diagnoses - secondary ICD10                     | I50.1 | Left ventricular failure        | 1 |
| Heart Failure               | 40001 | Underlying (primary) cause of death: ICD10      | I50.1 | Left ventricular failure        | 1 |
| Heart Failure               | 40002 | Contributory (secondary) causes of death: ICD10 | I50.1 | Left ventricular failure        | 1 |
| Heart Failure               | 41202 | Diagnoses - main ICD10                          | I50.9 | Heart failure, unspecified      | 1 |
| Heart Failure               | 41204 | Diagnoses - secondary ICD10                     | I50.9 | Heart failure, unspecified      | 1 |
| Heart Failure               | 40001 | Underlying (primary) cause of death: ICD10      | I50.9 | Heart failure, unspecified      | 1 |
| Heart Failure               | 40002 | Contributory (secondary) causes of death: ICD10 | I50.9 | Heart failure, unspecified      | 1 |
| Heart Failure               | 41203 | Diagnoses - main ICD9                           | 4254  | Other primary cardiac diagnosis | 1 |
| Heart Failure               | 41205 | Diagnoses - secondary ICD9                      | 4254  | Other primary cardiac diagnosis | 1 |
| Heart Failure               | 41203 | Diagnoses - main ICD9                           | 4280  | Congestive heart failure        | 1 |
| Heart Failure               | 41205 | Diagnoses - secondary ICD9                      | 4280  | Congestive heart failure        | 1 |
| Heart Failure               | 41203 | Diagnoses - main ICD9                           | 4281  | Left heart failure              | 1 |
| Heart Failure               | 41205 | Diagnoses - secondary ICD9                      | 4281  | Left heart failure              | 1 |
| Heart Failure               | 40001 | Diagnoses - main ICD9                           | 4289  | Heart failure, unspecified      | 1 |
| Heart Failure               | 40002 | Diagnoses - secondary ICD9                      | 4289  | Heart failure, unspecified      | 1 |
| Peripheral vascular disease | 20002 | Non-cancer illness code, self-reported          | 1067  | Peripheral vascular disease     | 1 |
| Peripheral vascular disease | 20002 | Non-cancer illness code, self-reported          | 1087  | Leg claudication                | 1 |
| Peripheral vascular disease | 20002 | Non-cancer illness code, self-reported          | 1088  | Arterial embolism               | 1 |
| Peripheral vascular disease | 20004 | Operation code, self-reported                   | 1102  | Fem-pop bypass                  | 1 |

|                             |       |                                                 |        |                   |   |
|-----------------------------|-------|-------------------------------------------------|--------|-------------------|---|
| Peripheral vascular disease | 20004 | Operation code, self-reported                   | 1108   | Leg artery angio  | 1 |
| Peripheral vascular disease | 20004 | Operation code, self-reported                   | 1440   | Amputation of le  | 1 |
| Peripheral vascular disease | 41202 | Diagnoses - main ICD10                          | I70.0  | Atherosclerosis d | 1 |
| Peripheral vascular disease | 41204 | Diagnoses - secondary ICD10                     | I70.0  | Atherosclerosis d | 1 |
| Peripheral vascular disease | 40001 | Underlying (primary) cause of death: ICD10      | I70.0  | Atherosclerosis d | 1 |
| Peripheral vascular disease | 40002 | Contributory (secondary) causes of death: ICD10 | I70.0  | Atherosclerosis d | 1 |
| Peripheral vascular disease | 41202 | Diagnoses - main ICD10                          | I70.00 | Atherosclerosis d | 1 |
| Peripheral vascular disease | 41204 | Diagnoses - secondary ICD10                     | I70.00 | Atherosclerosis d | 1 |
| Peripheral vascular disease | 40001 | Underlying (primary) cause of death: ICD10      | I70.00 | Atherosclerosis d | 1 |
| Peripheral vascular disease | 40002 | Contributory (secondary) causes of death: ICD10 | I70.00 | Atherosclerosis d | 1 |
| Peripheral vascular disease | 41202 | Diagnoses - main ICD10                          | I70.01 | Atherosclerosis d | 1 |
| Peripheral vascular disease | 41204 | Diagnoses - secondary ICD10                     | I70.01 | Atherosclerosis d | 1 |
| Peripheral vascular disease | 40001 | Underlying (primary) cause of death: ICD10      | I70.01 | Atherosclerosis d | 1 |
| Peripheral vascular disease | 40002 | Contributory (secondary) causes of death: ICD10 | I70.01 | Atherosclerosis d | 1 |
| Peripheral vascular disease | 41202 | Diagnoses - main ICD10                          | I70.2  | Atherosclerosis d | 1 |
| Peripheral vascular disease | 41204 | Diagnoses - secondary ICD10                     | I70.2  | Atherosclerosis d | 1 |
| Peripheral vascular disease | 40001 | Underlying (primary) cause of death: ICD10      | I70.2  | Atherosclerosis d | 1 |
| Peripheral vascular disease | 40002 | Contributory (secondary) causes of death: ICD10 | I70.2  | Atherosclerosis d | 1 |
| Peripheral vascular disease | 41202 | Diagnoses - main ICD10                          | I70.20 | Atherosclerosis d | 1 |
| Peripheral vascular disease | 41204 | Diagnoses - secondary ICD10                     | I70.20 | Atherosclerosis d | 1 |

|                             |       |                                                 |        |                   |   |
|-----------------------------|-------|-------------------------------------------------|--------|-------------------|---|
| Peripheral vascular disease | 40001 | Underlying (primary) cause of death: ICD10      | I70.20 | Atherosclerosis d | 1 |
| Peripheral vascular disease | 40002 | Contributory (secondary) causes of death: ICD10 | I70.20 | Atherosclerosis d | 1 |
| Peripheral vascular disease | 41202 | Diagnoses - main ICD10                          | I70.21 | Atherosclerosis d | 1 |
| Peripheral vascular disease | 41204 | Diagnoses - secondary ICD10                     | I70.21 | Atherosclerosis d | 1 |
| Peripheral vascular disease | 40001 | Underlying (primary) cause of death: ICD10      | I70.21 | Atherosclerosis d | 1 |
| Peripheral vascular disease | 40002 | Contributory (secondary) causes of death: ICD10 | I70.21 | Atherosclerosis d | 1 |
| Peripheral vascular disease | 41202 | Diagnoses - main ICD10                          | I70.8  | Atherosclerosis d | 1 |
| Peripheral vascular disease | 41204 | Diagnoses - secondary ICD10                     | I70.8  | Atherosclerosis d | 1 |
| Peripheral vascular disease | 40001 | Underlying (primary) cause of death: ICD10      | I70.8  | Atherosclerosis d | 1 |
| Peripheral vascular disease | 40002 | Contributory (secondary) causes of death: ICD10 | I70.8  | Atherosclerosis d | 1 |
| Peripheral vascular disease | 41202 | Diagnoses - main ICD10                          | I70.80 | Atherosclerosis d | 1 |
| Peripheral vascular disease | 41204 | Diagnoses - secondary ICD10                     | I70.80 | Atherosclerosis d | 1 |
| Peripheral vascular disease | 40001 | Underlying (primary) cause of death: ICD10      | I70.80 | Atherosclerosis d | 1 |
| Peripheral vascular disease | 40002 | Contributory (secondary) causes of death: ICD10 | I70.80 | Atherosclerosis d | 1 |
| Peripheral vascular disease | 41202 | Diagnoses - main ICD10                          | I70.9  | Generalised and   | 1 |
| Peripheral vascular disease | 41204 | Diagnoses - secondary ICD10                     | I70.9  | Generalised and   | 1 |
| Peripheral vascular disease | 40001 | Underlying (primary) cause of death: ICD10      | I70.9  | Generalised and   | 1 |
| Peripheral vascular disease | 40002 | Contributory (secondary) causes of death: ICD10 | I70.9  | Generalised and   | 1 |
| Peripheral vascular disease | 41202 | Diagnoses - main ICD10                          | I70.90 | Generalized and   | 1 |
| Peripheral vascular disease | 41204 | Diagnoses - secondary ICD10                     | I70.90 | Generalized and   | 1 |

|                             |       |                                                 |        |                   |   |
|-----------------------------|-------|-------------------------------------------------|--------|-------------------|---|
| Peripheral vascular disease | 40001 | Underlying (primary) cause of death: ICD10      | I70.90 | Generalized and   | 1 |
| Peripheral vascular disease | 40002 | Contributory (secondary) causes of death: ICD10 | I70.90 | Generalized and   | 1 |
| Peripheral vascular disease | 41202 | Diagnoses - main ICD10                          | I73.8  | Other specified p | 1 |
| Peripheral vascular disease | 41204 | Diagnoses - secondary ICD10                     | I73.8  | Other specified p | 1 |
| Peripheral vascular disease | 40001 | Underlying (primary) cause of death: ICD10      | I73.8  | Other specified p | 1 |
| Peripheral vascular disease | 40002 | Contributory (secondary) causes of death: ICD10 | I73.8  | Other specified p | 1 |
| Peripheral vascular disease | 41202 | Diagnoses - main ICD10                          | I73.9  | Peripheral vascu  | 1 |
| Peripheral vascular disease | 41204 | Diagnoses - secondary ICD10                     | I73.9  | Peripheral vascu  | 1 |
| Peripheral vascular disease | 40001 | Underlying (primary) cause of death: ICD10      | I73.9  | Peripheral vascu  | 1 |
| Peripheral vascular disease | 40002 | Contributory (secondary) causes of death: ICD10 | I73.9  | Peripheral vascu  | 1 |
| Peripheral vascular disease | 41203 | Diagnoses - main ICD9                           | 4400   | Atherosclerosis d | 1 |
| Peripheral vascular disease | 41205 | Diagnoses - secondary ICD9                      | 4400   | Atherosclerosis d | 1 |
| Peripheral vascular disease | 41203 | Diagnoses - main ICD9                           | 4402   | Atherosclerosis d | 1 |
| Peripheral vascular disease | 41205 | Diagnoses - secondary ICD9                      | 4402   | Atherosclerosis d | 1 |
| Peripheral vascular disease | 41203 | Diagnoses - main ICD9                           | 4438   | Other specified p | 1 |
| Peripheral vascular disease | 41205 | Diagnoses - secondary ICD9                      | 4438   | Other specified p | 1 |
| Peripheral vascular disease | 41203 | Diagnoses - main ICD9                           | 4439   | Peripheral vascu  | 1 |
| Peripheral vascular disease | 41205 | Diagnoses - secondary ICD9                      | 4439   | Peripheral vascu  | 1 |
| Peripheral vascular disease | 41200 | Operative procedures - main OPCS                | X09.3  | Amputation of le  | 1 |
| Peripheral vascular disease | 41210 | Operative procedures - secondary OPCS           | X09.3  | Amputation of le  | 1 |
| Peripheral vascular disease | 41200 | Operative procedures - main OPCS                | X09.4  | Amputation of le  | 1 |
| Peripheral vascular disease | 41210 | Operative procedures - secondary OPCS           | X09.4  | Amputation of le  | 1 |

|                             |       |                                       |       |                                       |   |
|-----------------------------|-------|---------------------------------------|-------|---------------------------------------|---|
| Peripheral vascular disease | 41200 | Operative procedures - main OPCS      | X09.5 | Amputation of leg                     | 1 |
| Peripheral vascular disease | 41210 | Operative procedures - secondary OPCS | X09.5 | Amputation of leg                     | 1 |
| Peripheral vascular disease | 41200 | Operative procedures - main OPCS      | L21.6 | Bypass of bifurcation                 | 1 |
| Peripheral vascular disease | 41210 | Operative procedures - secondary OPCS | L21.6 | Bypass of bifurcation                 | 1 |
| Peripheral vascular disease | 41200 | Operative procedures - main OPCS      | L51.3 | Bypass of artery                      | 1 |
| Peripheral vascular disease | 41210 | Operative procedures - secondary OPCS | L51.3 | Bypass of artery                      | 1 |
| Peripheral vascular disease | 41200 | Operative procedures - main OPCS      | L51.6 | Bypass of artery                      | 1 |
| Peripheral vascular disease | 41210 | Operative procedures - secondary OPCS | L51.6 | Bypass of artery                      | 1 |
| Peripheral vascular disease | 41200 | Operative procedures - main OPCS      | L51.8 | Other specified                       | 1 |
| Peripheral vascular disease | 41210 | Operative procedures - secondary OPCS | L51.8 | Other specified                       | 1 |
| Peripheral vascular disease | 41200 | Operative procedures - main OPCS      | L52.1 | Endarterectomy                        | 1 |
| Peripheral vascular disease | 41210 | Operative procedures - secondary OPCS | L52.1 | Endarterectomy                        | 1 |
| Peripheral vascular disease | 41200 | Operative procedures - main OPCS      | L52.2 | Endarterectomy                        | 1 |
| Peripheral vascular disease | 41210 | Operative procedures - secondary OPCS | L52.2 | Endarterectomy                        | 1 |
| Peripheral vascular disease | 41200 | Operative procedures - main OPCS      | L54.1 | Percutaneous transluminal angioplasty | 1 |
| Peripheral vascular disease | 41210 | Operative procedures - secondary OPCS | L54.1 | Percutaneous transluminal angioplasty | 1 |
| Peripheral vascular disease | 41200 | Operative procedures - main OPCS      | L54.4 | Percutaneous transluminal angioplasty | 1 |
| Peripheral vascular disease | 41210 | Operative procedures - secondary OPCS | L54.4 | Percutaneous transluminal angioplasty | 1 |
| Peripheral vascular disease | 41200 | Operative procedures - main OPCS      | L54.8 | Other specified                       | 1 |
| Peripheral vascular disease | 41210 | Operative procedures - secondary OPCS | L54.8 | Other specified                       | 1 |
| Peripheral vascular disease | 41200 | Operative procedures - main OPCS      | L59.1 | Bypass of femoral artery              | 1 |
| Peripheral vascular disease | 41210 | Operative procedures - secondary OPCS | L59.1 | Bypass of femoral artery              | 1 |
| Peripheral vascular disease | 41200 | Operative procedures - main OPCS      | L59.2 | Bypass of femoral artery              | 1 |
| Peripheral vascular disease | 41210 | Operative procedures - secondary OPCS | L59.2 | Bypass of femoral artery              | 1 |
| Peripheral vascular disease | 41200 | Operative procedures - main OPCS      | L59.3 | Bypass of femoral artery              | 1 |
| Peripheral vascular disease | 41210 | Operative procedures - secondary OPCS | L59.3 | Bypass of femoral artery              | 1 |

|                             |       |                                             |       |                   |   |
|-----------------------------|-------|---------------------------------------------|-------|-------------------|---|
| Peripheral vascular disease | 41200 | Operative procedures - main OPCS            | L59.4 | Bypass of femor   | 1 |
| Peripheral vascular disease | 41210 | Operative procedures - secondary OPCS       | L59.4 | Bypass of femor   | 1 |
| Peripheral vascular disease | 41200 | Operative procedures - main OPCS            | L59.5 | Bypass of femor   | 1 |
| Peripheral vascular disease | 41210 | Operative procedures - secondary OPCS       | L59.5 | Bypass of femor   | 1 |
| Peripheral vascular disease | 41200 | Operative procedures - main OPCS            | L59.6 | Bypass of femor   | 1 |
| Peripheral vascular disease | 41210 | Operative procedures - secondary OPCS       | L59.6 | Bypass of femor   | 1 |
| Peripheral vascular disease | 41200 | Operative procedures - main OPCS            | L59.7 | Bypass of femor   | 1 |
| Peripheral vascular disease | 41210 | Operative procedures - secondary OPCS       | L59.7 | Bypass of femor   | 1 |
| Peripheral vascular disease | 41200 | Operative procedures - main OPCS            | L59.8 | Other specified c | 1 |
| Peripheral vascular disease | 41210 | Operative procedures - secondary OPCS       | L59.8 | Other specified c | 1 |
| Peripheral vascular disease | 41200 | Operative procedures - main OPCS            | L60.1 | Endarterectomy    | 1 |
| Peripheral vascular disease | 41210 | Operative procedures - secondary OPCS       | L60.1 | Endarterectomy    | 1 |
| Peripheral vascular disease | 41200 | Operative procedures - main OPCS            | L60.2 | Endarterectomy    | 1 |
| Peripheral vascular disease | 41210 | Operative procedures - secondary OPCS       | L60.2 | Endarterectomy    | 1 |
| Peripheral vascular disease | 41200 | Operative procedures - main OPCS            | L63.1 | Percutaneous tra  | 1 |
| Peripheral vascular disease | 41210 | Operative procedures - secondary OPCS       | L63.1 | Percutaneous tra  | 1 |
| Peripheral vascular disease | 41200 | Operative procedures - main OPCS            | L63.5 | Percutaneous tra  | 1 |
| Peripheral vascular disease | 41210 | Operative procedures - secondary OPCS       | L63.5 | Percutaneous tra  | 1 |
| Peripheral vascular disease | 41200 | Operative procedures - main OPCS            | L63.9 | Unspecified tran  | 1 |
| Peripheral vascular disease | 41210 | Operative procedures - secondary OPCS       | L63.9 | Unspecified tran  | 1 |
| Peripheral vascular disease | 41200 | Operative procedures - main OPCS            | L66.7 | Percutaneous tra  | 1 |
| Peripheral vascular disease | 41210 | Operative procedures - secondary OPCS       | L66.7 | Percutaneous tra  | 1 |
| Hypertension                | 20002 | Non-cancer illness code, self-reported      | 1065  | Hypertension      | 1 |
| Hypertension                | 20002 | Non-cancer illness code, self-reported      | 1072  | Essential hypert  | 1 |
| Hypertension                | 6150  | Vascular/heart problems diagnosed by doctor | 4     | High blood press  | 1 |



|              |       |                                                 |       |                  |   |
|--------------|-------|-------------------------------------------------|-------|------------------|---|
| Hypertension | 41202 | Diagnoses - main ICD10                          | I10   | Essential (prima | 1 |
| Hypertension | 41204 | Diagnoses - secondary ICD10                     | I10   | Essential (prima | 1 |
| Hypertension | 40001 | Underlying (primary) cause of death: ICD10      | I10   | Essential (prima | 1 |
| Hypertension | 40002 | Contributory (secondary) causes of death: ICD10 | I10   | Essential (prima | 1 |
| Hypertension | 41202 | Diagnoses - main ICD10                          | I11   | Hypertensive he  | 1 |
| Hypertension | 41204 | Diagnoses - secondary ICD10                     | I11   | Hypertensive he  | 1 |
| Hypertension | 40001 | Underlying (primary) cause of death: ICD10      | I11   | Hypertensive he  | 1 |
| Hypertension | 40002 | Contributory (secondary) causes of death: ICD10 | I11   | Hypertensive he  | 1 |
| Hypertension | 41202 | Diagnoses - main ICD10                          | I11.0 | Hypertensive he  | 1 |
| Hypertension | 41204 | Diagnoses - secondary ICD10                     | I11.0 | Hypertensive he  | 1 |
| Hypertension | 40001 | Underlying (primary) cause of death: ICD10      | I11.0 | Hypertensive he  | 1 |
| Hypertension | 40002 | Contributory (secondary) causes of death: ICD10 | I11.0 | Hypertensive he  | 1 |
| Hypertension | 41202 | Diagnoses - main ICD10                          | I11.9 | Hypertensive he  | 1 |
| Hypertension | 41204 | Diagnoses - secondary ICD10                     | I11.9 | Hypertensive he  | 1 |
| Hypertension | 40001 | Underlying (primary) cause of death: ICD10      | I11.9 | Hypertensive he  | 1 |
| Hypertension | 40002 | Contributory (secondary) causes of death: ICD10 | I11.9 | Hypertensive he  | 1 |
| Hypertension | 41202 | Diagnoses - main ICD10                          | I12   | Hypertensive ren | 1 |
| Hypertension | 41204 | Diagnoses - secondary ICD10                     | I12   | Hypertensive ren | 1 |
| Hypertension | 40001 | Underlying (primary) cause of death: ICD10      | I12   | Hypertensive ren | 1 |
| Hypertension | 40002 | Contributory (secondary) causes of death: ICD10 | I12   | Hypertensive ren | 1 |

|              |       |                                                 |       |                  |   |
|--------------|-------|-------------------------------------------------|-------|------------------|---|
| Hypertension | 41202 | Diagnoses - main ICD10                          | I12.0 | Hypertensive ren | 1 |
| Hypertension | 41204 | Diagnoses - secondary ICD10                     | I12.0 | Hypertensive ren | 1 |
| Hypertension | 40001 | Underlying (primary) cause of death: ICD10      | I12.0 | Hypertensive ren | 1 |
| Hypertension | 40002 | Contributory (secondary) causes of death: ICD10 | I12.0 | Hypertensive ren | 1 |
| Hypertension | 41202 | Diagnoses - main ICD10                          | I12.9 | Hypertensive ren | 1 |
| Hypertension | 41204 | Diagnoses - secondary ICD10                     | I12.9 | Hypertensive ren | 1 |
| Hypertension | 40001 | Underlying (primary) cause of death: ICD10      | I12.9 | Hypertensive ren | 1 |
| Hypertension | 40002 | Contributory (secondary) causes of death: ICD10 | I12.9 | Hypertensive ren | 1 |
| Hypertension | 41202 | Diagnoses - main ICD10                          | I13   | Hypertensive he  | 1 |
| Hypertension | 41204 | Diagnoses - secondary ICD10                     | I13   | Hypertensive he  | 1 |
| Hypertension | 40001 | Underlying (primary) cause of death: ICD10      | I13   | Hypertensive he  | 1 |
| Hypertension | 40002 | Contributory (secondary) causes of death: ICD10 | I13   | Hypertensive he  | 1 |
| Hypertension | 41202 | Diagnoses - main ICD10                          | I13.0 | Hypertensive he  | 1 |
| Hypertension | 41204 | Diagnoses - secondary ICD10                     | I13.0 | Hypertensive he  | 1 |
| Hypertension | 40001 | Underlying (primary) cause of death: ICD10      | I13.0 | Hypertensive he  | 1 |
| Hypertension | 40002 | Contributory (secondary) causes of death: ICD10 | I13.0 | Hypertensive he  | 1 |
| Hypertension | 41202 | Diagnoses - main ICD10                          | I13.1 | Hypertensive he  | 1 |
| Hypertension | 41204 | Diagnoses - secondary ICD10                     | I13.1 | Hypertensive he  | 1 |
| Hypertension | 40001 | Underlying (primary) cause of death: ICD10      | I13.1 | Hypertensive he  | 1 |
| Hypertension | 40002 | Contributory (secondary) causes of death: ICD10 | I13.1 | Hypertensive he  | 1 |

|              |       |                                                 |       |                 |   |
|--------------|-------|-------------------------------------------------|-------|-----------------|---|
| Hypertension | 41202 | Diagnoses - main ICD10                          | I13.2 | Hypertensive he | 1 |
| Hypertension | 41204 | Diagnoses - secondary ICD10                     | I13.2 | Hypertensive he | 1 |
| Hypertension | 40001 | Underlying (primary) cause of death: ICD10      | I13.2 | Hypertensive he | 1 |
| Hypertension | 40002 | Contributory (secondary) causes of death: ICD10 | I13.2 | Hypertensive he | 1 |
| Hypertension | 41202 | Diagnoses - main ICD10                          | I13.9 | Hypertensive he | 1 |
| Hypertension | 41204 | Diagnoses - secondary ICD10                     | I13.9 | Hypertensive he | 1 |
| Hypertension | 40001 | Underlying (primary) cause of death: ICD10      | I13.9 | Hypertensive he | 1 |
| Hypertension | 40002 | Contributory (secondary) causes of death: ICD10 | I13.9 | Hypertensive he | 1 |
| Hypertension | 41202 | Diagnoses - main ICD10                          | I15   | Secondary hype  | 1 |
| Hypertension | 41204 | Diagnoses - secondary ICD10                     | I15   | Secondary hype  | 1 |
| Hypertension | 40001 | Underlying (primary) cause of death: ICD10      | I15   | Secondary hype  | 1 |
| Hypertension | 40002 | Contributory (secondary) causes of death: ICD10 | I15   | Secondary hype  | 1 |
| Hypertension | 41202 | Diagnoses - main ICD10                          | I15.0 | Renovascular hy | 1 |
| Hypertension | 41204 | Diagnoses - secondary ICD10                     | I15.0 | Renovascular hy | 1 |
| Hypertension | 40001 | Underlying (primary) cause of death: ICD10      | I15.0 | Renovascular hy | 1 |
| Hypertension | 40002 | Contributory (secondary) causes of death: ICD10 | I15.0 | Renovascular hy | 1 |
| Hypertension | 41202 | Diagnoses - main ICD10                          | I15.1 | Hypertension se | 1 |
| Hypertension | 41204 | Diagnoses - secondary ICD10                     | I15.1 | Hypertension se | 1 |
| Hypertension | 40001 | Underlying (primary) cause of death: ICD10      | I15.1 | Hypertension se | 1 |
| Hypertension | 40002 | Contributory (secondary) causes of death: ICD10 | I15.1 | Hypertension se | 1 |

|              |       |                                                 |       |                  |   |
|--------------|-------|-------------------------------------------------|-------|------------------|---|
| Hypertension | 41202 | Diagnoses - main ICD10                          | I15.2 | Hypertension se  | 1 |
| Hypertension | 41204 | Diagnoses - secondary ICD10                     | I15.2 | Hypertension se  | 1 |
| Hypertension | 40001 | Underlying (primary) cause of death: ICD10      | I15.2 | Hypertension se  | 1 |
| Hypertension | 40002 | Contributory (secondary) causes of death: ICD10 | I15.2 | Hypertension se  | 1 |
| Hypertension | 41202 | Diagnoses - main ICD10                          | I15.8 | Other secondary  | 1 |
| Hypertension | 41204 | Diagnoses - secondary ICD10                     | I15.8 | Other secondary  | 1 |
| Hypertension | 40001 | Underlying (primary) cause of death: ICD10      | I15.8 | Other secondary  | 1 |
| Hypertension | 40002 | Contributory (secondary) causes of death: ICD10 | I15.8 | Other secondary  | 1 |
| Hypertension | 41202 | Diagnoses - main ICD10                          | I15.9 | Secondary hype   | 1 |
| Hypertension | 41204 | Diagnoses - secondary ICD10                     | I15.9 | Secondary hype   | 1 |
| Hypertension | 40001 | Underlying (primary) cause of death: ICD10      | I15.9 | Secondary hype   | 1 |
| Hypertension | 40002 | Contributory (secondary) causes of death: ICD10 | I15.9 | Secondary hype   | 1 |
| Hypertension | 41203 | Diagnoses - main ICD9                           | 401   | Essential hypert | 1 |
| Hypertension | 41205 | Diagnoses - secondary ICD9                      | 401   | Essential hypert | 1 |
| Hypertension | 41203 | Diagnoses - main ICD9                           | 4010  | Essential hypert | 1 |
| Hypertension | 41205 | Diagnoses - secondary ICD9                      | 4010  | Essential hypert | 1 |
| Hypertension | 41203 | Diagnoses - main ICD9                           | 4011  | Essential hypert | 1 |
| Hypertension | 41205 | Diagnoses - secondary ICD9                      | 4011  | Essential hypert | 1 |
| Hypertension | 41203 | Diagnoses - main ICD9                           | 4019  | Essential hypert | 1 |
| Hypertension | 41205 | Diagnoses - secondary ICD9                      | 4019  | Essential hypert | 1 |
| Hypertension | 41203 | Diagnoses - main ICD9                           | 402   | Hypertensive he  | 1 |
| Hypertension | 41205 | Diagnoses - secondary ICD9                      | 402   | Hypertensive he  | 1 |

|              |       |                            |      |                  |   |
|--------------|-------|----------------------------|------|------------------|---|
| Hypertension | 41203 | Diagnoses - main ICD9      | 4020 | Hypertensive he  | 1 |
| Hypertension | 41205 | Diagnoses - secondary ICD9 | 4020 | Hypertensive he  | 1 |
| Hypertension | 41203 | Diagnoses - main ICD9      | 4021 | Hypertensive he  | 1 |
| Hypertension | 41205 | Diagnoses - secondary ICD9 | 4021 | Hypertensive he  | 1 |
| Hypertension | 41203 | Diagnoses - main ICD9      | 4029 | Hypertensive he  | 1 |
| Hypertension | 41205 | Diagnoses - secondary ICD9 | 4029 | Hypertensive he  | 1 |
| Hypertension | 41203 | Diagnoses - main ICD9      | 403  | Hypertensive ren | 1 |
| Hypertension | 41205 | Diagnoses - secondary ICD9 | 403  | Hypertensive ren | 1 |
| Hypertension | 41203 | Diagnoses - main ICD9      | 4030 | Hypertensive ren | 1 |
| Hypertension | 41205 | Diagnoses - secondary ICD9 | 4030 | Hypertensive ren | 1 |
| Hypertension | 41203 | Diagnoses - main ICD9      | 4031 | Hypertensive ren | 1 |
| Hypertension | 41205 | Diagnoses - secondary ICD9 | 4031 | Hypertensive ren | 1 |
| Hypertension | 41203 | Diagnoses - main ICD9      | 4039 | Hypertensive ren | 1 |
| Hypertension | 41205 | Diagnoses - secondary ICD9 | 4039 | Hypertensive ren | 1 |
| Hypertension | 41203 | Diagnoses - main ICD9      | 404  | Hypertensive he  | 1 |
| Hypertension | 41205 | Diagnoses - secondary ICD9 | 404  | Hypertensive he  | 1 |
| Hypertension | 41203 | Diagnoses - main ICD9      | 4040 | Hypertensive he  | 1 |
| Hypertension | 41205 | Diagnoses - secondary ICD9 | 4040 | Hypertensive he  | 1 |
| Hypertension | 41203 | Diagnoses - main ICD9      | 4041 | Hypertensive he  | 1 |
| Hypertension | 41205 | Diagnoses - secondary ICD9 | 4041 | Hypertensive he  | 1 |
| Hypertension | 41203 | Diagnoses - main ICD9      | 4049 | Hypertensive he  | 1 |
| Hypertension | 41205 | Diagnoses - secondary ICD9 | 4049 | Hypertensive he  | 1 |
| Hypertension | 41203 | Diagnoses - main ICD9      | 405  | Secondary hype   | 1 |
| Hypertension | 41205 | Diagnoses - secondary ICD9 | 405  | Secondary hype   | 1 |
| Hypertension | 41203 | Diagnoses - main ICD9      | 4050 | Secondary hype   | 1 |

|                      |       |                                                 |       |                   |   |
|----------------------|-------|-------------------------------------------------|-------|-------------------|---|
| Hypertension         | 41205 | Diagnoses - secondary ICD9                      | 4050  | Secondary hype    | 1 |
| Hypertension         | 41203 | Diagnoses - main ICD9                           | 4051  | Secondary hype    | 1 |
| Hypertension         | 41205 | Diagnoses - secondary ICD9                      | 4051  | Secondary hype    | 1 |
| Hypertension         | 41203 | Diagnoses - main ICD9                           | 4059  | Secondary hype    | 1 |
| Hypertension         | 41205 | Diagnoses - secondary ICD9                      | 4059  | Secondary hype    | 1 |
| Hypercholesterolemia | 20002 | Non-cancer illness code, self-reported          | 1473  | High cholesterol  | 1 |
| Hypercholesterolemia | 41202 | Diagnoses - main ICD10                          | E78.0 | Pure hyperchole   | 1 |
| Hypercholesterolemia | 41204 | Diagnoses - secondary ICD10                     | E78.0 | Pure hyperchole   | 1 |
| Hypercholesterolemia | 40001 | Underlying (primary) cause of death: ICD10      | E78.0 | Pure hyperchole   | 1 |
| Hypercholesterolemia | 40002 | Contributory (secondary) causes of death: ICD10 | E78.0 | Pure hyperchole   | 1 |
| Hypercholesterolemia | 41202 | Diagnoses - main ICD10                          | E78.1 | Pure hyperglyce   | 1 |
| Hypercholesterolemia | 41204 | Diagnoses - secondary ICD10                     | E78.1 | Pure hyperglyce   | 1 |
| Hypercholesterolemia | 40001 | Underlying (primary) cause of death: ICD10      | E78.1 | Pure hyperglyce   | 1 |
| Hypercholesterolemia | 40002 | Contributory (secondary) causes of death: ICD10 | E78.1 | Pure hyperglyce   | 1 |
| Hypercholesterolemia | 41202 | Diagnoses - main ICD10                          | E78.2 | Mixed hyperlipida | 1 |
| Hypercholesterolemia | 41204 | Diagnoses - secondary ICD10                     | E78.2 | Mixed hyperlipida | 1 |
| Hypercholesterolemia | 40001 | Underlying (primary) cause of death: ICD10      | E78.2 | Mixed hyperlipida | 1 |
| Hypercholesterolemia | 40002 | Contributory (secondary) causes of death: ICD10 | E78.2 | Mixed hyperlipida | 1 |
| Hypercholesterolemia | 41202 | Diagnoses - main ICD10                          | E78.4 | Other hyperlipida | 1 |
| Hypercholesterolemia | 41204 | Diagnoses - secondary ICD10                     | E78.4 | Other hyperlipida | 1 |
| Hypercholesterolemia | 40001 | Underlying (primary) cause of death: ICD10      | E78.4 | Other hyperlipida | 1 |

|                      |       |                                                 |       |                       |   |
|----------------------|-------|-------------------------------------------------|-------|-----------------------|---|
| Hypercholesterolemia | 40002 | Contributory (secondary) causes of death: ICD10 | E78.4 | Other hyperlipidaemia | 1 |
| Hypercholesterolemia | 41202 | Diagnoses - main ICD10                          | E78.5 | Hyperlipidaemia,      | 1 |
| Hypercholesterolemia | 41204 | Diagnoses - secondary ICD10                     | E78.5 | Hyperlipidaemia,      | 1 |
| Hypercholesterolemia | 40001 | Underlying (primary) cause of death: ICD10      | E78.5 | Hyperlipidaemia,      | 1 |
| Hypercholesterolemia | 40002 | Contributory (secondary) causes of death: ICD10 | E78.5 | Hyperlipidaemia,      | 1 |
| Aortic valve disease | 20002 | Non-cancer illness code, self-reported          | 1490  | Aortic stenosis       | 1 |
| Aortic valve disease | 20002 | Non-cancer illness code, self-reported          | 1586  | Aortic valve dise     | 1 |
| Aortic valve disease | 20002 | Non-cancer illness code, self-reported          | 1587  | Aortic regurgitati    | 1 |
| Aortic valve disease | 20004 | Operation code, self-reported                   | 1099  | Aortic valve repa     | 1 |
| Aortic valve disease | 41202 | Diagnoses - main ICD10                          | I06   | Rheumatic aortic      | 1 |
| Aortic valve disease | 41204 | Diagnoses - secondary ICD10                     | I06   | Rheumatic aortic      | 1 |
| Aortic valve disease | 40001 | Underlying (primary) cause of death: ICD10      | I06   | Rheumatic aortic      | 1 |
| Aortic valve disease | 40002 | Contributory (secondary) causes of death: ICD10 | I06   | Rheumatic aortic      | 1 |
| Aortic valve disease | 41202 | Diagnoses - main ICD10                          | I06.0 | Rheumatic aortic      | 1 |
| Aortic valve disease | 41204 | Diagnoses - secondary ICD10                     | I06.0 | Rheumatic aortic      | 1 |
| Aortic valve disease | 40001 | Underlying (primary) cause of death: ICD10      | I06.0 | Rheumatic aortic      | 1 |
| Aortic valve disease | 40002 | Contributory (secondary) causes of death: ICD10 | I06.0 | Rheumatic aortic      | 1 |
| Aortic valve disease | 41202 | Diagnoses - main ICD10                          | I06.1 | Rheumatic aortic      | 1 |
| Aortic valve disease | 41204 | Diagnoses - secondary ICD10                     | I06.1 | Rheumatic aortic      | 1 |
| Aortic valve disease | 40001 | Underlying (primary) cause of death: ICD10      | I06.1 | Rheumatic aortic      | 1 |

|                      |       |                                                 |       |                   |   |
|----------------------|-------|-------------------------------------------------|-------|-------------------|---|
| Aortic valve disease | 40002 | Contributory (secondary) causes of death: ICD10 | I06.1 | Rheumatic aortic  | 1 |
| Aortic valve disease | 41202 | Diagnoses - main ICD10                          | I06.2 | Rheumatic aortic  | 1 |
| Aortic valve disease | 41204 | Diagnoses - secondary ICD10                     | I06.2 | Rheumatic aortic  | 1 |
| Aortic valve disease | 40001 | Underlying (primary) cause of death: ICD10      | I06.2 | Rheumatic aortic  | 1 |
| Aortic valve disease | 40002 | Contributory (secondary) causes of death: ICD10 | I06.2 | Rheumatic aortic  | 1 |
| Aortic valve disease | 41202 | Diagnoses - main ICD10                          | I06.8 | Other rheumatic   | 1 |
| Aortic valve disease | 41204 | Diagnoses - secondary ICD10                     | I06.8 | Other rheumatic   | 1 |
| Aortic valve disease | 40001 | Underlying (primary) cause of death: ICD10      | I06.8 | Other rheumatic   | 1 |
| Aortic valve disease | 40002 | Contributory (secondary) causes of death: ICD10 | I06.8 | Other rheumatic   | 1 |
| Aortic valve disease | 41202 | Diagnoses - main ICD10                          | I06.9 | Rheumatic aortic  | 1 |
| Aortic valve disease | 41204 | Diagnoses - secondary ICD10                     | I06.9 | Rheumatic aortic  | 1 |
| Aortic valve disease | 40001 | Underlying (primary) cause of death: ICD10      | I06.9 | Rheumatic aortic  | 1 |
| Aortic valve disease | 40002 | Contributory (secondary) causes of death: ICD10 | I06.9 | Rheumatic aortic  | 1 |
| Aortic valve disease | 41202 | Diagnoses - main ICD10                          | I08.0 | Disorders of both | 1 |
| Aortic valve disease | 41204 | Diagnoses - secondary ICD10                     | I08.0 | Disorders of both | 1 |
| Aortic valve disease | 40001 | Underlying (primary) cause of death: ICD10      | I08.0 | Disorders of both | 1 |
| Aortic valve disease | 40002 | Contributory (secondary) causes of death: ICD10 | I08.0 | Disorders of both | 1 |
| Aortic valve disease | 41202 | Diagnoses - main ICD10                          | I08.2 | Disorders of both | 1 |
| Aortic valve disease | 41204 | Diagnoses - secondary ICD10                     | I08.2 | Disorders of both | 1 |
| Aortic valve disease | 40001 | Underlying (primary) cause of death: ICD10      | I08.2 | Disorders of both | 1 |



|                      |       |                                                 |       |                              |   |
|----------------------|-------|-------------------------------------------------|-------|------------------------------|---|
| Aortic valve disease | 40002 | Contributory (secondary) causes of death: ICD10 | I08.2 | Disorders of both            | 1 |
| Aortic valve disease | 41202 | Diagnoses - main ICD10                          | I08.3 | Combined disorder            | 1 |
| Aortic valve disease | 41204 | Diagnoses - secondary ICD10                     | I08.3 | Combined disorder            | 1 |
| Aortic valve disease | 40001 | Underlying (primary) cause of death: ICD10      | I08.3 | Combined disorder            | 1 |
| Aortic valve disease | 40002 | Contributory (secondary) causes of death: ICD10 | I08.3 | Combined disorder            | 1 |
| Aortic valve disease | 41202 | Diagnoses - main ICD10                          | I35   | Nonrheumatic aortic          | 1 |
| Aortic valve disease | 41204 | Diagnoses - secondary ICD10                     | I35   | Nonrheumatic aortic          | 1 |
| Aortic valve disease | 40001 | Underlying (primary) cause of death: ICD10      | I35   | Nonrheumatic aortic          | 1 |
| Aortic valve disease | 40002 | Contributory (secondary) causes of death: ICD10 | I35   | Nonrheumatic aortic          | 1 |
| Aortic valve disease | 41202 | Diagnoses - main ICD10                          | I35.0 | Aortic (valve) stenosis      | 1 |
| Aortic valve disease | 41204 | Diagnoses - secondary ICD10                     | I35.0 | Aortic (valve) stenosis      | 1 |
| Aortic valve disease | 40001 | Underlying (primary) cause of death: ICD10      | I35.0 | Aortic (valve) stenosis      | 1 |
| Aortic valve disease | 40002 | Contributory (secondary) causes of death: ICD10 | I35.0 | Aortic (valve) stenosis      | 1 |
| Aortic valve disease | 41202 | Diagnoses - main ICD10                          | I35.1 | Aortic (valve) insufficiency | 1 |
| Aortic valve disease | 41204 | Diagnoses - secondary ICD10                     | I35.1 | Aortic (valve) insufficiency | 1 |
| Aortic valve disease | 40001 | Underlying (primary) cause of death: ICD10      | I35.1 | Aortic (valve) insufficiency | 1 |
| Aortic valve disease | 40002 | Contributory (secondary) causes of death: ICD10 | I35.1 | Aortic (valve) insufficiency | 1 |
| Aortic valve disease | 41202 | Diagnoses - main ICD10                          | I35.2 | Aortic (valve) stenosis      | 1 |
| Aortic valve disease | 41204 | Diagnoses - secondary ICD10                     | I35.2 | Aortic (valve) stenosis      | 1 |
| Aortic valve disease | 40001 | Underlying (primary) cause of death: ICD10      | I35.2 | Aortic (valve) stenosis      | 1 |

|                      |       |                                                 |       |                                            |   |
|----------------------|-------|-------------------------------------------------|-------|--------------------------------------------|---|
| Aortic valve disease | 40002 | Contributory (secondary) causes of death: ICD10 | I35.2 | Aortic (valve) stenosis                    | 1 |
| Aortic valve disease | 41202 | Diagnoses - main ICD10                          | I35.8 | Other aortic valve disease                 | 1 |
| Aortic valve disease | 41204 | Diagnoses - secondary ICD10                     | I35.8 | Other aortic valve disease                 | 1 |
| Aortic valve disease | 40001 | Underlying (primary) cause of death: ICD10      | I35.8 | Other aortic valve disease                 | 1 |
| Aortic valve disease | 40002 | Contributory (secondary) causes of death: ICD10 | I35.8 | Other aortic valve disease                 | 1 |
| Aortic valve disease | 41202 | Diagnoses - main ICD10                          | I35.9 | Aortic valve disease                       | 1 |
| Aortic valve disease | 41204 | Diagnoses - secondary ICD10                     | I35.9 | Aortic valve disease                       | 1 |
| Aortic valve disease | 40001 | Underlying (primary) cause of death: ICD10      | I35.9 | Aortic valve disease                       | 1 |
| Aortic valve disease | 40002 | Contributory (secondary) causes of death: ICD10 | I35.9 | Aortic valve disease                       | 1 |
| Aortic valve disease | 41202 | Diagnoses - main ICD10                          | I39.1 | Aortic valve disease                       | 1 |
| Aortic valve disease | 41204 | Diagnoses - secondary ICD10                     | I39.1 | Aortic valve disease                       | 1 |
| Aortic valve disease | 40001 | Underlying (primary) cause of death: ICD10      | I39.1 | Aortic valve disease                       | 1 |
| Aortic valve disease | 40002 | Contributory (secondary) causes of death: ICD10 | I39.1 | Aortic valve disease                       | 1 |
| Aortic valve disease | 41203 | Diagnoses - main ICD9                           | 3951  | Rheumatic aortic valve disease             | 1 |
| Aortic valve disease | 41205 | Diagnoses - secondary ICD9                      | 3951  | Rheumatic aortic valve disease             | 1 |
| Aortic valve disease | 41203 | Diagnoses - main ICD9                           | 3959  | Other and unspecified aortic valve disease | 1 |
| Aortic valve disease | 41205 | Diagnoses - secondary ICD9                      | 3959  | Other and unspecified aortic valve disease | 1 |
| Aortic valve disease | 41203 | Diagnoses - main ICD9                           | 4241  | Aortic valve disease                       | 1 |
| Aortic valve disease | 41205 | Diagnoses - secondary ICD9                      | 4241  | Aortic valve disease                       | 1 |
| Aortic valve disease | 41200 | Operative procedures - main OPCS                | K26   | Plastic repair of aortic valve             | 1 |
| Aortic valve disease | 41210 | Operative procedures - secondary OPCS           | K26   | Plastic repair of aortic valve             | 1 |
| Aortic valve disease | 41200 | Operative procedures - main OPCS                | K26.1 | Allograft replacement of aortic valve      | 1 |

|                      |       |                                                                                  |       |                   |   |
|----------------------|-------|----------------------------------------------------------------------------------|-------|-------------------|---|
| Aortic valve disease | 41210 | Operative procedures - secondary OPCS                                            | K26.1 | Allograft replace | 1 |
| Aortic valve disease | 41200 | Operative procedures - main OPCS                                                 | K26.2 | Xenograft replac  | 1 |
| Aortic valve disease | 41210 | Operative procedures - secondary OPCS                                            | K26.2 | Xenograft replac  | 1 |
| Aortic valve disease | 41200 | Operative procedures - main OPCS                                                 | K26.3 | Prosthetic replac | 1 |
| Aortic valve disease | 41210 | Operative procedures - secondary OPCS                                            | K26.3 | Prosthetic replac | 1 |
| Aortic valve disease | 41200 | Operative procedures - main OPCS                                                 | K26.4 | Replacement of    | 1 |
| Aortic valve disease | 41210 | Operative procedures - secondary OPCS                                            | K26.4 | Replacement of    | 1 |
| Aortic valve disease | 41200 | Operative procedures - main OPCS                                                 | K26.5 | Aortic valve repa | 1 |
| Aortic valve disease | 41210 | Operative procedures - secondary OPCS                                            | K26.5 | Aortic valve repa | 1 |
| Aortic valve disease | 41200 | Operative procedures - main OPCS                                                 | K26.8 | Other specified p | 1 |
| Aortic valve disease | 41210 | Operative procedures - secondary OPCS                                            | K26.8 | Other specified p | 1 |
| Aortic valve disease | 41200 | Operative procedures - main OPCS                                                 | K26.9 | Unspecified plas  | 1 |
| Aortic valve disease | 41210 | Operative procedures - secondary OPCS                                            | K26.9 | Unspecified plas  | 1 |
| Aortic valve disease | 41200 | Operative procedures - main OPCS                                                 | K30.2 | Revision of plast | 1 |
| Aortic valve disease | 41210 | Operative procedures - secondary OPCS                                            | K30.2 | Revision of plast | 1 |
| Diabetes, All        | 2443  | Diabetes diagnosed by doctor                                                     | 1     | Yes               | 1 |
| Diabetes, All        | 20002 | Non-cancer illness code, self-reported                                           | 1220  | Diabetes          | 1 |
| Diabetes, All        | 20002 | Non-cancer illness code, self-reported                                           | 1221  | Gestational diab  | 1 |
| Diabetes, All        | 20002 | Non-cancer illness code, self-reported                                           | 1222  | Type 1 diabetes   | 1 |
| Diabetes, All        | 20002 | Non-cancer illness code, self-reported                                           | 1223  | Type 2 diabetes   | 1 |
| Diabetes, All        | 2986  | Insulin use within one year                                                      | 1     | Started insulin w | 1 |
| Diabetes, All        | 6177  | Medication for cholesterol, blood pressure or diabetes                           | 3     | Insulin           | 1 |
| Diabetes, All        | 6153  | Medication for cholesterol, blood pressure, diabetes, or take exogenous hormones | 3     | Insulin           | 1 |

|               |       |                                                 |       |                 |   |
|---------------|-------|-------------------------------------------------|-------|-----------------|---|
| Diabetes, All | 41202 | Diagnoses - main ICD10                          | E10   | Insulin-depende | 1 |
| Diabetes, All | 41204 | Diagnoses - secondary ICD10                     | E10   | Insulin-depende | 1 |
| Diabetes, All | 40001 | Underlying (primary) cause of death: ICD10      | E10   | Insulin-depende | 1 |
| Diabetes, All | 40002 | Contributory (secondary) causes of death: ICD10 | E10   | Insulin-depende | 1 |
| Diabetes, All | 41202 | Diagnoses - main ICD10                          | E10.0 | Insulin-depende | 1 |
| Diabetes, All | 41204 | Diagnoses - secondary ICD10                     | E10.0 | Insulin-depende | 1 |
| Diabetes, All | 40001 | Underlying (primary) cause of death: ICD10      | E10.0 | Insulin-depende | 1 |
| Diabetes, All | 40002 | Contributory (secondary) causes of death: ICD10 | E10.0 | Insulin-depende | 1 |
| Diabetes, All | 41202 | Diagnoses - main ICD10                          | E10.1 | Insulin-depende | 1 |
| Diabetes, All | 41204 | Diagnoses - secondary ICD10                     | E10.1 | Insulin-depende | 1 |
| Diabetes, All | 40001 | Underlying (primary) cause of death: ICD10      | E10.1 | Insulin-depende | 1 |
| Diabetes, All | 40002 | Contributory (secondary) causes of death: ICD10 | E10.1 | Insulin-depende | 1 |
| Diabetes, All | 41202 | Diagnoses - main ICD10                          | E10.2 | Insulin-depende | 1 |
| Diabetes, All | 41204 | Diagnoses - secondary ICD10                     | E10.2 | Insulin-depende | 1 |
| Diabetes, All | 40001 | Underlying (primary) cause of death: ICD10      | E10.2 | Insulin-depende | 1 |
| Diabetes, All | 40002 | Contributory (secondary) causes of death: ICD10 | E10.2 | Insulin-depende | 1 |
| Diabetes, All | 41202 | Diagnoses - main ICD10                          | E10.3 | Insulin-depende | 1 |
| Diabetes, All | 41204 | Diagnoses - secondary ICD10                     | E10.3 | Insulin-depende | 1 |
| Diabetes, All | 40001 | Underlying (primary) cause of death: ICD10      | E10.3 | Insulin-depende | 1 |
| Diabetes, All | 40002 | Contributory (secondary) causes of death: ICD10 | E10.3 | Insulin-depende | 1 |

|               |       |                                                 |       |                 |   |
|---------------|-------|-------------------------------------------------|-------|-----------------|---|
| Diabetes, All | 41202 | Diagnoses - main ICD10                          | E10.4 | Insulin-depende | 1 |
| Diabetes, All | 41204 | Diagnoses - secondary ICD10                     | E10.4 | Insulin-depende | 1 |
| Diabetes, All | 40001 | Underlying (primary) cause of death: ICD10      | E10.4 | Insulin-depende | 1 |
| Diabetes, All | 40002 | Contributory (secondary) causes of death: ICD10 | E10.4 | Insulin-depende | 1 |
| Diabetes, All | 41202 | Diagnoses - main ICD10                          | E10.5 | Insulin-depende | 1 |
| Diabetes, All | 41204 | Diagnoses - secondary ICD10                     | E10.5 | Insulin-depende | 1 |
| Diabetes, All | 40001 | Underlying (primary) cause of death: ICD10      | E10.5 | Insulin-depende | 1 |
| Diabetes, All | 40002 | Contributory (secondary) causes of death: ICD10 | E10.5 | Insulin-depende | 1 |
| Diabetes, All | 41202 | Diagnoses - main ICD10                          | E10.6 | Insulin-depende | 1 |
| Diabetes, All | 41204 | Diagnoses - secondary ICD10                     | E10.6 | Insulin-depende | 1 |
| Diabetes, All | 40001 | Underlying (primary) cause of death: ICD10      | E10.6 | Insulin-depende | 1 |
| Diabetes, All | 40002 | Contributory (secondary) causes of death: ICD10 | E10.6 | Insulin-depende | 1 |
| Diabetes, All | 41202 | Diagnoses - main ICD10                          | E10.7 | Insulin-depende | 1 |
| Diabetes, All | 41204 | Diagnoses - secondary ICD10                     | E10.7 | Insulin-depende | 1 |
| Diabetes, All | 40001 | Underlying (primary) cause of death: ICD10      | E10.7 | Insulin-depende | 1 |
| Diabetes, All | 40002 | Contributory (secondary) causes of death: ICD10 | E10.7 | Insulin-depende | 1 |
| Diabetes, All | 41202 | Diagnoses - main ICD10                          | E10.8 | Insulin-depende | 1 |
| Diabetes, All | 41204 | Diagnoses - secondary ICD10                     | E10.8 | Insulin-depende | 1 |
| Diabetes, All | 40001 | Underlying (primary) cause of death: ICD10      | E10.8 | Insulin-depende | 1 |
| Diabetes, All | 40002 | Contributory (secondary) causes of death: ICD10 | E10.8 | Insulin-depende | 1 |

|               |       |                                                 |       |                  |   |
|---------------|-------|-------------------------------------------------|-------|------------------|---|
| Diabetes, All | 41202 | Diagnoses - main ICD10                          | E10.9 | Insulin-depende  | 1 |
| Diabetes, All | 41204 | Diagnoses - secondary ICD10                     | E10.9 | Insulin-depende  | 1 |
| Diabetes, All | 40001 | Underlying (primary) cause of death: ICD10      | E10.9 | Insulin-depende  | 1 |
| Diabetes, All | 40002 | Contributory (secondary) causes of death: ICD10 | E10.9 | Insulin-depende  | 1 |
| Diabetes, All | 41202 | Diagnoses - main ICD10                          | E11   | Non-insulin-depe | 1 |
| Diabetes, All | 41204 | Diagnoses - secondary ICD10                     | E11   | Non-insulin-depe | 1 |
| Diabetes, All | 40001 | Underlying (primary) cause of death: ICD10      | E11   | Non-insulin-depe | 1 |
| Diabetes, All | 40002 | Contributory (secondary) causes of death: ICD10 | E11   | Non-insulin-depe | 1 |
| Diabetes, All | 41202 | Diagnoses - main ICD10                          | E11.0 | Non-insulin-depe | 1 |
| Diabetes, All | 41204 | Diagnoses - secondary ICD10                     | E11.0 | Non-insulin-depe | 1 |
| Diabetes, All | 40001 | Underlying (primary) cause of death: ICD10      | E11.0 | Non-insulin-depe | 1 |
| Diabetes, All | 40002 | Contributory (secondary) causes of death: ICD10 | E11.0 | Non-insulin-depe | 1 |
| Diabetes, All | 41202 | Diagnoses - main ICD10                          | E11.1 | Non-insulin-depe | 1 |
| Diabetes, All | 41204 | Diagnoses - secondary ICD10                     | E11.1 | Non-insulin-depe | 1 |
| Diabetes, All | 40001 | Underlying (primary) cause of death: ICD10      | E11.1 | Non-insulin-depe | 1 |
| Diabetes, All | 40002 | Contributory (secondary) causes of death: ICD10 | E11.1 | Non-insulin-depe | 1 |
| Diabetes, All | 41202 | Diagnoses - main ICD10                          | E11.2 | Non-insulin-depe | 1 |
| Diabetes, All | 41204 | Diagnoses - secondary ICD10                     | E11.2 | Non-insulin-depe | 1 |
| Diabetes, All | 40001 | Underlying (primary) cause of death: ICD10      | E11.2 | Non-insulin-depe | 1 |
| Diabetes, All | 40002 | Contributory (secondary) causes of death: ICD10 | E11.2 | Non-insulin-depe | 1 |

|               |       |                                                 |       |                  |   |
|---------------|-------|-------------------------------------------------|-------|------------------|---|
| Diabetes, All | 41202 | Diagnoses - main ICD10                          | E11.3 | Non-insulin-depe | 1 |
| Diabetes, All | 41204 | Diagnoses - secondary ICD10                     | E11.3 | Non-insulin-depe | 1 |
| Diabetes, All | 40001 | Underlying (primary) cause of death: ICD10      | E11.3 | Non-insulin-depe | 1 |
| Diabetes, All | 40002 | Contributory (secondary) causes of death: ICD10 | E11.3 | Non-insulin-depe | 1 |
| Diabetes, All | 41202 | Diagnoses - main ICD10                          | E11.4 | Non-insulin-depe | 1 |
| Diabetes, All | 41204 | Diagnoses - secondary ICD10                     | E11.4 | Non-insulin-depe | 1 |
| Diabetes, All | 40001 | Underlying (primary) cause of death: ICD10      | E11.4 | Non-insulin-depe | 1 |
| Diabetes, All | 40002 | Contributory (secondary) causes of death: ICD10 | E11.4 | Non-insulin-depe | 1 |
| Diabetes, All | 41202 | Diagnoses - main ICD10                          | E11.5 | Non-insulin-depe | 1 |
| Diabetes, All | 41204 | Diagnoses - secondary ICD10                     | E11.5 | Non-insulin-depe | 1 |
| Diabetes, All | 40001 | Underlying (primary) cause of death: ICD10      | E11.5 | Non-insulin-depe | 1 |
| Diabetes, All | 40002 | Contributory (secondary) causes of death: ICD10 | E11.5 | Non-insulin-depe | 1 |
| Diabetes, All | 41202 | Diagnoses - main ICD10                          | E11.6 | Non-insulin-depe | 1 |
| Diabetes, All | 41204 | Diagnoses - secondary ICD10                     | E11.6 | Non-insulin-depe | 1 |
| Diabetes, All | 40001 | Underlying (primary) cause of death: ICD10      | E11.6 | Non-insulin-depe | 1 |
| Diabetes, All | 40002 | Contributory (secondary) causes of death: ICD10 | E11.6 | Non-insulin-depe | 1 |
| Diabetes, All | 41202 | Diagnoses - main ICD10                          | E11.7 | Non-insulin-depe | 1 |
| Diabetes, All | 41204 | Diagnoses - secondary ICD10                     | E11.7 | Non-insulin-depe | 1 |
| Diabetes, All | 40001 | Underlying (primary) cause of death: ICD10      | E11.7 | Non-insulin-depe | 1 |
| Diabetes, All | 40002 | Contributory (secondary) causes of death: ICD10 | E11.7 | Non-insulin-depe | 1 |

|               |       |                                                 |       |                    |   |
|---------------|-------|-------------------------------------------------|-------|--------------------|---|
| Diabetes, All | 41202 | Diagnoses - main ICD10                          | E11.8 | Non-insulin-depe   | 1 |
| Diabetes, All | 41204 | Diagnoses - secondary ICD10                     | E11.8 | Non-insulin-depe   | 1 |
| Diabetes, All | 40001 | Underlying (primary) cause of death: ICD10      | E11.8 | Non-insulin-depe   | 1 |
| Diabetes, All | 40002 | Contributory (secondary) causes of death: ICD10 | E11.8 | Non-insulin-depe   | 1 |
| Diabetes, All | 41202 | Diagnoses - main ICD10                          | E11.9 | Non-insulin-depe   | 1 |
| Diabetes, All | 41204 | Diagnoses - secondary ICD10                     | E11.9 | Non-insulin-depe   | 1 |
| Diabetes, All | 40001 | Underlying (primary) cause of death: ICD10      | E11.9 | Non-insulin-depe   | 1 |
| Diabetes, All | 40002 | Contributory (secondary) causes of death: ICD10 | E11.9 | Non-insulin-depe   | 1 |
| Diabetes, All | 41202 | Diagnoses - main ICD10                          | E12   | Malnutrition-relat | 1 |
| Diabetes, All | 41204 | Diagnoses - secondary ICD10                     | E12   | Malnutrition-relat | 1 |
| Diabetes, All | 40001 | Underlying (primary) cause of death: ICD10      | E12   | Malnutrition-relat | 1 |
| Diabetes, All | 40002 | Contributory (secondary) causes of death: ICD10 | E12   | Malnutrition-relat | 1 |
| Diabetes, All | 41202 | Diagnoses - main ICD10                          | E12.1 | Malnutrition-relat | 1 |
| Diabetes, All | 41204 | Diagnoses - secondary ICD10                     | E12.1 | Malnutrition-relat | 1 |
| Diabetes, All | 40001 | Underlying (primary) cause of death: ICD10      | E12.1 | Malnutrition-relat | 1 |
| Diabetes, All | 40002 | Contributory (secondary) causes of death: ICD10 | E12.1 | Malnutrition-relat | 1 |
| Diabetes, All | 41202 | Diagnoses - main ICD10                          | E12.8 | Malnutrition-relat | 1 |
| Diabetes, All | 41204 | Diagnoses - secondary ICD10                     | E12.8 | Malnutrition-relat | 1 |
| Diabetes, All | 40001 | Underlying (primary) cause of death: ICD10      | E12.8 | Malnutrition-relat | 1 |
| Diabetes, All | 40002 | Contributory (secondary) causes of death: ICD10 | E12.8 | Malnutrition-relat | 1 |



|               |       |                                                 |       |                    |   |
|---------------|-------|-------------------------------------------------|-------|--------------------|---|
| Diabetes, All | 41202 | Diagnoses - main ICD10                          | E12.9 | Malnutrition-relat | 1 |
| Diabetes, All | 41204 | Diagnoses - secondary ICD10                     | E12.9 | Malnutrition-relat | 1 |
| Diabetes, All | 40001 | Underlying (primary) cause of death: ICD10      | E12.9 | Malnutrition-relat | 1 |
| Diabetes, All | 40002 | Contributory (secondary) causes of death: ICD10 | E12.9 | Malnutrition-relat | 1 |
| Diabetes, All | 41202 | Diagnoses - main ICD10                          | E13   | Other specified d  | 1 |
| Diabetes, All | 41204 | Diagnoses - secondary ICD10                     | E13   | Other specified d  | 1 |
| Diabetes, All | 40001 | Underlying (primary) cause of death: ICD10      | E13   | Other specified d  | 1 |
| Diabetes, All | 40002 | Contributory (secondary) causes of death: ICD10 | E13   | Other specified d  | 1 |
| Diabetes, All | 41202 | Diagnoses - main ICD10                          | E13.1 | Other specified d  | 1 |
| Diabetes, All | 41204 | Diagnoses - secondary ICD10                     | E13.1 | Other specified d  | 1 |
| Diabetes, All | 40001 | Underlying (primary) cause of death: ICD10      | E13.1 | Other specified d  | 1 |
| Diabetes, All | 40002 | Contributory (secondary) causes of death: ICD10 | E13.1 | Other specified d  | 1 |
| Diabetes, All | 41202 | Diagnoses - main ICD10                          | E13.2 | Other specified d  | 1 |
| Diabetes, All | 41204 | Diagnoses - secondary ICD10                     | E13.2 | Other specified d  | 1 |
| Diabetes, All | 40001 | Underlying (primary) cause of death: ICD10      | E13.2 | Other specified d  | 1 |
| Diabetes, All | 40002 | Contributory (secondary) causes of death: ICD10 | E13.2 | Other specified d  | 1 |
| Diabetes, All | 41202 | Diagnoses - main ICD10                          | E13.3 | Other specified d  | 1 |
| Diabetes, All | 41204 | Diagnoses - secondary ICD10                     | E13.3 | Other specified d  | 1 |
| Diabetes, All | 40001 | Underlying (primary) cause of death: ICD10      | E13.3 | Other specified d  | 1 |
| Diabetes, All | 40002 | Contributory (secondary) causes of death: ICD10 | E13.3 | Other specified d  | 1 |

|               |       |                                                 |       |                   |   |
|---------------|-------|-------------------------------------------------|-------|-------------------|---|
| Diabetes, All | 41202 | Diagnoses - main ICD10                          | E13.5 | Other specified d | 1 |
| Diabetes, All | 41204 | Diagnoses - secondary ICD10                     | E13.5 | Other specified d | 1 |
| Diabetes, All | 40001 | Underlying (primary) cause of death: ICD10      | E13.5 | Other specified d | 1 |
| Diabetes, All | 40002 | Contributory (secondary) causes of death: ICD10 | E13.5 | Other specified d | 1 |
| Diabetes, All | 41202 | Diagnoses - main ICD10                          | E13.6 | Other specified d | 1 |
| Diabetes, All | 41204 | Diagnoses - secondary ICD10                     | E13.6 | Other specified d | 1 |
| Diabetes, All | 40001 | Underlying (primary) cause of death: ICD10      | E13.6 | Other specified d | 1 |
| Diabetes, All | 40002 | Contributory (secondary) causes of death: ICD10 | E13.6 | Other specified d | 1 |
| Diabetes, All | 41202 | Diagnoses - main ICD10                          | E13.7 | Other specified d | 1 |
| Diabetes, All | 41204 | Diagnoses - secondary ICD10                     | E13.7 | Other specified d | 1 |
| Diabetes, All | 40001 | Underlying (primary) cause of death: ICD10      | E13.7 | Other specified d | 1 |
| Diabetes, All | 40002 | Contributory (secondary) causes of death: ICD10 | E13.7 | Other specified d | 1 |
| Diabetes, All | 41202 | Diagnoses - main ICD10                          | E13.8 | Other specified d | 1 |
| Diabetes, All | 41204 | Diagnoses - secondary ICD10                     | E13.8 | Other specified d | 1 |
| Diabetes, All | 40001 | Underlying (primary) cause of death: ICD10      | E13.8 | Other specified d | 1 |
| Diabetes, All | 40002 | Contributory (secondary) causes of death: ICD10 | E13.8 | Other specified d | 1 |
| Diabetes, All | 41202 | Diagnoses - main ICD10                          | E13.9 | Other specified d | 1 |
| Diabetes, All | 41204 | Diagnoses - secondary ICD10                     | E13.9 | Other specified d | 1 |
| Diabetes, All | 40001 | Underlying (primary) cause of death: ICD10      | E13.9 | Other specified d | 1 |
| Diabetes, All | 40002 | Contributory (secondary) causes of death: ICD10 | E13.9 | Other specified d | 1 |

|               |       |                                                 |       |                  |   |
|---------------|-------|-------------------------------------------------|-------|------------------|---|
| Diabetes, All | 41202 | Diagnoses - main ICD10                          | E14   | Unspecified diab | 1 |
| Diabetes, All | 41204 | Diagnoses - secondary ICD10                     | E14   | Unspecified diab | 1 |
| Diabetes, All | 40001 | Underlying (primary) cause of death: ICD10      | E14   | Unspecified diab | 1 |
| Diabetes, All | 40002 | Contributory (secondary) causes of death: ICD10 | E14   | Unspecified diab | 1 |
| Diabetes, All | 41202 | Diagnoses - main ICD10                          | E14.0 | Unspecified diab | 1 |
| Diabetes, All | 41204 | Diagnoses - secondary ICD10                     | E14.0 | Unspecified diab | 1 |
| Diabetes, All | 40001 | Underlying (primary) cause of death: ICD10      | E14.0 | Unspecified diab | 1 |
| Diabetes, All | 40002 | Contributory (secondary) causes of death: ICD10 | E14.0 | Unspecified diab | 1 |
| Diabetes, All | 41202 | Diagnoses - main ICD10                          | E14.1 | Unspecified diab | 1 |
| Diabetes, All | 41204 | Diagnoses - secondary ICD10                     | E14.1 | Unspecified diab | 1 |
| Diabetes, All | 40001 | Underlying (primary) cause of death: ICD10      | E14.1 | Unspecified diab | 1 |
| Diabetes, All | 40002 | Contributory (secondary) causes of death: ICD10 | E14.1 | Unspecified diab | 1 |
| Diabetes, All | 41202 | Diagnoses - main ICD10                          | E14.2 | Unspecified diab | 1 |
| Diabetes, All | 41204 | Diagnoses - secondary ICD10                     | E14.2 | Unspecified diab | 1 |
| Diabetes, All | 40001 | Underlying (primary) cause of death: ICD10      | E14.2 | Unspecified diab | 1 |
| Diabetes, All | 40002 | Contributory (secondary) causes of death: ICD10 | E14.2 | Unspecified diab | 1 |
| Diabetes, All | 41202 | Diagnoses - main ICD10                          | E14.3 | Unspecified diab | 1 |
| Diabetes, All | 41204 | Diagnoses - secondary ICD10                     | E14.3 | Unspecified diab | 1 |
| Diabetes, All | 40001 | Underlying (primary) cause of death: ICD10      | E14.3 | Unspecified diab | 1 |
| Diabetes, All | 40002 | Contributory (secondary) causes of death: ICD10 | E14.3 | Unspecified diab | 1 |

|               |       |                                                 |       |                  |   |
|---------------|-------|-------------------------------------------------|-------|------------------|---|
| Diabetes, All | 41202 | Diagnoses - main ICD10                          | E14.4 | Unspecified diab | 1 |
| Diabetes, All | 41204 | Diagnoses - secondary ICD10                     | E14.4 | Unspecified diab | 1 |
| Diabetes, All | 40001 | Underlying (primary) cause of death: ICD10      | E14.4 | Unspecified diab | 1 |
| Diabetes, All | 40002 | Contributory (secondary) causes of death: ICD10 | E14.4 | Unspecified diab | 1 |
| Diabetes, All | 41202 | Diagnoses - main ICD10                          | E14.5 | Unspecified diab | 1 |
| Diabetes, All | 41204 | Diagnoses - secondary ICD10                     | E14.5 | Unspecified diab | 1 |
| Diabetes, All | 40001 | Underlying (primary) cause of death: ICD10      | E14.5 | Unspecified diab | 1 |
| Diabetes, All | 40002 | Contributory (secondary) causes of death: ICD10 | E14.5 | Unspecified diab | 1 |
| Diabetes, All | 41202 | Diagnoses - main ICD10                          | E14.6 | Unspecified diab | 1 |
| Diabetes, All | 41204 | Diagnoses - secondary ICD10                     | E14.6 | Unspecified diab | 1 |
| Diabetes, All | 40001 | Underlying (primary) cause of death: ICD10      | E14.6 | Unspecified diab | 1 |
| Diabetes, All | 40002 | Contributory (secondary) causes of death: ICD10 | E14.6 | Unspecified diab | 1 |
| Diabetes, All | 41202 | Diagnoses - main ICD10                          | E14.7 | Unspecified diab | 1 |
| Diabetes, All | 41204 | Diagnoses - secondary ICD10                     | E14.7 | Unspecified diab | 1 |
| Diabetes, All | 40001 | Underlying (primary) cause of death: ICD10      | E14.7 | Unspecified diab | 1 |
| Diabetes, All | 40002 | Contributory (secondary) causes of death: ICD10 | E14.7 | Unspecified diab | 1 |
| Diabetes, All | 41202 | Diagnoses - main ICD10                          | E14.8 | Unspecified diab | 1 |
| Diabetes, All | 41204 | Diagnoses - secondary ICD10                     | E14.8 | Unspecified diab | 1 |
| Diabetes, All | 40001 | Underlying (primary) cause of death: ICD10      | E14.8 | Unspecified diab | 1 |
| Diabetes, All | 40002 | Contributory (secondary) causes of death: ICD10 | E14.8 | Unspecified diab | 1 |

|               |       |                                                 |       |                   |   |
|---------------|-------|-------------------------------------------------|-------|-------------------|---|
| Diabetes, All | 41202 | Diagnoses - main ICD10                          | E14.9 | Unspecified diab  | 1 |
| Diabetes, All | 41204 | Diagnoses - secondary ICD10                     | E14.9 | Unspecified diab  | 1 |
| Diabetes, All | 40001 | Underlying (primary) cause of death: ICD10      | E14.9 | Unspecified diab  | 1 |
| Diabetes, All | 40002 | Contributory (secondary) causes of death: ICD10 | E14.9 | Unspecified diab  | 1 |
| Diabetes, All | 41203 | Diagnosis - main ICD9                           | 2500  | Diabetes mellitus | 1 |
| Diabetes, All | 41205 | Diagnoses - secondary ICD9                      | 2500  | Diabetes mellitus | 1 |
| Diabetes, All | 41203 | Diagnosis - main ICD9                           | 25000 | Diabetes mellitus | 1 |
| Diabetes, All | 41205 | Diagnoses - secondary ICD9                      | 25000 | Diabetes mellitus | 1 |
| Diabetes, All | 41203 | Diagnosis - main ICD9                           | 25001 | Diabetes mellitus | 1 |
| Diabetes, All | 41205 | Diagnoses - secondary ICD9                      | 25001 | Diabetes mellitus | 1 |
| Diabetes, All | 41203 | Diagnosis - main ICD9                           | 25009 | Diabetes mellitus | 1 |
| Diabetes, All | 41205 | Diagnoses - secondary ICD9                      | 25009 | Diabetes mellitus | 1 |
| Diabetes, All | 41203 | Diagnosis - main ICD9                           | 2501  | Diabetes with ke  | 1 |
| Diabetes, All | 41205 | Diagnoses - secondary ICD9                      | 2501  | Diabetes with ke  | 1 |
| Diabetes, All | 41203 | Diagnosis - main ICD9                           | 25011 | Diabetes with ke  | 1 |
| Diabetes, All | 41205 | Diagnoses - secondary ICD9                      | 25011 | Diabetes with ke  | 1 |
| Diabetes, All | 41203 | Diagnosis - main ICD9                           | 25019 | Diabetes with ke  | 1 |
| Diabetes, All | 41205 | Diagnoses - secondary ICD9                      | 25019 | Diabetes with ke  | 1 |
| Diabetes, All | 41203 | Diagnosis - main ICD9                           | 2503  | Diabetes with re  | 1 |
| Diabetes, All | 41205 | Diagnoses - secondary ICD9                      | 2503  | Diabetes with re  | 1 |
| Diabetes, All | 41203 | Diagnosis - main ICD9                           | 2504  | Diabetes with op  | 1 |
| Diabetes, All | 41205 | Diagnoses - secondary ICD9                      | 2504  | Diabetes with op  | 1 |
| Diabetes, All | 41203 | Diagnosis - main ICD9                           | 2505  | Diabetes with ne  | 1 |
| Diabetes, All | 41205 | Diagnoses - secondary ICD9                      | 2505  | Diabetes with ne  | 1 |

|               |       |                               |       |                  |   |
|---------------|-------|-------------------------------|-------|------------------|---|
| Diabetes, All | 41203 | Diagnosis - main ICD9         | 25099 | Diabetes with un | 1 |
| Diabetes, All | 41205 | Diagnoses -<br>secondary ICD9 | 25099 | Diabetes with un | 1 |







































































































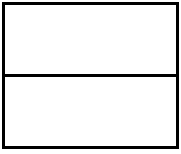

Supplement: NIHMS1525778-supplement-Major_Resource_Table.pdf [file NIHMS1525778-supplement-Major_Resource_Table.pdf]
