# Supplementary material
Source: PubMed Central journal article supplement (PMC6531323)
Supplement: NIHMS1525778-supplement-Supplemental_Material.pdf [file NIHMS1525778-supplement-Supplemental_Material.pdf]

**Supplementary Material**

**Genetic Association of Finger Photoplethysmography-Derived Arterial Stiffness Index with Blood Pressure and Coronary Artery Disease**

**S. M. Zekavat et al.**

## Supplementary Material Outline:

1. Supplementary Results
  - a. Interrogation of non-coding loci from the ASI genome-wide association analysis
  - b. Interrogation of coding loci from the ASI genome-wide association analysis
2. Supplementary Tables
  - a. Phenotype definitions and summary statistics
    - i. Supplementary Table I: Incident phenotype definitions
    - ii. Supplementary Table II: Sample filtration criteria
    - iii. Supplementary Table III: Summary statistics for the pulse wave analysis phenotypes in UK Biobank (N=131,686).
  - b. Epidemiological analyses with ASI
    - i. Supplementary Table IV: Univariate association of inverse-rank normalized stiffness index with clinical cardiovascular risk factors.
  - c. Genetic analyses with ASI
    - i. Supplementary Table V: Missense variants with moderate association with arterial stiffness ( $P < 1 \times 10^{-4}$ ).
    - ii. Supplementary Table VI: Genome-wide association results from the UK Biobank (N= 131,686) for the six independent instrumental variants with  $P < 5 \times 10^{-7}$  used for arterial stiffness index Mendelian randomization.
    - iii. Supplementary Table VII: Sensitivity analysis of the ASI GRS to evaluate associations with potential environmental confounders using univariate logistic regression.
    - iv. Supplementary Table VIII: Results from association of phenotypic and genotypic ASI in the UKBB with A) blood pressure adjusted for medications, and B) raw blood pressure.
    - v. Supplementary Table IX: Results from association of phenotypic and genotypic ASI in the UKBB with incident CAD using A) a more liberal phenotypic definition of CAD, and B) a more stringent phenotypic definition of CAD.
    - vi. Supplementary Table X: Association of each of the 6 ASI genetic risk score variants with incident CAD in the UKBB.
    - vii. Supplementary Table XI: 2-Sample Mendelian randomization with coronary artery disease.
    - viii. Supplementary Table XII: A list of known CAD variants and their discovery sources.
    - ix. Supplementary Table XIII: Comparing variant-level effects between ASI and CAD
    - x. Supplementary Table XIV: Evaluating the reverse association, of CAD influencing ASI, using 2-sample Mendelian randomization.
3. Supplementary Figures
  - a. Supplementary Figure I: Manhattan and quantile-quantile plot of genome-wide association statistics for arterial stiffness index.

- b. Supplementary Figure II: Chromatin contact points and aorta enhancers at top arterial stiffness index loci.
- c. Supplementary Figure III: Arterial stiffness genetic risk score histogram and association with arterial stiffness index phenotype.
- d. Supplementary Figure IV: Association of ASI genetic instruments, individually and combined, with prevalent CAD in 184,305 individuals (60,810 prevalent cases) from the CARDIOGRAMplusC4D cohort using 2-sample Mendelian Randomization.

## Supplementary Results

### Interrogation of non-coding loci from the ASI genome-wide association analysis

Since the lead variants occur within non-coding regions of the genome, we evaluated for evidence of chromatin conformational change to physically link variants with nearby coding regions. Further evaluation of chromatin contact and enhancers within human aorta primary tissues at these 5 loci was performed using the Hi-C Unifying Genomic Integrator(1) (**Supplementary Figure II**). Notably, the top variant region in the second *TEX41* intron most strongly contacts an aorta enhancer region at *ZEB2*, a gene which is also highly expressed in aorta(1). Additionally, the *COL4A2* intronic variant region physically interacts with *COL4A1* at an aorta enhancer, and both are expressed in aorta(1).

### Interrogation of coding loci from the ASI genome-wide association analysis

Of all variants with moderate significance ( $P < 1 \times 10^{-4}$ ), no predicted loss-of-function variants were identified; however, two missense variants predicted to be deleterious (via the MetaSVM *in silico* prediction score(2)) were identified. These predicted disruptive missense variants were within *HFE*, rs1800562 (+0.028 SD,  $P = 5.3 \times 10^{-5}$ , MAF=0.076), and within *NEFH*, rs149955255 (+0.135 SD,  $P = 5.9 \times 10^{-5}$ , MAF=0.0034) (**Supplementary Table VII**). Notably, polymorphisms in *HFE*, the gene implicated in hereditary hemochromatosis, are known to promote excessive iron accumulation, and have been associated with aortic stiffness(3) and endothelial dysfunction(4).

Supplementary Table I: Incident phenotype definitions

Please find details in the Major Resource Table.

Supplementary Table II: Sample filtration criteria

| <b>Criteria</b>                              | <b>N</b> |
|----------------------------------------------|----------|
| <b>Not White, British Ancestry</b>           |          |
| <b>Submitted Gender != Inferred Gender</b>   |          |
| <b>Putative Sex Chromosome Aneuploidy</b>    | 80,155   |
| <b>Het Missing Outliers</b>                  |          |
| <b>Non-Consented for Analysis</b>            |          |
| <b>≥ 2nd Degree Relatives</b>                | 36,158   |
| <b>Prevalent Peripheral Vascular Disease</b> | 3511     |
| <b>Prevalent Aortic Valve Disease</b>        | 1629     |
| <b>Prevalent Coronary Artery Disease</b>     | 15,386   |
| <b>Total Unique Samples Filtered</b>         | 127,043  |
| <b>Total Unique Samples Included</b>         | 375,586  |

Supplementary Table III: Summary statistics for the pulse wave analysis phenotypes in UK Biobank (N=131,686).

| <b>Pulse wave analysis phenotypes</b> | <b>Median</b> | <b>Q1</b> | <b>Q3</b> |
|---------------------------------------|---------------|-----------|-----------|
| <b>Arterial Stiffness Index (m/s)</b> | 9             | 7         | 11        |
| <b>Reflection Index (unitless)</b>    | 70            | 59        | 78        |
| <b>Shoulder Position (ms)</b>         | 23            | 17        | 26        |
| <b>Notch Position (ms)</b>            | 43            | 39        | 47        |
| <b>Peak Position (ms)</b>             | 24            | 19        | 26        |
| <b>Pulse Rate (beats/min)</b>         | 68            | 61        | 75        |

Supplementary Table IV: Univariate association of inverse-rank normalized stiffness index with clinical cardiovascular risk factors.

| <b>Covariate</b>                      | <b>Beta*</b> | <b>SE</b>               | <b>P</b>                |
|---------------------------------------|--------------|-------------------------|-------------------------|
| <b>Age</b>                            | 0.0243       | 3.34x10 <sup>-04</sup>  | <1x10 <sup>-300</sup>   |
| <b>Sex [Male]</b>                     | 0.399        | 5.38x10 <sup>-03</sup>  | <1x10 <sup>-300</sup>   |
| <b>BP Meds</b>                        | 0.340        | 8.91x10 <sup>-03</sup>  | <1x10 <sup>-300</sup>   |
| <b>Prevalent Hypertension</b>         | 0.211        | 6.01x10 <sup>-03</sup>  | 1.38x10 <sup>-269</sup> |
| <b>Ever smoked</b>                    | 0.183        | 5.41x10 <sup>-03</sup>  | 3.02x10 <sup>-250</sup> |
| <b>Prevalent Hypercholesterolemia</b> | 0.199        | 7.96 x10 <sup>-03</sup> | 4.07x10 <sup>-137</sup> |
| <b>Exercise ≥ 3x/wk</b>               | -0.160       | 9.29x10 <sup>-03</sup>  | 2.91x10 <sup>-66</sup>  |
| <b>Prevalent Diabetes</b>             | 0.196        | 0.0127                  | 9.12x10 <sup>-54</sup>  |
| <b>Alcohol ≥ 1x/mo</b>                | 0.0550       | 5.98x10 <sup>-03</sup>  | 3.29x10 <sup>-20</sup>  |
| <b>&gt;6 Tablespoons Veggies/day</b>  | -0.0635      | 0.0176                  | 3.14x10 <sup>-04</sup>  |

\*All continuous variables (except for Age) are in SD units



Supplementary Table V: Missense variants with moderate association with arterial stiffness ( $P < 1 \times 10^{-4}$ ). The MetaSVM in-silico prediction from dbNSFP is denoted as T for “tolerated” versus “D” for “deleterious.” Here, two deleterious missense variants are present. There were no variants with loss-of-function consequences and arterial stiffness  $P < 1 \times 10^{-4}$ .

| v                | rsID            | Gene             | MAF                    | P                      | Beta   | SE     | MetaSVM | hgvsnp      |
|------------------|-----------------|------------------|------------------------|------------------------|--------|--------|---------|-------------|
| 08:23001988:A:G  | ["rs1133782"]   | <i>TNFRSF10D</i> | 0.40                   | $1.36 \times 10^{-06}$ | 0.018  | 0.0038 | T       | p.Leu310Ser |
| 22:42609148:T:C  | ["rs5758651"]   | <i>TCF20</i>     | 0.21                   | $1.58 \times 10^{-06}$ | -0.022 | 0.0045 | T       | p.Ser722Gly |
| 19:56719545:A:G  | ["rs117883767"] | <i>ZSCAN5C</i>   | $8.54 \times 10^{-04}$ | $2.38 \times 10^{-05}$ | -0.287 | 0.0678 | T       | p.Asn244Ser |
| 04:146063471:C:T | ["rs151020153"] | <i>OTUD4</i>     | $4.60 \times 10^{-03}$ | $2.66 \times 10^{-05}$ | 0.121  | 0.0289 | T       | p.Val502Met |
| 10:14974905:T:C  | ["rs12768894"]  | <i>DCLRE1C</i>   | 0.18                   | $2.75 \times 10^{-05}$ | -0.020 | 0.0048 | T       | p.His243Arg |
| 12:53442956:G:C  | ["rs12369033"]  | <i>TENC1</i>     | 0.29                   | $3.54 \times 10^{-05}$ | -0.017 | 0.0041 | T       | p.Arg10Thr  |
| 06:26093141:G:A  | ["rs1800562"]   | <i>HFE</i>       | 0.08                   | $5.29 \times 10^{-05}$ | 0.028  | 0.0069 | D       | p.Cys282Tyr |
| 22:29879534:C:A  | ["rs149955255"] | <i>NEFH</i>      | $3.40 \times 10^{-03}$ | $5.98 \times 10^{-05}$ | 0.135  | 0.0337 | D       | p.Arg352Ser |
| 03:97311483:C:T  | ["rs4857276"]   | <i>EPHA6</i>     | $5.15 \times 10^{-03}$ | $5.99 \times 10^{-05}$ | 0.109  | 0.0271 | T       | p.Ala805Val |
| 19:49337577:C:T  | ["rs116979565"] | <i>HSD17B14</i>  | $9.94 \times 10^{-03}$ | $7.89 \times 10^{-05}$ | 0.073  | 0.0186 | T       | p.Ala56Thr  |
| 17:73487830:A:G  | ["rs35709918"]  | <i>KIAA0195</i>  | $5.51 \times 10^{-04}$ | $8.20 \times 10^{-05}$ | 0.309  | 0.0785 | T       | p.Asn482Ser |
| 08:39468128:A:T  | ["rs73605945"]  | <i>ADAM18</i>    | $5.24 \times 10^{-03}$ | $8.39 \times 10^{-05}$ | 0.100  | 0.0255 | T       | p.Gln142Leu |
| 19:5714234:C:T   | ["rs148374055"] | <i>LONP1</i>     | $8.85 \times 10^{-04}$ | $8.42 \times 10^{-05}$ | 0.244  | 0.0620 | T       | p.Ala160Thr |
| 11:55563362:G:A  | ["rs145501127"] | <i>OR5D14</i>    | $3.06 \times 10^{-03}$ | $8.52 \times 10^{-05}$ | -0.131 | 0.0333 | T       | p.Val111Met |
| 03:12393125:C:G  | ["rs1801282"]   | <i>PPARG</i>     | 0.12                   | $8.95 \times 10^{-05}$ | -0.022 | 0.0057 | T       | p.Pro12Ala  |
| 15:77471361:G:A  | ["rs117879553"] | <i>PEAK1</i>     | $2.00 \times 10^{-03}$ | $9.75 \times 10^{-05}$ | -0.161 | 0.0412 | T       | p.Arg970Cys |

Supplementary Table VI: Genome-wide association results from the UK Biobank (N= 131,686) for the six independent instrumental variants with  $P < 5 \times 10^{-7}$  used for arterial stiffness index Mendelian randomization. Betas refer to the alternate allele and are in units of SD ASI per alternate allele.

| Variant<br>(chr:pos:ref:alt,<br>hg19) | rsID           | Gene          | Consq          | Known MI<br>Locus Nearby  | MAF  | P                      | Beta   | SE     |
|---------------------------------------|----------------|---------------|----------------|---------------------------|------|------------------------|--------|--------|
| 02:145775399:T:C                      | ["rs1006923"]  | <i>TEX41</i>  | intron_variant | <i>ZEB2</i>               | 0.32 | $3.72 \times 10^{-10}$ | -0.025 | 0.0040 |
| 13:41185309:G:A                       | ["rs7331212"]  | <i>FOXO1</i>  | intron_variant | NA                        | 0.26 | $9.26 \times 10^{-9}$  | -0.024 | 0.0042 |
| 19:658013:A:G                         | ["rs1009628"]  | <i>RNF126</i> | intron_variant | NA                        | 0.15 | $1.21 \times 10^{-7}$  | -0.027 | 0.0051 |
| 22:42654327:C:G                       | ["rs17478227"] | <i>TCF20</i>  | intron_variant | NA                        | 0.20 | $1.95 \times 10^{-7}$  | -0.024 | 0.0046 |
| 13:111015877:C:T                      | ["rs872588"]   | <i>COL4A2</i> | intron_variant | <i>COL4A1-<br/>COL4A2</i> | 0.42 | $2.34 \times 10^{-7}$  | -0.020 | 0.0038 |
| 02:145701992:C:T                      | ["rs786250"]   | <i>TEX41</i>  | intron_variant | <i>ZEB2</i>               | 0.35 | $4.78 \times 10^{-7}$  | 0.019  | 0.0039 |

Supplementary Table VII: Sensitivity analysis of the ASI GRS to evaluate associations with potential environmental confounders using univariate logistic regression. Analyses were performed among individuals not in the ASI genome-wide association analyses using logistic regression. Odds ratio represents risk conferred by 1-SD increase in genetically-elevated ASI.

|                                     | <b>OR</b> | <b>SE</b> | <b>P</b> |
|-------------------------------------|-----------|-----------|----------|
| <b>SEX (MALE)</b>                   | 1.16      | 0.13      | 0.25     |
| <b>EVER SMOKING STATUS (0/1)</b>    | 1.07      | 0.132     | 0.617    |
| <b>VEGETABLE INTAKE (&gt;6TB)</b>   | 1.09      | 0.239     | 0.73     |
| <b>ALCOHOL INTAKE (&gt;1-3X/MO)</b> | 0.95      | 0.147     | 0.747    |
| <b>EXERCISE (&gt;3X/WK)</b>         | 1.21      | 0.45      | 0.68     |

Supplementary Table VIII: Results from association of phenotypic and genotypic ASI in the UKBB with A) blood pressure adjusted for medications, and B) raw blood pressure. A) Outcome refers to SBP+15 mmHg and DBP+10mmHg if on BP Meds. Estimate is provided in mmHg/SD of ASI mediated by exposure. B) Outcome is raw SBP and DBP, BP Meds are included as covariates in the adjusted models. In both A&B, HR is provided per SD of ASI mediated by the instrument. ASI=arterial stiffness index, GRS = genetic risk score

A)

| Outcome    | Instrument (SD) | Covariates*      | Estimate | SE   | P         | N      |
|------------|-----------------|------------------|----------|------|-----------|--------|
| SBP (mmHg) | ASI GRS         | Unadjusted       | 6.37     | 1.43 | 8.13E-06  | 208897 |
|            |                 | Adjusted Model 1 | 5.10     | 1.31 | 9.52E-05  |        |
|            |                 | Adjusted Model 2 | 4.63     | 1.29 | 3.37E-04  |        |
|            | ASI phenotype   | Unadjusted       | 2.96     | 0.06 | <1e-300   | 137858 |
|            |                 | Adjusted Model 1 | 0.83     | 0.05 | 6.44E-53  |        |
|            |                 | Adjusted Model 2 | 0.55     | 0.05 | 5.77E-24  |        |
| DBP (mmHg) | ASI GRS         | Unadjusted       | 3.48     | 0.78 | 8.72E-06  | 208894 |
|            |                 | Adjusted Model 1 | 3.13     | 0.75 | 3.26E-05  |        |
|            |                 | Adjusted Model 2 | 2.61     | 0.72 | 2.85E-04  |        |
|            | ASI phenotype   | Unadjusted       | 2.07     | 0.03 | <1e-300   | 137862 |
|            |                 | Adjusted Model 1 | 1.41     | 0.03 | <1e-300   |        |
|            |                 | Adjusted Model 2 | 1.05     | 0.03 | 7.27E-272 |        |

\*Unadjusted model refers to a univariate model with no covariates.

Adjusted Model 1 uses age, sex, and smoking status as covariates.

Adjusted Model 2 uses age, sex, smoking status, heart rate, vegetable intake, alcohol intake, and exercise frequency, prevalent hypercholesterolemia, and prevalent diabetes as covariates.

B)

| Outcome    | Instrument [SD] | Covariates*      | Estimate | SE   | P        | N      |
|------------|-----------------|------------------|----------|------|----------|--------|
| SBP (mmHg) | ASI GRS         | Unadjusted       | 5.65     | 1.35 | 2.81E-05 | 208897 |
|            |                 | Adjusted Model 1 | 4.48     | 1.26 | 3.78E-04 |        |
|            |                 | Adjusted Model 2 | 4.12     | 1.25 | 9.79E-04 |        |
|            | ASI Phenotype   | Unadjusted       | 2.50     | 0.05 | <1e-300  | 137858 |
|            |                 | Adjusted Model 1 | 0.85     | 0.05 | 3.08E-59 |        |
|            |                 | Adjusted Model 2 | 0.62     | 0.05 | 3.62E-32 |        |
| DBP (mmHg) | ASI GRS         | Unadjusted       | 3.01     | 0.73 | 4.08E-05 | 208897 |
|            |                 | Adjusted Model 1 | 2.73     | 0.72 | 1.45E-04 |        |
|            |                 | Adjusted Model 2 | 2.28     | 0.69 | 9.11E-04 |        |
|            | ASI Phenotype   | Unadjusted       | 1.77     | 0.03 | <1e-300  | 137858 |
|            |                 | Adjusted Model 1 | 1.42     | 0.03 | <1e-300  |        |
|            |                 | Adjusted Model 2 | 1.10     | 0.03 | <1e-300  |        |

\*Unadjusted model refers to a univariate model with no covariates.

Adjusted Model 1 uses BP Meds, age, sex, and smoking status as covariates.

Adjusted Model 2 uses BP Meds, age, sex, smoking status, heart rate, vegetable intake, alcohol intake, and exercise frequency, prevalent hypercholesterolemia, and prevalent diabetes as covariates.

Supplementary Table IX: Results from association of phenotypic and genotypic ASI in the UKBB with incident CAD using A) a more liberal phenotypic definition of CAD, and B) a more stringent phenotypic definition of CAD. A) liberal definition of CAD includes billing codes for heart attack, angina pectoris, unstable angina, myocardial infarction, coronary atherosclerosis, coronary artery revascularization, and other acute, subacute, and chronic forms of ischemic heart disease, or with self-reported angina, heart attack/myocardial infarction, coronary angioplasty +/- stent, or coronary artery bypass graft (CABG) surgery. B) stringent definition of CAD is the same as (A) but excludes billing codes for angina pectoris and unstable angina, and self-reported angina. HR is provided per SD of ASI mediated by the instrument. ASI=arterial stiffness index, GRS = genetic risk score

A)

| Outcome                                 | Exposure      | Covariates*      | HR   | SE    | P        | Cases (N) | Controls (N) |
|-----------------------------------------|---------------|------------------|------|-------|----------|-----------|--------------|
| <b>CAD<br/>(Liberal<br/>definition)</b> | ASI GRS       | Unadjusted       | 1.30 | 0.36  | 0.47     |           |              |
|                                         |               | Adjusted Model 1 | 1.20 | 0.36  | 0.62     | 7534      | 215527       |
|                                         |               | Adjusted Model 2 | 1.12 | 0.36  | 0.75     |           |              |
|                                         | ASI Phenotype | Unadjusted       | 1.30 | 0.016 | 2.15E-58 |           |              |
|                                         |               | Adjusted Model 1 | 1.10 | 0.017 | 2.01E-08 | 3692      | 126615       |
|                                         |               | Adjusted Model 2 | 1.08 | 0.019 | 7.24E-06 |           |              |

B)

| Outcome                                   | Instrument (SD) | Covariates*      | HR   | SE    | P        | Cases (N) | Controls (N) |
|-------------------------------------------|-----------------|------------------|------|-------|----------|-----------|--------------|
| <b>CAD<br/>(Stringent<br/>definition)</b> | ASI GRS         | Unadjusted       | 0.95 | 0.47  | 0.91     |           |              |
|                                           |                 | Adjusted Model 1 | 0.87 | 0.47  | 0.76     | 4404      | 223402       |
|                                           |                 | Adjusted Model 2 | 0.81 | 0.47  | 0.66     |           |              |
|                                           | ASI Phenotype   | Unadjusted       | 1.34 | 0.022 | 2.08E-41 |           |              |
|                                           |                 | Adjusted Model 1 | 1.10 | 0.024 | 3.45E-05 | 2027      | 131115       |
|                                           |                 | Adjusted Model 2 | 1.09 | 0.024 | 4.25E-04 |           |              |

\*Unadjusted model refers to a univariate model with no covariates.

Adjusted Model 1 uses age, sex, and smoking status as covariates.

Adjusted Model 2 uses age, sex, smoking status, heart rate, vegetable intake, alcohol intake, and exercise frequency, prevalent hypercholesterolemia, prevalent diabetes, and prevalent hypertension as covariates.

Supplementary Table X: Association of each of the 6 ASI genetic risk score variants with incident CAD in the UKBB. Reported hazard ratios refer to the ASI-raising allele. (Note: the liberal CAD definition is used here)

| Variant    | Nearest Gene | HR*  | SE   | P    | Cases (N) | Controls (N) |
|------------|--------------|------|------|------|-----------|--------------|
| rs7331212  | FOXO1        | 0.99 | 0.02 | 0.69 | 7534      | 215527       |
| rs872588   | COL4A2       | 1.02 | 0.02 | 0.15 |           |              |
| rs1009628  | RNF126       | 1.05 | 0.02 | 0.04 |           |              |
| rs17478227 | TCF20        | 1.04 | 0.02 | 0.05 |           |              |
| rs786250   | TEX41        | 0.97 | 0.02 | 0.12 |           |              |
| rs1006923  | TEX41        | 0.97 | 0.02 | 0.08 |           |              |

\* Direction corresponds to increasing ASI effect allele

Supplementary Table XI: 2-Sample Mendelian randomization with coronary artery disease. 2-Sample MR analysis between stiffness index and coronary artery disease using arterial stiffness index genetic associations from 131,686 in the UK Biobank and coronary artery disease associations from 184,305 individuals in the Coronary Artery Disease Genetics Consortium (CARDIOGRAMplusC4D). Results from several different 2-sample MR methods are shown, the highlighted results from the penalized robust IVW method were reported in main text. MR=Mendelian randomization, IVW=inverse-variance weighted

| <i>Method</i>                      | <i>Beta</i>   | <i>SE</i>    | <i>95% CI<br/>Lower</i> | <i>95% CI<br/>Upper</i> | <i>P-value</i> |
|------------------------------------|---------------|--------------|-------------------------|-------------------------|----------------|
| <i>Simple median</i>               | -0.679        | 0.338        | -1.342                  | -0.017                  | 0.045          |
| <i>Weighted median</i>             | -0.857        | 0.352        | -1.547                  | -0.166                  | 0.015          |
| <i>Penalized weighted median</i>   | -0.994        | 0.409        | -1.796                  | -0.192                  | 0.015          |
| <i>IVW</i>                         | -0.757        | 0.434        | -1.607                  | 0.094                   | 0.081          |
| <i>Penalized IVW</i>               | -0.571        | 0.408        | -1.371                  | 0.228                   | 0.161          |
| <i>Robust IVW</i>                  | -0.757        | 0.448        | -1.635                  | 0.122                   | 0.091          |
| <b><i>Penalized robust IVW</i></b> | <b>-0.576</b> | <b>0.403</b> | <b>-1.366</b>           | <b>0.214</b>            | <b>0.153</b>   |
| <i>MR-Egger</i>                    | 1.579         | 3.794        | -5.857                  | 9.015                   | 0.677          |
| <i>(intercept)</i>                 | -0.053        | 0.086        | -0.221                  | 0.115                   | 0.535          |
| <i>Penalized MR-Egger</i>          | 4.159         | 2.571        | -0.879                  | 9.197                   | 0.106          |
| <i>(intercept)</i>                 | -0.103        | 0.057        | -0.215                  | 0.008                   | 0.069          |
| <i>Robust MR-Egger</i>             | 1.969         | 4.659        | -7.164                  | 11.101                  | 0.673          |
| <i>(intercept)</i>                 | -0.061        | 0.091        | -0.239                  | 0.117                   | 0.502          |

Supplementary Table XII: A list of known independent CAD loci and their discovery sources.

| Chr | SNP         | Reported Gene              | Study Source                     | Paper                                                                                                                                                 |
|-----|-------------|----------------------------|----------------------------------|-------------------------------------------------------------------------------------------------------------------------------------------------------|
| 1   | rs17114036  | <i>PPAP2B</i>              | CAD_CARDIOgRAMplusC4D_fisher_ALL | <a href="http://www.nature.com/ng/journal/v45/n1/full/ng.2480.html">http://www.nature.com/ng/journal/v45/n1/full/ng.2480.html</a>                     |
| 1   | rs4845625   | <i>IL6R</i>                | CAD_CARDIOgRAMplusC4D_fisher_ALL | <a href="http://www.nature.com/ng/journal/v45/n1/full/ng.2480.html">http://www.nature.com/ng/journal/v45/n1/full/ng.2480.html</a>                     |
| 1   | rs17464857  | <i>MIA3</i>                | CAD_CARDIOgRAMplusC4D_fisher_ALL | <a href="http://www.nature.com/ng/journal/v45/n1/full/ng.2480.html">http://www.nature.com/ng/journal/v45/n1/full/ng.2480.html</a>                     |
| 1   | rs11206510  | <i>PCSK9</i>               | CAD_CARDIOgRAMplusC4D_fisher_ALL | <a href="http://www.nature.com/ng/journal/v45/n1/full/ng.2480.html">http://www.nature.com/ng/journal/v45/n1/full/ng.2480.html</a>                     |
| 1   | rs602633    | <i>SORT1</i>               | CAD_CARDIOgRAMplusC4D_fisher_ALL | <a href="http://www.nature.com/ng/journal/v45/n1/full/ng.2480.html">http://www.nature.com/ng/journal/v45/n1/full/ng.2480.html</a>                     |
| 2   | rs1561198   | <i>VAMP5-VAMP8-GGCX</i>    | CAD_CARDIOgRAMplusC4D_fisher_ALL | <a href="http://www.nature.com/ng/journal/v45/n1/full/ng.2480.html">http://www.nature.com/ng/journal/v45/n1/full/ng.2480.html</a>                     |
| 2   | rs2252641   | <i>ZEB2-TEX41</i>          | CAD_CARDIOgRAMplusC4D_fisher_ALL | <a href="http://www.nature.com/ng/journal/v45/n1/full/ng.2480.html">http://www.nature.com/ng/journal/v45/n1/full/ng.2480.html</a>                     |
| 2   | rs6725887   | <i>WDR12</i>               | CAD_CARDIOgRAMplusC4D_fisher_ALL | <a href="http://www.nature.com/ng/journal/v45/n1/full/ng.2480.html">http://www.nature.com/ng/journal/v45/n1/full/ng.2480.html</a>                     |
| 2   | rs1250229   | <i>FN1</i>                 | CAD_ExmChip_Replication_EA       | <a href="http://www.nature.com/ng/journal/vaop/ncurrent/full/ng.3914.html">http://www.nature.com/ng/journal/vaop/ncurrent/full/ng.3914.html</a><br>#2 |
| 2   | rs1801251   | <i>KCNJ13-GIGYF2</i>       | CAD_ExmChip_Replication_EA       | <a href="https://www.ncbi.nlm.nih.gov/pubmed/28209224">https://www.ncbi.nlm.nih.gov/pubmed/28209224</a>                                               |
| 2   | rs515135    | <i>APOB</i>                | CAD_CARDIOgRAMplusC4D_fisher_ALL | <a href="http://www.nature.com/ng/journal/v45/n1/full/ng.2480.html">http://www.nature.com/ng/journal/v45/n1/full/ng.2480.html</a>                     |
| 2   | rs6544713   | <i>ABCG5-ABCG8</i>         | CAD_CARDIOgRAMplusC4D_fisher_ALL | <a href="http://www.nature.com/ng/journal/v45/n1/full/ng.2480.html">http://www.nature.com/ng/journal/v45/n1/full/ng.2480.html</a>                     |
| 2   | rs2972146   | <i>LOC646736</i>           | CAD_UKB_ExmChip_ALL              | <a href="http://www.nature.com/ng/journal/vaop/ncurrent/full/ng.3914.html">http://www.nature.com/ng/journal/vaop/ncurrent/full/ng.3914.html</a><br>#2 |
| 3   | rs9818870   | <i>MRAS</i>                | CAD_CARDIOgRAMplusC4D_fisher_ALL | <a href="http://www.nature.com/ng/journal/v45/n1/full/ng.2480.html">http://www.nature.com/ng/journal/v45/n1/full/ng.2480.html</a>                     |
| 3   | rs12493885  | <i>ARHGEF26</i>            | CAD_ExmChip_Replication_EA       | <a href="http://www.nature.com/ng/journal/vaop/ncurrent/full/ng.3914.html">http://www.nature.com/ng/journal/vaop/ncurrent/full/ng.3914.html</a><br>#2 |
| 3   | rs17843797  | <i>UMPS-ITGB5</i>          | CAD_UKB_1KG_add_ALL              | <a href="http://www.nature.com/ng/journal/vaop/ncurrent/full/ng.3914.html">http://www.nature.com/ng/journal/vaop/ncurrent/full/ng.3914.html</a><br>#3 |
| 3   | rs748431    | <i>FGD5</i>                | CAD_UKB_1KG_add_ALL              | <a href="http://www.nature.com/ng/journal/vaop/ncurrent/full/ng.3914.html">http://www.nature.com/ng/journal/vaop/ncurrent/full/ng.3914.html</a><br>#4 |
| 3   | rs7623687   | <i>RHOA</i>                | CAD_UKB_1KG_add_ALL              | <a href="http://www.nature.com/ng/journal/vaop/ncurrent/full/ng.3914.html">http://www.nature.com/ng/journal/vaop/ncurrent/full/ng.3914.html</a><br>#5 |
| 4   | rs17087335  | <i>REST-NOA1</i>           | CAD_1KG_add_ALL                  | <a href="http://www.nature.com/ng/journal/v47/n10/full/ng.3396.html">http://www.nature.com/ng/journal/v47/n10/full/ng.3396.html</a>                   |
| 4   | rs1878406   | <i>EDNRA</i>               | CAD_CARDIOgRAMplusC4D_fisher_ALL | <a href="http://www.nature.com/ng/journal/v45/n1/full/ng.2480.html">http://www.nature.com/ng/journal/v45/n1/full/ng.2480.html</a>                     |
| 4   | rs7692387   | <i>GUCY1A3</i>             | CAD_CARDIOgRAMplusC4D_fisher_ALL | <a href="http://www.nature.com/ng/journal/v45/n1/full/ng.2480.html">http://www.nature.com/ng/journal/v45/n1/full/ng.2480.html</a>                     |
| 4   | rs10857147  | <i>FGF5</i>                | CAD_UKB_1KG_add_ALL              | <a href="http://www.nature.com/ng/journal/vaop/ncurrent/full/ng.3914.html">http://www.nature.com/ng/journal/vaop/ncurrent/full/ng.3914.html</a><br>#2 |
| 4   | rs7678555   | <i>MAD2L1</i>              | CAD_UKB_1KG_add_ALL              | <a href="http://www.nature.com/ng/journal/vaop/ncurrent/full/ng.3914.html">http://www.nature.com/ng/journal/vaop/ncurrent/full/ng.3914.html</a><br>#2 |
| 5   | rs273909    | <i>SLC22A4-SLC22A5</i>     | CAD_CARDIOgRAMplusC4D_fisher_ALL | <a href="http://www.nature.com/ng/journal/v45/n1/full/ng.2480.html">http://www.nature.com/ng/journal/v45/n1/full/ng.2480.html</a>                     |
| 5   | rs1800449   | <i>LOX</i>                 | CAD_ExmChip_Replication_EA       | <a href="http://www.nature.com/ng/journal/vaop/ncurrent/full/ng.3914.html">http://www.nature.com/ng/journal/vaop/ncurrent/full/ng.3914.html</a><br>#2 |
| 6   | rs9369640   | <i>PHACTR1</i>             | CAD_CARDIOgRAMplusC4D_fisher_ALL | <a href="http://www.nature.com/ng/journal/v45/n1/full/ng.2480.html">http://www.nature.com/ng/journal/v45/n1/full/ng.2480.html</a>                     |
| 6   | rs3130683   | <i>C2</i>                  | CAD_ExmChip_Replication_EA       | <a href="https://www.ncbi.nlm.nih.gov/pubmed/28209224">https://www.ncbi.nlm.nih.gov/pubmed/28209224</a>                                               |
| 6   | rs10947789  | <i>KCNK5</i>               | CAD_CARDIOgRAMplusC4D_fisher_ALL | <a href="http://www.nature.com/ng/journal/v45/n1/full/ng.2480.html">http://www.nature.com/ng/journal/v45/n1/full/ng.2480.html</a>                     |
| 6   | rs12190287  | <i>TCF21</i>               | CAD_CARDIOgRAMplusC4D_fisher_ALL | <a href="http://www.nature.com/ng/journal/v45/n1/full/ng.2480.html">http://www.nature.com/ng/journal/v45/n1/full/ng.2480.html</a>                     |
| 6   | rs4252120   | <i>PLG</i>                 | CAD_CARDIOgRAMplusC4D_fisher_ALL | <a href="http://www.nature.com/ng/journal/v45/n1/full/ng.2480.html">http://www.nature.com/ng/journal/v45/n1/full/ng.2480.html</a>                     |
| 6   | rs12205331  | <i>ANKS1A</i>              | CAD_CARDIOgRAMplusC4D_fisher_ALL | <a href="http://www.nature.com/ng/journal/v45/n1/full/ng.2480.html">http://www.nature.com/ng/journal/v45/n1/full/ng.2480.html</a>                     |
| 6   | rs3798220   | <i>SLC22A3-LPAL2-LPA</i>   | CAD_CARDIOgRAMplusC4D_fisher_ALL | <a href="http://www.nature.com/ng/journal/v45/n1/full/ng.2480.html">http://www.nature.com/ng/journal/v45/n1/full/ng.2480.html</a>                     |
| 7   | rs2023938   | <i>HDAC9</i>               | CAD_CARDIOgRAMplusC4D_fisher_ALL | <a href="http://www.nature.com/ng/journal/v45/n1/full/ng.2480.html">http://www.nature.com/ng/journal/v45/n1/full/ng.2480.html</a>                     |
| 7   | rs11556924  | <i>ZC3HC1</i>              | CAD_CARDIOgRAMplusC4D_fisher_ALL | <a href="http://www.nature.com/ng/journal/v45/n1/full/ng.2480.html">http://www.nature.com/ng/journal/v45/n1/full/ng.2480.html</a>                     |
| 7   | rs3918226   | <i>NOS3</i>                | CAD_1KG_add_ALL                  | <a href="http://www.nature.com/ng/journal/v47/n10/full/ng.3396.html">http://www.nature.com/ng/journal/v47/n10/full/ng.3396.html</a>                   |
| 8   | rs264       | <i>LPL</i>                 | CAD_CARDIOgRAMplusC4D_fisher_ALL | <a href="http://www.nature.com/ng/journal/v45/n1/full/ng.2480.html">http://www.nature.com/ng/journal/v45/n1/full/ng.2480.html</a>                     |
| 8   | rs2954029   | <i>TRIB1</i>               | CAD_CARDIOgRAMplusC4D_fisher_ALL | <a href="http://www.nature.com/ng/journal/v45/n1/full/ng.2480.html">http://www.nature.com/ng/journal/v45/n1/full/ng.2480.html</a>                     |
| 9   | rs1333049   | <i>CDKN2BAS1</i>           | CAD_CARDIOgRAMplusC4D_fisher_ALL | <a href="http://www.nature.com/ng/journal/v45/n1/full/ng.2480.html">http://www.nature.com/ng/journal/v45/n1/full/ng.2480.html</a>                     |
| 9   | rs111245230 | <i>SVEP1</i>               | CAD_ExmChip_Replication_EA       | <a href="http://www.ncbi.nlm.nih.gov/pubmed/10.1056/NEJMoa1507652">http://www.ncbi.nlm.nih.gov/pubmed/10.1056/NEJMoa1507652</a>                       |
| 9   | rs579459    | <i>ABO</i>                 | CAD_CARDIOgRAMplusC4D_fisher_ALL | <a href="http://www.nature.com/ng/journal/v45/n1/full/ng.2480.html">http://www.nature.com/ng/journal/v45/n1/full/ng.2480.html</a>                     |
| 10  | rs2505083   | <i>KIAA1462</i>            | CAD_CARDIOgRAMplusC4D_fisher_ALL | <a href="http://www.nature.com/ng/journal/v45/n1/full/ng.2480.html">http://www.nature.com/ng/journal/v45/n1/full/ng.2480.html</a>                     |
| 10  | rs501120    | <i>CXCL12</i>              | CAD_CARDIOgRAMplusC4D_fisher_ALL | <a href="http://www.nature.com/ng/journal/v45/n1/full/ng.2480.html">http://www.nature.com/ng/journal/v45/n1/full/ng.2480.html</a>                     |
| 10  | rs2246833   | <i>LIPA</i>                | CAD_CARDIOgRAMplusC4D_fisher_ALL | <a href="http://www.nature.com/ng/journal/v45/n1/full/ng.2480.html">http://www.nature.com/ng/journal/v45/n1/full/ng.2480.html</a>                     |
| 10  | rs12413409  | <i>CYP17A1-CNNM2-NT5C2</i> | CAD_CARDIOgRAMplusC4D_fisher_ALL | <a href="http://www.nature.com/ng/journal/v45/n1/full/ng.2480.html">http://www.nature.com/ng/journal/v45/n1/full/ng.2480.html</a>                     |
| 11  | rs10840293  | <i>SWAP70</i>              | CAD_1KG_add_ALL                  | <a href="http://www.nature.com/ng/journal/v47/n10/full/ng.3396.html">http://www.nature.com/ng/journal/v47/n10/full/ng.3396.html</a>                   |
| 11  | rs11042937  | <i>CTR9-MRVI1</i>          | CAD_ExmChip_Replication_EA       | <a href="https://www.ncbi.nlm.nih.gov/pubmed/28209224">https://www.ncbi.nlm.nih.gov/pubmed/28209224</a>                                               |
| 11  | rs974819    | <i>PDGFD</i>               | CAD_CARDIOgRAMplusC4D_fisher_ALL | <a href="http://www.nature.com/ng/journal/v45/n1/full/ng.2480.html">http://www.nature.com/ng/journal/v45/n1/full/ng.2480.html</a>                     |
| 11  | rs9326246   | <i>ZNF259-APOA5-APOA1</i>  | CAD_CARDIOgRAMplusC4D_fisher_ALL | <a href="http://www.nature.com/ng/journal/v45/n1/full/ng.2480.html">http://www.nature.com/ng/journal/v45/n1/full/ng.2480.html</a>                     |
| 12  | rs11172113  | <i>LRP1</i>                | CAD_ExmChip_Replication_EA       | <a href="https://www.ncbi.nlm.nih.gov/pubmed/28209224">https://www.ncbi.nlm.nih.gov/pubmed/28209224</a>                                               |
| 12  | rs11830157  | <i>KSR2</i>                | CAD_1KG_rec_ALL                  | <a href="http://www.nature.com/ng/journal/v47/n10/full/ng.3396.html">http://www.nature.com/ng/journal/v47/n10/full/ng.3396.html</a>                   |
| 12  | rs3184504   | <i>SH2B3</i>               | CAD_CARDIOgRAMplusC4D_fisher_ALL | <a href="http://www.nature.com/ng/journal/v45/n1/full/ng.2480.html">http://www.nature.com/ng/journal/v45/n1/full/ng.2480.html</a>                     |
| 12  | rs11057830  | <i>SCARB1</i>              | CAD_ExmChip_Replication_EA       | <a href="https://www.ncbi.nlm.nih.gov/pubmed/28209224">https://www.ncbi.nlm.nih.gov/pubmed/28209224</a>                                               |
| 12  | rs11057401  | <i>CCDC92</i>              | CAD_UKB_ExmChip_ALL              | <a href="http://www.nature.com/ng/journal/vaop/ncurrent/full/ng.3914.html">http://www.nature.com/ng/journal/vaop/ncurrent/full/ng.3914.html</a><br>#2 |



|    |             |                             |                                  |                                                                                                                                                       |
|----|-------------|-----------------------------|----------------------------------|-------------------------------------------------------------------------------------------------------------------------------------------------------|
| 12 | rs10841443  | <i>RP11-664H17.1</i>        | CAD_UKB_1KG_add_ALL              | <a href="http://www.nature.com/ng/journal/vaop/ncurrent/full/ng.3914.html#f2">http://www.nature.com/ng/journal/vaop/ncurrent/full/ng.3914.html#f2</a> |
| 12 | rs1169288   | <i>HNF1A</i>                | CAD_UKB_1KG_add_ALL              | <a href="http://www.nature.com/ng/journal/vaop/ncurrent/full/ng.3914.html#f2">http://www.nature.com/ng/journal/vaop/ncurrent/full/ng.3914.html#f2</a> |
| 13 | rs9319428   | <i>FLT1</i>                 | CAD_CARDIOgRAMplusC4D_fisher_ALL | <a href="http://www.nature.com/ng/journal/v45/n1/full/ng.2480.html">http://www.nature.com/ng/journal/v45/n1/full/ng.2480.html</a>                     |
| 13 | rs4773144   | <i>COL4A1-COL4A2</i>        | CAD_CARDIOgRAMplusC4D_fisher_ALL | <a href="http://www.nature.com/ng/journal/v45/n1/full/ng.2480.html">http://www.nature.com/ng/journal/v45/n1/full/ng.2480.html</a>                     |
| 14 | rs2895811   | <i>HHIPL1</i>               | CAD_CARDIOgRAMplusC4D_fisher_ALL | <a href="http://www.nature.com/ng/journal/v45/n1/full/ng.2480.html">http://www.nature.com/ng/journal/v45/n1/full/ng.2480.html</a>                     |
| 15 | rs17293632  | <i>SMAD3</i>                | CAD_ExmChip_Replication_EA       | <a href="https://www.ncbi.nlm.nih.gov/pmc/articles/PMC4589895/">https://www.ncbi.nlm.nih.gov/pmc/articles/PMC4589895/</a>                             |
| 15 | rs7173743   | <i>ADAMTS7</i>              | CAD_CARDIOgRAMplusC4D_fisher_ALL | <a href="http://www.nature.com/ng/journal/v45/n1/full/ng.2480.html">http://www.nature.com/ng/journal/v45/n1/full/ng.2480.html</a>                     |
| 15 | rs8042271   | <i>MFGE8-ABHD2</i>          | CAD_1KG_add_ALL                  | <a href="http://www.nature.com/ng/journal/v47/n10/full/ng.3396.html">http://www.nature.com/ng/journal/v47/n10/full/ng.3396.html</a>                   |
| 15 | rs17514846  | <i>FURIN-FES</i>            | CAD_CARDIOgRAMplusC4D_fisher_ALL | <a href="http://www.nature.com/ng/journal/v45/n1/full/ng.2480.html">http://www.nature.com/ng/journal/v45/n1/full/ng.2480.html</a>                     |
| 16 | rs247616    | <i>CETP-HERPUD1</i>         | CAD_ExmChip_Replication_EA       | <a href="https://www.ncbi.nlm.nih.gov/pubmed/28209224">https://www.ncbi.nlm.nih.gov/pubmed/28209224</a>                                               |
| 16 | rs3851738   | <i>BCAR1-CFDP1-TMEM170A</i> | CAD_UKB_1KG_add_ALL              | <a href="http://www.nature.com/ng/journal/vaop/ncurrent/full/ng.3914.html#f2">http://www.nature.com/ng/journal/vaop/ncurrent/full/ng.3914.html#f2</a> |
| 16 | rs7500448   | <i>CDH13</i>                | CAD_UKB_1KG_add_ALL              | <a href="http://www.nature.com/ng/journal/vaop/ncurrent/full/ng.3914.html#f2">http://www.nature.com/ng/journal/vaop/ncurrent/full/ng.3914.html#f2</a> |
| 17 | rs2281727   | <i>SMG6</i>                 | CAD_CARDIOgRAMplusC4D_fisher_ALL | <a href="http://www.nature.com/ng/journal/v45/n1/full/ng.2480.html">http://www.nature.com/ng/journal/v45/n1/full/ng.2480.html</a>                     |
| 17 | rs12936587  | <i>RAI1-PEMT-RASD1</i>      | CAD_CARDIOgRAMplusC4D_fisher_ALL | <a href="http://www.nature.com/ng/journal/v45/n1/full/ng.2480.html">http://www.nature.com/ng/journal/v45/n1/full/ng.2480.html</a>                     |
| 17 | rs15563     | <i>UBE2Z</i>                | CAD_CARDIOgRAMplusC4D_fisher_ALL | <a href="http://www.nature.com/ng/journal/v45/n1/full/ng.2480.html">http://www.nature.com/ng/journal/v45/n1/full/ng.2480.html</a>                     |
| 17 | rs7212798   | <i>BCAS3</i>                | CAD_1KG_add_ALL                  | <a href="http://www.nature.com/ng/journal/v47/n10/full/ng.3396.html">http://www.nature.com/ng/journal/v47/n10/full/ng.3396.html</a>                   |
| 18 | rs663129    | <i>PMAIP1-MC4R</i>          | CAD_1KG_add_ALL                  | <a href="http://www.nature.com/ng/journal/v47/n10/full/ng.3396.html">http://www.nature.com/ng/journal/v47/n10/full/ng.3396.html</a>                   |
| 19 | rs12976411  | <i>ZNF507-LOC400684</i>     | CAD_1KG_rec_ALL                  | <a href="http://www.nature.com/ng/journal/v47/n10/full/ng.3396.html">http://www.nature.com/ng/journal/v47/n10/full/ng.3396.html</a>                   |
| 19 | rs116843064 | <i>ANGPTL4</i>              | CAD_ExmChip_Replication_EA       | <a href="http://www.nejm.org/doi/full/10.1056/NEJMoa1507652">http://www.nejm.org/doi/full/10.1056/NEJMoa1507652</a>                                   |
| 19 | rs1122608   | <i>LDLR</i>                 | CAD_CARDIOgRAMplusC4D_fisher_ALL | <a href="http://www.nature.com/ng/journal/v45/n1/full/ng.2480.html">http://www.nature.com/ng/journal/v45/n1/full/ng.2480.html</a>                     |
| 19 | rs2075650   | <i>ApoE-ApoC1</i>           | CAD_CARDIOgRAMplusC4D_fisher_ALL | <a href="http://www.nature.com/ng/journal/v45/n1/full/ng.2480.html">http://www.nature.com/ng/journal/v45/n1/full/ng.2480.html</a>                     |
| 19 | rs8108632   | <i>TGFB1</i>                | CAD_UKB_1KG_add_ALL              | <a href="http://www.nature.com/ng/journal/vaop/ncurrent/full/ng.3914.html#f2">http://www.nature.com/ng/journal/vaop/ncurrent/full/ng.3914.html#f2</a> |
| 21 | rs9982601   | <i>KCNE2</i>                | CAD_CARDIOgRAMplusC4D_fisher_ALL | <a href="http://www.nature.com/ng/journal/v45/n1/full/ng.2480.html">http://www.nature.com/ng/journal/v45/n1/full/ng.2480.html</a>                     |
| 22 | rs180803    | <i>POM121L9P-ADORA2A</i>    | CAD_1KG_add_ALL                  | <a href="http://www.nature.com/ng/journal/v47/n10/full/ng.3396.html">http://www.nature.com/ng/journal/v47/n10/full/ng.3396.html</a>                   |

Supplementary Table XIII: Comparing variant-level effects between ASI and CAD. ASI variant-level summary statistics are from the UK Biobank association, CAD summary statistics refer to the CARDIOGRAMplusC4D consortium results with 1000 Genomes Phase 1(5) imputation provided in the “cad.add.160614.website.txt.gz” file downloaded from <http://www.cardiogramplusc4d.org/data-downloads/>. The 77 variants listed here are the ones identified from **Supplementary Table 9** above. ASI = arterial stiffness index, CAD = coronary artery disease

| CAD Locus            | rsID              | ASI-raising allele | ASI Beta | ASI SE | ASI P    | CAD Beta | CAD SE | CAD P    |
|----------------------|-------------------|--------------------|----------|--------|----------|----------|--------|----------|
| ZEB2-TEX41           | rs2252641         | T                  | 0.0167   | 0.0037 | 6.68E-06 | -0.033   | 0.010  | 5.16E-04 |
| PHACTR1              | rs9349379         | A                  | 0.0153   | 0.0038 | 4.49E-05 | -0.132   | 0.010  | 1.81E-42 |
| ABO                  | rs600038*         | T                  | 0.0177   | 0.0045 | 8.82E-05 | -0.074   | 0.011  | 7.15E-11 |
|                      | (rs579459 proxy)  |                    |          |        |          |          |        |          |
| CYP17A1-CNNM2-NT5C2  | rs12413409        | G                  | 0.0231   | 0.0069 | 0.000794 | 0.075    | 0.014  | 1.07E-07 |
| SH2B3                | rs3184504         | T                  | 0.0116   | 0.0037 | 0.00163  | 0.064    | 0.011  | 1.03E-09 |
| LRP1                 | rs11172113        | T                  | 0.0103   | 0.0037 | 0.00613  | -0.041   | 0.010  | 1.71E-05 |
| FGF5                 | rs10857147        | T                  | 0.0111   | 0.0041 | 0.00626  | 0.055    | 0.011  | 5.83E-07 |
| WDR12                | rs6725887         | T                  | 0.0148   | 0.0055 | 0.00706  | -0.133   | 0.015  | 9.51E-18 |
| MRAS                 | rs9818870         | C                  | 0.0131   | 0.0051 | 0.00971  | -0.065   | 0.014  | 2.21E-06 |
| ZC3HC1               | rs11556924        | C                  | 0.0096   | 0.0038 | 0.011    | 0.073    | 0.011  | 5.34E-11 |
| PM1P1-MC4R           | rs663129          | A                  | 0.0109   | 0.0043 | 0.012    | 0.058    | 0.011  | 3.20E-08 |
| FURIN-FES            | rs17514846        | A                  | 0.0089   | 0.0037 | 0.0164   | 0.051    | 0.010  | 3.10E-07 |
| BCAR1-CFDP1-TMEM170A | rs3851738         | G                  | 0.0090   | 0.0038 | 0.0171   | -0.045   | 0.010  | 1.88E-06 |
| IL6R                 | rs4845625         | T                  | 0.0087   | 0.0037 | 0.0194   | 0.051    | 0.009  | 3.93E-08 |
| ApoE-ApoC1           | rs2075650         | A                  | 0.0120   | 0.0053 | 0.0229   | -0.071   | 0.015  | 1.61E-06 |
| SMG6                 | rs2281727         | A                  | 0.0082   | 0.0039 | 0.034    | -0.047   | 0.010  | 7.11E-07 |
| LOC646736            | rs2972146         | T                  | 0.0081   | 0.0039 | 0.0346   | 0.039    | 0.010  | 1.38E-04 |
| ARHGEF26             | rs12493885        | G                  | 0.0097   | 0.0052 | 0.0616   | -0.066   | 0.016  | 2.43E-05 |
| UMPS-ITGB5           | rs17843797        | T                  | 0.0095   | 0.0055 | 0.0829   | -0.064   | 0.014  | 2.43E-06 |
| CCDC92               | rs11057401        | T                  | 0.0067   | 0.0040 | 0.0893   | 0.027    | 0.010  | 8.31E-03 |
| EDNRA                | rs1878406         | T                  | 0.0090   | 0.0053 | 0.0907   | 0.060    | 0.012  | 1.24E-06 |
| KIAA1462             | rs2505083         | C                  | 0.0061   | 0.0037 | 0.101    | 0.061    | 0.010  | 1.57E-10 |
| TRIB1                | rs2954029         | A                  | 0.0060   | 0.0037 | 0.106    | 0.044    | 0.009  | 2.61E-06 |
| LIPA                 | rs2246833         | C                  | 0.0060   | 0.0039 | 0.12     | -0.065   | 0.010  | 1.33E-11 |
| ABCG5-ABCG8          | rs6544713         | T                  | 0.0058   | 0.0039 | 0.139    | 0.051    | 0.010  | 8.88E-07 |
| RP11-664H17.1        | rs10841443        | G                  | 0.0058   | 0.0039 | 0.142    | 0.051    | 0.010  | 5.81E-07 |
| LPL                  | rs264             | G                  | 0.0078   | 0.0053 | 0.143    | 0.058    | 0.013  | 1.06E-05 |
| CDKN2BAS1            | rs1333049         | C                  | 0.0053   | 0.0037 | 0.148    | 0.193    | 0.009  | 3.86E-93 |
| LDLR                 | rs1122608         | T                  | 0.0060   | 0.0042 | 0.155    | -0.073   | 0.011  | 2.73E-11 |
| REST-NOA1            | rs17087335        | G                  | 0.0066   | 0.0047 | 0.166    | -0.061   | 0.011  | 4.59E-08 |
| PPAP2B               | rs17114036        | G                  | 0.0088   | 0.0064 | 0.166    | -0.123   | 0.017  | 2.22E-13 |
| ANGPTL4              | rs116843064       | G                  | 0.0181   | 0.0134 | 0.175    | 0.141    | 0.043  | 1.04E-03 |
| SVEP1                | rs111245230       | C                  | 0.0126   | 0.0101 | 0.21     | 0.054    | 0.027  | 4.56E-02 |
| GUCY1A3              | rs7692387         | G                  | 0.0057   | 0.0047 | 0.233    | 0.068    | 0.012  | 7.35E-09 |
| SCARB1               | rs11057830        | A                  | 0.0060   | 0.0053 | 0.259    | 0.046    | 0.013  | 6.85E-04 |
| MAD2L1               | rs7678555         | C                  | 0.0046   | 0.0041 | 0.262    | 0.054    | 0.011  | 3.26E-07 |
| UBE2Z                | rs15563           | A                  | 0.0040   | 0.0037 | 0.284    | -0.040   | 0.009  | 1.83E-05 |
| FLT1                 | rs9319428         | G                  | 0.0043   | 0.0040 | 0.288    | -0.040   | 0.010  | 7.13E-05 |
| NOS3                 | rs3918226         | C                  | 0.0073   | 0.0069 | 0.29     | -0.133   | 0.022  | 1.69E-09 |
| VAMP5-VAMP8-GGCX     | rs1561198         | C                  | 0.0038   | 0.0037 | 0.3      | -0.058   | 0.009  | 6.37E-10 |
| PCSK9                | rs11206510        | C                  | 0.0046   | 0.0047 | 0.326    | -0.075   | 0.013  | 2.34E-08 |
| MIA3                 | rs17464857        | G                  | 0.0047   | 0.0051 | 0.358    | -0.057   | 0.014  | 4.18E-05 |
| KCNJ13-GIGYF2        | rs1801251         | G                  | 0.0035   | 0.0038 | 0.367    | -0.039   | 0.010  | 1.06E-04 |
| HNF1A                | rs1169288         | C                  | 0.0035   | 0.0040 | 0.381    | 0.047    | 0.010  | 1.98E-06 |
| C2                   | rs3130683         | T                  | 0.0045   | 0.0052 | 0.383    | 0.049    | 0.017  | 4.15E-03 |
| RHOA                 | rs7623687         | A                  | 0.0041   | 0.0053 | 0.434    | 0.070    | 0.014  | 5.22E-07 |
| LOX                  | rs1800449         | T                  | 0.0039   | 0.0049 | 0.435    | 0.045    | 0.012  | 3.06E-04 |
| SLC22A3-LPAL2-LPA    | rs3798220         | T                  | 0.0101   | 0.0137 | 0.464    | -0.350   | 0.060  | 4.66E-09 |
| SORT1                | rs602633          | G                  | 0.0032   | 0.0045 | 0.472    | 0.096    | 0.012  | 6.97E-17 |
| ANKS1A               | rs12205331        | C                  | 0.0032   | 0.0044 | 0.475    | 0.026    | 0.013  | 4.21E-02 |
| APOB                 | rs515135          | T                  | 0.0033   | 0.0048 | 0.497    | -0.067   | 0.012  | 3.09E-08 |
| SWAP70               | rs10840293        | A                  | 0.0022   | 0.0037 | 0.551    | 0.055    | 0.010  | 1.28E-08 |
| BCAS3                | rs2120222*        | C                  | 0.0028   | 0.0052 | 0.588    | 0.070    | 0.014  | 1.92E-07 |
|                      | (rs7212798 proxy) |                    |          |        |          |          |        |          |

|                           |                                  |   |        |        |       |        |       |          |
|---------------------------|----------------------------------|---|--------|--------|-------|--------|-------|----------|
| <i>HDAC9</i>              | rs2023938                        | C | 0.0030 | 0.0062 | 0.626 | 0.059  | 0.015 | 1.36E-04 |
| <i>FGD5</i>               | rs748431                         | G | 0.0017 | 0.0038 | 0.649 | 0.049  | 0.009 | 2.14E-07 |
| <i>RAI1-PEMT-RASD1</i>    | rs12936587                       | A | 0.0016 | 0.0037 | 0.67  | -0.033 | 0.010 | 8.24E-04 |
| <i>CXCL12</i>             | rs501120                         | T | 0.0023 | 0.0055 | 0.672 | 0.079  | 0.012 | 1.39E-11 |
| <i>ZNF507-LOC400684</i>   | rs12976411                       | T | 0.0040 | 0.0097 | 0.678 | -0.048 | 0.018 | 9.12E-03 |
| <i>COL4A1-COL4A2</i>      | rs4773144                        | A | 0.0015 | 0.0037 | 0.692 | -0.052 | 0.010 | 3.87E-07 |
| <i>MFGE8-ABHD2</i>        | rs8042271                        | A | 0.0039 | 0.0100 | 0.699 | -0.097 | 0.018 | 3.68E-08 |
| <i>SMAD3</i>              | rs17293632                       | T | 0.0017 | 0.0043 | 0.7   | -0.070 | 0.012 | 5.72E-09 |
| <i>CTR9-MRVI1</i>         | rs11042937                       | T | 0.0014 | 0.0037 | 0.706 | 0.012  | 0.010 | 2.19E-01 |
| <i>CDH13</i>              | rs7500448                        | G | 0.0016 | 0.0043 | 0.707 | -0.055 | 0.012 | 2.11E-06 |
| <i>MFGE8-ABHD2</i>        | rs56015348*<br>(rs8042271 proxy) | A | 0.0033 | 0.0100 | 0.742 | -0.092 | 0.018 | 4.39E-07 |
| <i>PLG</i>                | rs4252120                        | T | 0.0012 | 0.0040 | 0.777 | 0.033  | 0.011 | 3.32E-03 |
| <i>KCNE2</i>              | rs9982601                        | C | 0.0014 | 0.0055 | 0.793 | -0.110 | 0.015 | 1.33E-13 |
| <i>CETP-HERPUD1</i>       | rs247616                         | C | 0.0009 | 0.0039 | 0.816 | 0.031  | 0.010 | 2.36E-03 |
| <i>SLC22A4-SLC22A5</i>    | rs273909                         | G | 0.0013 | 0.0057 | 0.821 | 0.056  | 0.015 | 1.24E-04 |
| <i>KSR2</i>               | rs11830157                       | G | 0.0008 | 0.0038 | 0.825 | 0.035  | 0.010 | 3.88E-04 |
| <i>TGFB1</i>              | rs1989457*<br>(rs8108632 proxy)  | C | 0.0008 | 0.0038 | 0.833 | -0.045 | 0.010 | 3.15E-06 |
| <i>HHIPL1</i>             | rs2895811                        | T | 0.0007 | 0.0037 | 0.841 | -0.041 | 0.010 | 1.86E-05 |
| <i>ADAMTS7</i>            | rs7173743                        | C | 0.0007 | 0.0037 | 0.841 | -0.076 | 0.009 | 5.55E-16 |
| <i>TCF21</i>              | rs12190287                       | C | 0.0007 | 0.0038 | 0.846 | 0.058  | 0.018 | 1.07E-03 |
| <i>POM121L9P-ADORA2A</i>  | rs5760368*<br>(rs180803 proxy)   | C | 0.0022 | 0.0173 | 0.898 | -0.134 | 0.024 | 2.48E-08 |
| <i>KCNK5</i>              | rs10947789                       | C | 0.0002 | 0.0043 | 0.96  | -0.053 | 0.011 | 1.63E-06 |
| <i>ZNF259-APOA5-APOA1</i> | rs9326246                        | C | 0.0003 | 0.0074 | 0.969 | 0.046  | 0.015 | 2.46E-03 |
| <i>PDGFD</i>              | rs974819                         | T | 0.0001 | 0.0041 | 0.986 | 0.063  | 0.010 | 2.44E-10 |

Supplementary Table XIV: Evaluating the reverse association, of CAD influencing ASI, using 2-sample Mendelian randomization, using the variant-level statistics from Supplementary Table 10 across 77 CAD GWAS variants.

| <i>Method</i>                    | <i>Estimate</i> | <i>Std Error</i> | <i>Lower 95% CI</i> | <i>Upper 95% CI</i> | <i>P-value</i> |
|----------------------------------|-----------------|------------------|---------------------|---------------------|----------------|
| <i>Simple median</i>             | 0.006           | 0.015            | -0.022              | 0.035               | 0.67           |
| <i>Weighted median</i>           | -0.003          | 0.013            | -0.029              | 0.023               | 0.829          |
| <i>Penalized weighted median</i> | 0.023           | 0.014            | -0.004              | 0.051               | 0.091          |
| <i>IVW</i>                       | -0.006          | 0.012            | -0.03               | 0.018               | 0.637          |
| <i>Penalized IVW</i>             | 0.008           | 0.01             | -0.012              | 0.028               | 0.423          |
| <i>Robust IVW</i>                | 0               | 0.016            | -0.031              | 0.03                | 0.989          |
| <i>Penalized robust IVW</i>      | 0.008           | 0.011            | -0.014              | 0.03                | 0.469          |
| <i>MR-Egger</i>                  | -0.028          | 0.027            | -0.081              | 0.025               | 0.299          |
| <i>(intercept)</i>               | 0.002           | 0.002            | -0.002              | 0.005               | 0.354          |
| <i>Penalized MR-Egger</i>        | -0.02           | 0.022            | -0.064              | 0.024               | 0.376          |
| <i>(intercept)</i>               | 0.002           | 0.001            | -0.001              | 0.005               | 0.234          |
| <i>Robust MR-Egger</i>           | -0.03           | 0.045            | -0.119              | 0.059               | 0.507          |
| <i>(intercept)</i>               | 0.002           | 0.002            | -0.003              | 0.007               | 0.386          |

Supplementary Figure I: Manhattan and quantile-quantile plot of genome-wide association statistics for arterial stiffness index. A) Manhattan plot labeling loci achieving  $P < 5 \times 10^{-7}$ . B) Quantile-quantile plot shows no significant genomic inflation ( $\Lambda < 1.10$ ).

**A.**

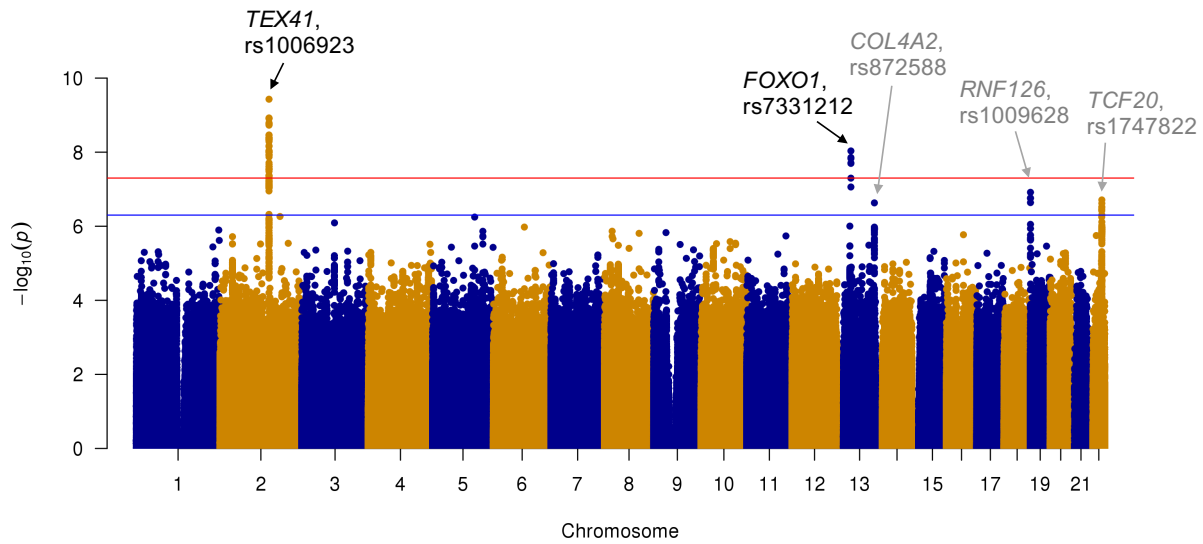

**B.**

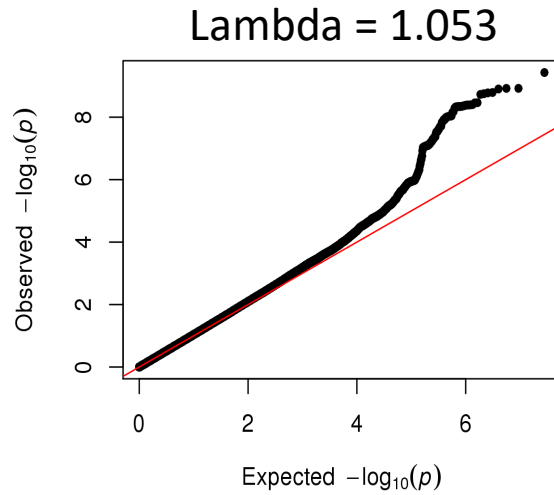

Supplementary Figure II: Chromatin contact points and aorta enhancers at top arterial stiffness index loci. The HUGIn platform (<http://yunliweb.its.unc.edu/HUGIn/#plots>) was used to visualize chromatin contact points at top arterial stiffness index loci. The panel of genes on the top indicate expression level in aorta with intensity of red color. Below this is an indication of aorta enhancer regions. The black vertical line in the center of each plot is aligned to the top variant at that locus. The probability of physical chromatin contact between each top variant and regions around it is indicated via the blue waveforms, which are estimated by taking into account the observed (black) versus expected (red) chromatin contact counts at each region around the top variant.

**A. *TEX41***

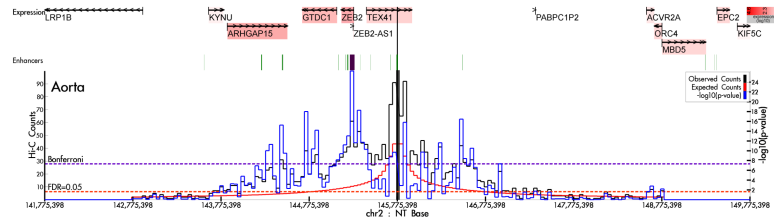

**B. *FOXO1***

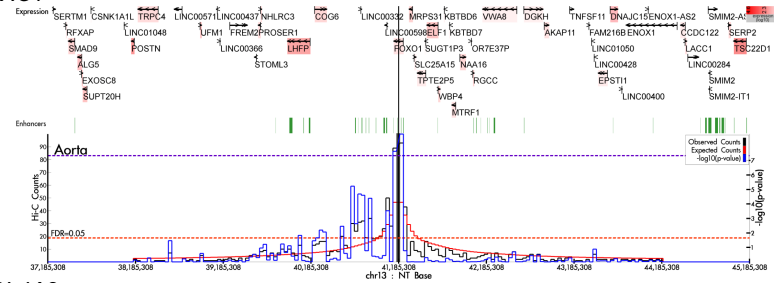

**C. *COL4A2***

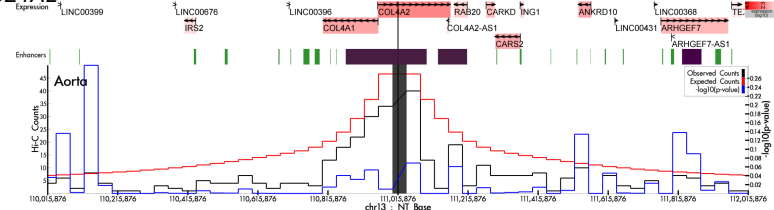

**D. *TCF20***

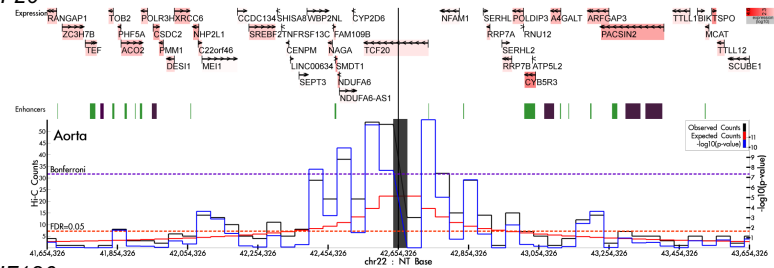

**E. *RNF126***

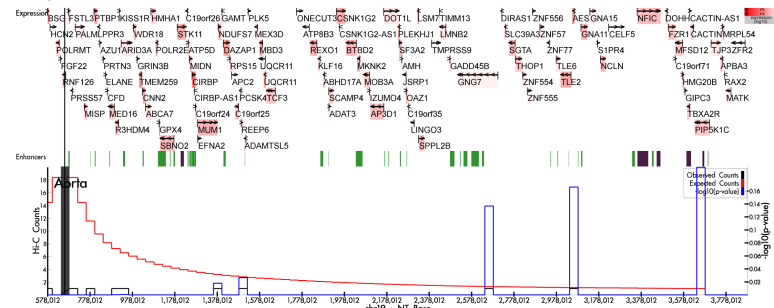

Supplementary Figure III: Arterial stiffness genetic risk score histogram and association with arterial stiffness index phenotype. A. Histogram of the arterial stiffness index raw genetic risk score (GRS) prior to inverse-rank normalization and adjustment, B. Association of quartiles of the adjusted, inverse-rank normalized arterial stiffness genetic risk score with the inverse-rank normalized arterial stiffness phenotype in SD (F-statistic: 138,  $P=8 \times 10^{-32}$ ).

A.

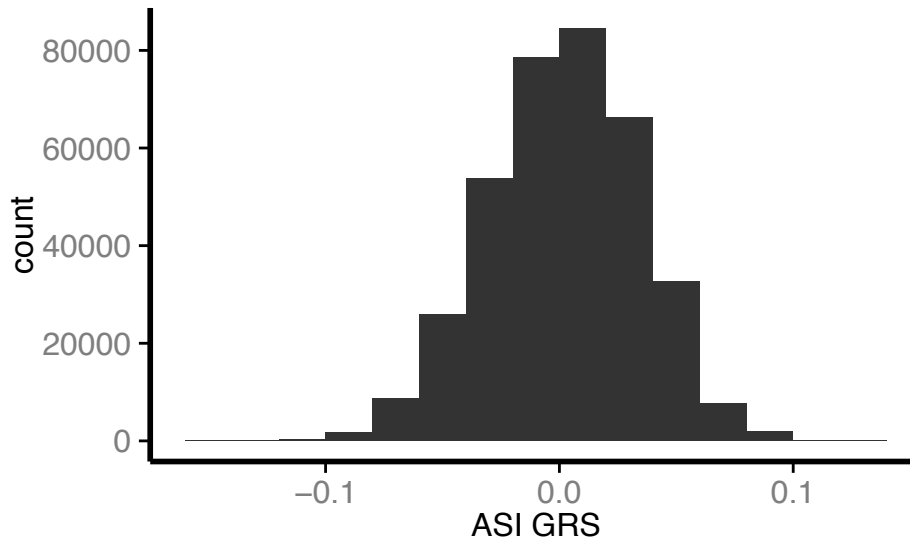

B.

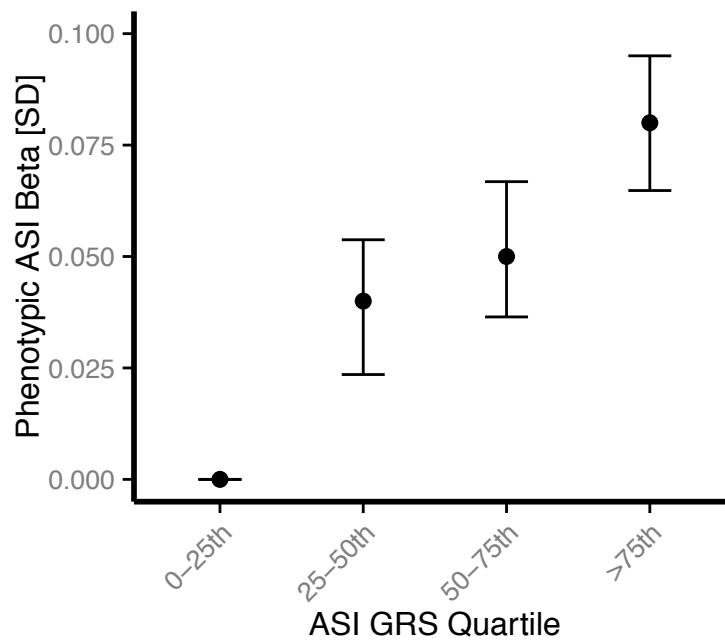

Supplementary Figure IV: Association of ASI genetic instruments, individually and combined, with prevalent CAD in 184,305 individuals (60,810 prevalent cases) from the CARDIOGRAMplusC4D cohort using 2-sample Mendelian Randomization. Variant-level odds ratios are reported as CAD effect normalized to the ASI effect. The combined ASI genetic risk score effect is provided from the robust, penalized inverse-variance weighted 2-sample MR method. ASI = Arterial stiffness index, CAD = coronary artery disease.

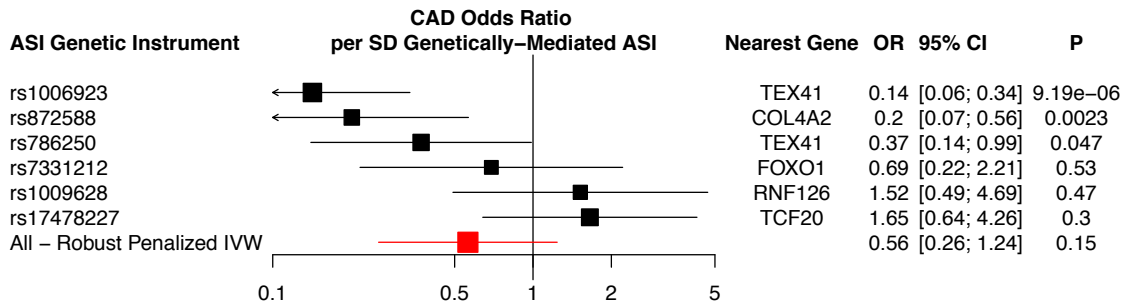



## References

1. Martin JS, Xu Z, Reiner AP et al. HUGIn: Hi-C Unifying Genomic Interrogator. *Bioinformatics* 2017;33:3793-3795.
2. Dong C, Wei P, Jian X et al. Comparison and integration of deleteriousness prediction methods for nonsynonymous SNVs in whole exome sequencing studies. *Hum Mol Genet* 2015;24:2125-37.
3. Valenti L, Maloberti A, Signorini S et al. Iron Stores, Hepcidin, and Aortic Stiffness in Individuals with Hypertension. *PLoS One* 2015;10:e0134635.
4. Gaenger H, Marschang P, Sturm W et al. Association between increased iron stores and impaired endothelial function in patients with hereditary hemochromatosis. *J Am Coll Cardiol* 2002;40:2189-94.
5. Nikpay M, Goel A, Won HH et al. A comprehensive 1,000 Genomes-based genome-wide association meta-analysis of coronary artery disease. *Nat Genet* 2015;47:1121-1130.
